# Supplementary material for: Systematic review of gender differences in the epidemiology and risk factors of exertional heat illness and heat tolerance in the armed forces
Source: PubMed Central journal article supplement — BMJ Open. 2020 Apr 6;10(4):e031825. doi: 10.1136/bmjopen-2019-031825 (PMC7245403; doi:10.1136/bmjopen-2019-031825), 2020-04-06
Supplement: bmjopen-2019-031825.draft_revisions.pdf [file bmjopen-2019-031825.draft_revisions.pdf]

# BMJ Open

BMJ Open is committed to open peer review. As part of this commitment we make the peer review history of every article we publish publicly available.

When an article is published we post the peer reviewers' comments and the authors' responses online. We also post the versions of the paper that were used during peer review. These are the versions that the peer review comments apply to.

The versions of the paper that follow are the versions that were submitted during the peer review process. They are not the versions of record or the final published versions. They should not be cited or distributed as the published version of this manuscript.

BMJ Open is an open access journal and the full, final, typeset and author-corrected version of record of the manuscript is available on our site with no access controls, subscription charges or pay-per-view fees (<http://bmjopen.bmj.com>).

If you have any questions on BMJ Open's open peer review process please email [info.bmjopen@bmj.com](mailto:info.bmjopen@bmj.com)

# BMJ Open

## Gender makes the difference in exertional heat illness: A Systematic Review

|                               |                                                                                                                                                                                                                                                                                                                                       |
|-------------------------------|---------------------------------------------------------------------------------------------------------------------------------------------------------------------------------------------------------------------------------------------------------------------------------------------------------------------------------------|
| Journal:                      | <i>BMJ Open</i>                                                                                                                                                                                                                                                                                                                       |
| Manuscript ID                 | bmjopen-2019-031825                                                                                                                                                                                                                                                                                                                   |
| Article Type:                 | Research                                                                                                                                                                                                                                                                                                                              |
| Date Submitted by the Author: | 20-May-2019                                                                                                                                                                                                                                                                                                                           |
| Complete List of Authors:     | Alele, Faith; James Cook University, College of Healthcare Sciences Malau-Aduli, Bunmi; James Cook University, College of Medicine and Dentistry Malau-Aduli, Aduli; James Cook University, College of Public Health, Medical and Veterinary Sciences Crowe, Melissa; James Cook University, Division of Tropical Health and Medicine |
| Keywords:                     | OCCUPATIONAL & INDUSTRIAL MEDICINE, ACCIDENT & EMERGENCY MEDICINE, Heat Stroke, Armed Forces, Women                                                                                                                                                                                                                                   |
|                               |                                                                                                                                                                                                                                                                                                                                       |

SCHOLARONE™  
Manuscripts

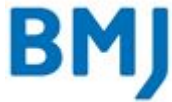

I, the Submitting Author has the right to grant and does grant on behalf of all authors of the Work (as defined in the below author licence), an exclusive licence and/or a non-exclusive licence for contributions from authors who are: i) UK Crown employees; ii) where BMJ has agreed a CC-BY licence shall apply, and/or iii) in accordance with the terms applicable for US Federal Government officers or employees acting as part of their official duties; on a worldwide, perpetual, irrevocable, royalty-free basis to BMJ Publishing Group Ltd ("BMJ") its licensees and where the relevant Journal is co-owned by BMJ to the co-owners of the Journal, to publish the Work in this journal and any other BMJ products and to exploit all rights, as set out in our [licence](#).

The Submitting Author accepts and understands that any supply made under these terms is made by BMJ to the Submitting Author unless you are acting as an employee on behalf of your employer or a postgraduate student of an affiliated institution which is paying any applicable article publishing charge ("APC") for Open Access articles. Where the Submitting Author wishes to make the Work available on an Open Access basis (and intends to pay the relevant APC), the terms of reuse of such Open Access shall be governed by a Creative Commons licence – details of these licences and which [Creative Commons](#) licence will apply to this Work are set out in our licence referred to above.

Other than as permitted in any relevant BMJ Author's Self Archiving Policies, I confirm this Work has not been accepted for publication elsewhere, is not being considered for publication elsewhere and does not duplicate material already published. I confirm all authors consent to publication of this Work and authorise the granting of this licence.

# 1 Gender makes the difference in exertional heat illness: A Systematic Review

2 **Type of article:** Review

## 3 **Authors**

4 Faith O. Alele<sup>1\*</sup>

5 MPHTM, MBBS

6 [Faith.alele@my.jcu.edu.au](mailto:Faith.alele@my.jcu.edu.au)

7 [+61426156266](tel:+61426156266)

8  
9 A/Prof Bunmi S. Malau-Aduli<sup>2</sup>

10 PhD, MSc, BSc (Hons)

11 [Bunmi.malauaduli@jcu.edu.au](mailto:Bunmi.malauaduli@jcu.edu.au)

12  
13 A/Prof Aduli EO. Malau-Aduli<sup>3</sup>

14 PhD, MSc, BSc (Hons)

15 [Aduli.malauaduli@jcu.edu.au](mailto:Aduli.malauaduli@jcu.edu.au)

16  
17 Dr Melissa Crowe<sup>4</sup>

18 PhD, BSc (Hons)

19 [Melissa.crowe@jcu.edu.au](mailto:Melissa.crowe@jcu.edu.au)

20  
21 <sup>1</sup>College of Healthcare Sciences, James Cook University, Townsville QLD 4811, Australia

22 <sup>2</sup>College of Medicine and Dentistry, James Cook University, Townsville QLD 4814, Australia

23 <sup>3</sup>College of Public Health, Medical and Veterinary Sciences, James Cook University,  
24 Townsville QLD 4811, Australia

25 <sup>4</sup>Division of Tropical Health and Medicine, James Cook University, Townsville QLD 4811,  
26 Australia

## 27 28 **\*Corresponding author:**

29 Faith O. Alele, College of Healthcare Sciences, James Cook University, Townsville QLD 4811,  
30 Australia, Townsville QLD 4811, Australia

31 Tel: [+61426156266](tel:+61426156266)

32 Email: [faith.alele@my.jcu.edu.au](mailto:faith.alele@my.jcu.edu.au)

33  
34 Word count: 3992

## 35 36 **Abstract**

1  
2  
3 37 **Objectives:** The aim of this review is to describe the epidemiology of all heat related illnesses  
4  
5 38 in women compared to men in the armed forces and to identify risk factors and gender  
6  
7 39 differences in heat illness and heat tolerance.  
8  
9

10  
11 40 **Design:** A systematic review of multiple databases (MEDLINE, Emtree, CINAHL,  
12  
13 41 PsycINFO, Informit, and Scopus) was conducted from inception of the databases to the 1<sup>st</sup> of  
14  
15 42 April 2019.  
16  
17

18 43 **Eligibility criteria:** Studies investigating heat illness and heat tolerance in women in the armed  
19  
20 44 forces.  
21  
22

23 45 **Results:** Twenty-seven (27) studies were included in the review. Measures used to describe  
24  
25 46 heat illness were proportions and incidence rates. The average proportion of heat stroke events  
26  
27 47 in women was lower than in men (12% vs 88%). In addition, men had significantly higher heat  
28  
29 48 stroke incidence compared to women (median = 0.27, interquartile range = 0.11 vs median =  
30  
31 49 0.15, interquartile range = 0.03; U= 10.50, P < 0.001). However, the incidence of other heat  
32  
33 50 injuries was similar between men and women (median = 1.41, interquartile range = 0.37 vs  
34  
35 51 median = 1.62, interquartile range = 0.97; U = 47.50, P = 0.058). Investigated factors associated  
36  
37 52 with heat illness and tolerance included gender, age, level of education, ethnicity, body mass  
38  
39 53 index (BMI), maximal aerobic capacity (VO<sub>2max</sub>), positive sickle cell trait, being in service for  
40  
41 54 less than 1 year, and unit of service. Women were more likely to be heat intolerant compared  
42  
43 55 to men using the standard heat tolerance test.  
44  
45  
46  
47  
48

49 56 **Conclusion:** The findings of this review suggest that women have a greater risk of heat illness  
50  
51 57 and show higher rates of heat intolerance than men on the standard heat tolerance test. There  
52  
53 58 is a need to re-evaluate the heat tolerance test protocol for women with further investigation of  
54  
55 59 the factors that make women more susceptible to heat illness than men.  
56  
57  
58

59 60 **Article summary**

## 61 **Strengths and limitations of this study**

- 62 • This is the first known systematic review investigating the impact of gender on  
63 exertional heat illness and heat tolerance in the armed forces.
- 64 • We conducted a comprehensive search and identified potential risk factors that are  
65 associated with exertional heat illness.
- 66 • Most of the included studies utilized retrospective data with an increased likelihood of  
67 misclassification bias which may have underestimated or overestimated the association  
68 between heat-related illness and risk factors.
- 69 • We could not perform a metaanalysis due to the heterogeneity in the study designs.

70 **Trial registration** None

## 71 **Key words**

72 Heat stress; Heat stroke; Heat exhaustion; Heat tolerance; Women; Armed Forces

73

74

75

76

77

78

79

## 80 **Introduction**

1  
2  
3 81 Heat illness is a spectrum of disorders that arise when there is a disruption in the regulation of  
4  
5 82 body temperature.[1] These illnesses may arise from a combination of prolonged exposure to  
6  
7 83 heat/humidity and increased metabolic activity.[2] When body temperature rises, conduction,  
8  
9 84 convection, radiation and evaporation mechanisms help to cool the body and maintain  
10  
11 85 normothermia.[1] However, heat loss is susceptible to prevailing environmental conditions and  
12  
13 86 type of clothing worn. Without adequate cooling a number of syndromes may occur ranging  
14  
15 87 from heat cramps, heat syncope and heat exhaustion through to heat stroke, a potentially life-  
16  
17 88 threatening disorder.[1]  
18  
19  
20  
21  
22 89 Heat stroke is a medical emergency.[3] It is characterized by elevated core temperature of 40°C  
23  
24 90 and above, central nervous system disturbances and multi-organ damage that may result in  
25  
26 91 death.[3] Heat stroke has been classified as either classic or exertional.[4] Classical heat stroke  
27  
28 92 is insidious in onset and occurs in vulnerable populations such as young children, the elderly  
29  
30 93 and patients with chronic diseases.[5] On the other hand, exertional heat stroke occurs more  
31  
32 94 rapidly and affects apparently healthy, active people such as athletes, factory workers,  
33  
34 95 construction workers, agricultural workers, firefighters and military recruits.[6, 7] The workers  
35  
36 96 in these industries often require high levels of physical exertion to perform jobs and tasks. A  
37  
38 97 combination of rigorous activities and extreme exposure to heat places the workers at increased  
39  
40 98 risk of heat stress and heat stroke.[8]  
41  
42  
43  
44  
45  
46 99 However, the ability to cope with heat stress varies between individuals.[3] Individuals who  
47  
48 100 are unable to cope with heat stress may have elevated body temperature under extreme  
49  
50 101 conditions in the heat, which may cause heat exhaustion or heat stroke.[3] The inability to  
51  
52 102 withstand heat stress during exertion in hot environments is defined as heat intolerance.[3]  
53  
54 103 Evidence in the published literature suggests that heat stroke may be preceded or accompanied  
55  
56 104 by a state of heat intolerance.[3] The Israeli Defence Force developed the heat tolerance test  
57  
58 105 in 1979 as an index of the ability of soldiers to cope with exertional heat.[9] Individuals who

1  
2  
3 106 have suffered heat stroke are sent for a heat tolerance test after a minimum recovery period of  
4  
5 107 6 to 8 weeks as part of the return to duty process.[9] Criteria used to define heat intolerance  
6  
7 108 include an elevation in rectal temperature above 38.5°C and heart rate above 150 bpm or when  
8  
9 109 rectal temperature or heart rate fail to stabilize during the test. The current heat tolerance test  
10  
11 110 criteria are based on previous studies by Shapiro et al.[10] and Epstein et al.,[11] which utilised  
12  
13 111 only male military participants.[10, 11]  
14  
15  
16

17 112 Globally, increasing numbers of women are joining the armed forces following the inclusive  
18  
19 113 approach to recruiting and creation of more roles for women.[12] Women are required to  
20  
21 114 operate in austere environments with heat illnesses becoming more frequent.[12] This has  
22  
23 115 raised the question about gender differences in thermoregulation during heat stress.[12] During  
24  
25 116 prolonged heat exposure, the body's thermal inertia is determined by complex interactions  
26  
27 117 between the body's morphological characteristics (body composition, body mass and surface  
28  
29 118 area) and heat load. Evidence suggests that women differ from men in thermal responses to  
30  
31 119 heat.[13] These difference may be because women have a lower rate of whole body evaporative  
32  
33 120 heat loss, higher body fat mass, body mass ratio,[14] number of sweat glands and lower aerobic  
34  
35 121 fitness.[15] In addition, hormonal variations due to menstrual cyclic patterns and the use of  
36  
37 122 contraceptive pills may all be associated with the differences in response to heat stress.[16]  
38  
39  
40  
41  
42

43 123 Although these gender differences exist, they have not been considered when conducting the  
44  
45 124 heat tolerance test (HTT) for women who have had a heat stroke.[15] Furthermore, heat illness  
46  
47 125 can impact defence operational effectiveness and may result in acute loss of manpower and  
48  
49 126 possible medical discharge from service.[17] A previous review on the risk of heat illness in  
50  
51 127 women compared with men focused on the general population.[18] The findings of the review  
52  
53 128 suggested that men are at increased risk of heat illness compared to women.[18] However,  
54  
55 129 there is a dearth of research investigating heat illness in women compared to men in the armed  
56  
57  
58  
59  
60 130 forces.



1  
2  
3 131 Therefore, the aims of this systematic review are:  
4  
5

6 132 To describe the epidemiology of heat stroke and other heat related illnesses in women  
7  
8 133 compared to men in the armed forces.  
9

10 134 To identify predisposing risk factors and gender differences in heat illness and heat  
11  
12 135 tolerance  
13  
14

15 136  
16  
17

## 18 19 137 **Methods**

### 20 21 22 138 **Search Strategy**

23  
24  
25 139 This review utilised the Preferred Reporting Items for Systematic Review and Meta-analysis  
26  
27 140 protocols (PRISMA-P) 2015 statement[19] and explored all literature published in English  
28  
29 141 from inception of the different databases to the 1<sup>st</sup> of April 2019. Databases searched included  
30  
31 142 MEDLINE, CINAHL, PsycINFO, Emcare, Informit and Scopus. A preliminary search was  
32  
33 143 conducted in Medline, Emcare and CINAHL to identify relevant key words contained in the  
34  
35 144 titles, abstracts and subject descriptors. These search terms were used to conduct the search in  
36  
37 145 other databases without subject headings. The search strategy used in Medline is presented in  
38  
39 146 supplemental table 1. No review protocol exists.  
40  
41  
42  
43

### 44 147 **Eligibility criteria**

45  
46  
47 148 Studies included in the review were assessed according to the following inclusion criteria: Peer-  
48  
49 149 reviewed literature comparing heat illness in women to men in the Armed Forces. Exclusions  
50  
51 150 included literature discussing heat illness in other occupations, or studies where data on heat  
52  
53 151 illness in women could not be separated from men or studies reporting heat illness in men or  
54  
55 152 literature reviews, conference abstracts and grey literature. In addition, additional primary data  
56  
57  
58  
59  
60

1  
2  
3 153 sources were identified from the reference lists of the included studies using a hand-search  
4  
5 154 technique.

### 8 155 **Selection of studies and data extraction**

10  
11 156 FA and BMA identified all included studies and data extraction was performed using a standard  
12  
13 157 abstraction form. Data extracted from the studies included: study location and design,  
14  
15 158 population, proportion and incidence of heat illnesses, factors associated with heat illness and  
16  
17 159 heat tolerance, and heat tolerance in men and women. All authors cross-checked the extracted  
18  
19 160 data for consistency.

### 23 161 **Quality assessment**

24  
25  
26 162 The methodological quality assessment was assessed by FA in consultation with MC using the  
27  
28 163 modified quality assessment tool for studies with diverse designs (QATSDD) critical appraisal  
29  
30 164 tool.[20] Any disagreement about any article was reviewed by BMA and AMA and discussed  
31  
32 165 until consensus was reached. The QATSDD tool is a 16-item tool which assesses the quality  
33  
34 166 of diverse studies (both quantitative and qualitative).[20] The tool was modified to exclude two  
35  
36 167 items relating to qualitative studies as well as two items relating to quantitative studies that  
37  
38 168 were not applicable to the studies included in the review. The items excluded comprised  
39  
40 169 statistical assessment of reliability and validity of measurement tool(s) (Quantitative only), fit  
41  
42 170 between stated research question and format and content of data collection tool e.g. interview  
43  
44 171 schedule (Qualitative), assessment of reliability of analytical process (Qualitative only) and  
45  
46 172 evidence of user involvement in design. Each criterion in the modified QATSDD tool was  
47  
48 173 awarded a score of 0 to 3 with 0 = not at all, 1 = very slightly, 2 = moderately and 3 = complete.  
49  
50 174 The scores of each criterion were summed to assess the methodological quality of included  
51  
52 175 studies with a maximum score of 36. The criteria included were (1) theoretical framework; (2)  
53  
54 176 statement of aims/objectives; (3) description of research setting; (4) evidence of sample size;

1  
2  
3 177 (5) representative sample of target group of a reasonable size, (6) description of procedure for  
4  
5 178 data collection; (7) rationale for choice of data collection tool(s); (8) detailed recruitment data;  
6  
7  
8 179 (9) fit between research question and method of data collection (Quantitative only); (10) fit  
9  
10 180 between research question and method of analysis (Quantitative only); (11) good justification  
11  
12 181 for analytical method selected; and (12) strengths and limitations. For ease of interpretation,  
13  
14 182 the scores were converted to percentages and classified as low (<50%), medium (50-80%) or  
15  
16 183 high (>80%) quality of evidence.  
17  
18  
19

## 20 184 **Data analysis and synthesis**

21  
22  
23 185 Data analysis was conducted using SPSS version 25. Heat illness was reported as either all  
24  
25 186 heat related illnesses or heat stroke versus other heat illnesses. Measures used to describe heat  
26  
27 187 illness were proportions and rates. The mean proportion of heat stroke and other heat illness  
28  
29 188 were reported for studies published between 1995 and 1997. A Mann-Whitney U test was used  
30  
31 189 to assess the median differences in the incidence of heat stroke and other heat illnesses between  
32  
33 190 men and women from 2006 to 2018. Level of significance was set at 0.05. The incidence rates  
34  
35 191 and proportions of all heat related illness (where heat stroke was not differentiated from other  
36  
37 192 heat illnesses) were reported using frequency tables. Due to the heterogeneity of the included  
38  
39 193 studies, a meta-analysis was not conducted.  
40  
41  
42  
43  
44  
45

194

## 46 195 **Results**

47  
48 196 An initial search identified 3801 papers. After removing duplicates, screening titles and  
49  
50 197 abstracts, 47 papers remained for full text review with twenty-seven (27) included in the  
51  
52 198 systematic review (Figure 1). Twenty-five (25) of the reviewed articles originated from the  
53  
54 199 United States of America, while the other two studies were conducted in the United Kingdom  
55  
56 200 and Israel respectively (Supplemental Table 2). All included studies were conducted among  
57  
58  
59  
60

1  
2  
3 201 armed forces personnel, however, one study focused on armed force personnel with sickle cell  
4  
5 202 trait (SCT),[21] while another study included university staff and armed forces personnel in  
6  
7 203 the study.[22] Twenty-four (24) articles examined heat illnesses and injuries in women and  
8  
9 204 men. Eight (8) of these studies described all heat related illnesses in men and women,[21, 23-  
10  
11 205 29] while 16 studies included information on heat stroke and other heat injuries (including  
12  
13 206 “heat exhaustion” and “unspecified effects of heat”) in relation to both genders.[30-45] Six (6)  
14  
15 207 studies identified risk factors associated with heat stroke,[21, 25, 28, 29, 46, 47] and 2 studies  
16  
17 208 compared heat tolerance in men and women.[15, 47]

### 209 **Epidemiology of heat stroke and other heat related illnesses in women compared to men**

210 Table 1 shows the proportions and incidences of all heat-related illness in men and women in  
211 the armed forces. Six (6) studies reported higher incidences and proportions of heat illness in  
212 men compared to women[21, 23, 25, 26, 28, 29] while two studies reported higher incidences  
213 of heat illness in women.[24, 27] Between 1995 and 1997, the mean proportion of all reported  
214 heat stroke events in women was approximately 12% compared to 88% of heat stroke events  
215 in men. Similarly, men reported a higher mean proportion of heat exhaustion (96%) compared  
216 to women (4%).[31-33] Between 2006 and 2018, overall median incidence for heat illness was  
217 higher than heat stroke for both men and women (Figure 2). However, men had significantly  
218 higher heat stroke incidence compared to women with a mean rank of 19.19 for men and 7.81  
219 for women (median = 0.27, IQR = 0.11 vs median = 0.15 respectively, IQR = 0.03; U = 10.50,  
220  $P < 0.001$ ). Although, the incidence of other heat injuries was similar between men and women;  
221 there was a trend for women to report a slightly higher median incidence of other heat injuries  
222 compared to men (median = 1.41 IQR = 0.37 vs median = 1.62, IQR = 0.97; mean rank = 10.65  
223 vs 16.35, U = 47.50, P = 0.058).

### 224 **Table 1: Proportion and incidence of heat related illnesses in women and men in the** 225 **Defence Force**

| Reference, year                              | Country | Study design               | Study duration         | Population                                                                                                              | All heat injuries |                 |
|----------------------------------------------|---------|----------------------------|------------------------|-------------------------------------------------------------------------------------------------------------------------|-------------------|-----------------|
|                                              |         |                            |                        |                                                                                                                         | Women             | Men             |
| Dickson, 1994[23]                            | UK      | Descriptive epidemiology   | 1981-1991 (10yrs)      | Royal Air force, Royal Navy and Army (1448 cases)                                                                       | 11.43*            | 41.87*          |
| Army Medical Surveillance Activity, 1998[24] | USA     | Descriptive epidemiology   | 1997 – 1998 (1 year)   | US Army (1433 cases) 1997                                                                                               | 12.8†             | 8.6†            |
| Army Medical Surveillance Activity, 2000[27] | USA     | Descriptive epidemiology   | 1997 – 1999 (2 years)  | US Army and Marine Corps (3386 cases)                                                                                   | 15.8†             | 12.0†           |
| Army Medical Surveillance Activity, 2002[25] | USA     | Descriptive epidemiology   | 1990 – 1997 (7 years)  | US Army (2290 cases)                                                                                                    | 14.0%§            | 86.0%§          |
| Army Medical Surveillance Activity, 2003[26] | USA     | Case control               | 1998 – 2001 (3 years)  | US Army (5021 cases and 10,042 controls)                                                                                | 20.7%§            | 79.3%§          |
| Army Medical Surveillance Activity, 2003[26] | USA     | Descriptive epidemiology   | 2002 (1 year)          | US Army (1816 cases)                                                                                                    | 3.5†              | 5.1†            |
| Carter et al, 2005[28]                       | USA     | Cross-sectional            | 1980 – 2002 (22 years) | US Army (5246 cases)                                                                                                    | 13.7%§            | 86.3%§          |
| Bedno et al, 2014[29]                        | USA     | Analytical cross-sectional | 2005 - 2006            | US Armed Forces (80 exertional heat illness cases) 9455 men 1913 women                                                  | 0.680%            | 0.71%           |
| Singer et al, 2018[21]                       | USA     | Retrospective cohort       | 1992 - 2012            | SCT and non-SCT US Armed Forces<br>SCT: 214 exertional heat illness cases<br>Non-SCT: 577 exertional heat illness cases | 13.89†<br>13.14†  | 14.79†<br>7.79† |

226 § Proportions and incidences reported are of the total cases reported in the articles

227 \* Incidence rate reported per 100,000 person-years; † Incidence rate per 100,000 person- months;

228 † Incidence rate reported per 1000 person-years

229 UK = United Kingdom; USA = United States of America

230

231

232

233

## 234 Risk factors for heat illness and heat intolerance

1  
2  
3 235 As shown in Table 2, six (6) studies identified the risk factors associated with heat-related  
4  
5 236 illness and heat tolerance.[21, 25, 28, 29, 46, 47] However, one study identified the risk for  
6  
7 237 heat illness in association with SCT status.[21] The odds of females experiencing heat illness  
8  
9 238 ranged from 1.04 to 1.36 and were 3.68 times more likely to be heat intolerant (using the  
10  
11 239 standard heat tolerance test protocol) compared to males.[21, 25, 28, 29, 47] Other identified  
12  
13 240 risk factors for heat illness (Table 2) included younger and older age,[21, 25] lower level of  
14  
15 241 education,[25] ethnicity,[25, 28] higher body mass index (BMI),[46] lower VO<sub>2max</sub>,[47] being  
16  
17 242 SCT positive,[21] being in service for less than 1 year,[25] and serving in combat units as an  
18  
19 243 infantry or gun crew soldier.[25, 28]  
20  
21  
22  
23  
24  
25  
26  
27  
28  
29  
30  
31  
32  
33  
34  
35  
36  
37  
38  
39  
40  
41  
42  
43  
44  
45  
46  
47  
48  
49  
50  
51  
52  
53  
54  
55  
56  
57  
58  
59  
60

256 **Table 2: Risk factors associated with heat illness and tolerance**

| Reference, year                              | Country | Study design and duration                           | Study population                                                                                                        | Risk factors                          | OR or IDR (95% CI)  |
|----------------------------------------------|---------|-----------------------------------------------------|-------------------------------------------------------------------------------------------------------------------------|---------------------------------------|---------------------|
| Army Medical Surveillance Activity, 2002[25] | USA     | Case-control<br>1998 – 2001<br>(3 years)            | US Army<br>5021 cases and 10,042 controls                                                                               | Female                                | 1.5 (1.4 - 1.7)     |
|                                              |         |                                                     |                                                                                                                         | Age < 20 years                        | 2.1 (1.4 - 3.1)     |
|                                              |         |                                                     |                                                                                                                         | Other ethnicity*                      | 1.2 (1.0 - 1.4)     |
|                                              |         |                                                     |                                                                                                                         | Combat                                | 1.5 (1.4 - 1.6)     |
|                                              |         |                                                     |                                                                                                                         | Lower level of education              | 2.0 (1.2 – 3.1)     |
| Carter et al, 2005[28]                       | USA     | Cross-sectional<br>1980 – 2002<br>(22 years)        | US Army<br>5246 cases of heat illness;<br>4521 males and 725 females                                                    | Less than 1 year of service           | 2.3 (2.0 – 2.6)     |
|                                              |         |                                                     |                                                                                                                         | Female                                | 1.21 (1.09 – 1.40)  |
|                                              |         |                                                     |                                                                                                                         | Infantry soldiers and gun crew men    | 2.69 (1.71 – 2.89)  |
|                                              |         |                                                     |                                                                                                                         | African and Hispanic ethnicity        | 0.76 (0.71 – 0.82)  |
| Wallace et al, 2006[46]                      | USA     | Case-control<br>1988 – 1996<br>(8 years)            | US Marine Corps<br>Male (627 cases and 1679 controls)<br>Female (49 cases and 123 controls)                             | Northern state of origin              | 1.69 (1.42 – 1.90)  |
|                                              |         |                                                     |                                                                                                                         | BMI ≥ 26 kg/m <sup>2</sup> (males)    | 2.10 (1.59 – 2.78)  |
|                                              |         |                                                     |                                                                                                                         | Run time ≥ 12.9 minutes (males)       | 5.61 (3.73 – 8.45)  |
| Bedno et al, 2014[29]                        | USA     | Analytical cross-sectional<br>2005 - 2006           | US Armed Forces<br>9455 men (67 exertional heat illness cases)<br>1913 women (13 exertional heat illness cases)         | Run time ≥ 6.9 minutes (females)      | 5.30 (1.59 – 17.64) |
|                                              |         |                                                     |                                                                                                                         | Female                                | 1.04 (0.57 – 1.89)  |
| Kazman et al, 2015[47]                       | USA     | Analytical cross-sectional<br>(Duration not stated) | Military and university community members<br>55 males and 20 females                                                    | Female                                | 3.68 (1.21 – 11.24) |
|                                              |         |                                                     |                                                                                                                         | VO <sub>2max</sub>                    | 0.9 (0.76 – 0.96)   |
| Singer et al, 2018[21] †                     | USA     | Retrospective cohort study                          | SCT and non-SCT US Armed Forces<br>SCT: 214 exertional heat illness cases<br>Non-SCT: 577 exertional heat illness cases | Female                                | 1.36 (1.17 – 1.50)  |
|                                              |         |                                                     |                                                                                                                         | SCT positive                          | 1.24 (1.06 – 1.45)  |
|                                              |         |                                                     |                                                                                                                         | Age at enlistment: 30+ years          | 1.57 (1.07 – 2.33)  |
|                                              |         |                                                     |                                                                                                                         | Marines vs Army                       | 1.51 (1.15 – 2.13)  |
|                                              |         |                                                     |                                                                                                                         | Occupation: Combat vs repair/engineer | 1.57 (1.15 – 2.13)  |

257 \*non- White, non-Black, non-Hispanic; OR = Odds ratio; IDR = Incidence density ratio; BMI= Body Mass Index; CI=Confidence Interval; USA = United States of America; † The risk factors  
258 associated with EHI and SCT status

1  
2  
3 **259 Heat tolerance in women and men**  
4  
5

6 260 Two studies compared heat tolerance in males and females using the most commonly used test,  
7  
8 261 the HTT developed by the Israeli Armed Forces.[15, 47] The findings reported in Table 3  
9  
10 262 revealed that a greater proportion of women were classified as heat intolerant compared to men  
11  
12 263 (45% vs 18% and 66% vs 25.79%).[15, 47] In addition, women had higher baseline  
13  
14 264 temperature (37.18°C vs 37.07°C and 37.1°C vs 36.9°C respectively)[15, 47] and heart rate  
15  
16 265 (82.11 bpm vs 73.94 bpm and 76 bpm vs 68 bpm). In addition, the endpoint heart rates for  
17  
18 266 women were higher compared to their male counterparts (141.5 bpm vs 126.5 bpm and 137  
19  
20 267 bpm vs 122 bpm respectively).[15, 47] The end point temperature varied between the two  
21  
22 268 studies; one study reported a higher endpoint temperature for females[15] and the other study  
23  
24 269 reported similar endpoint temperature between males and females.[47]  
25  
26  
27  
28  
29  
30  
31  
32  
33  
34  
35  
36  
37  
38  
39  
40  
41  
42  
43  
44  
45  
46  
47  
48  
49  
50  
51  
52  
53  
54  
55  
56  
57  
58  
59  
60



270 **Table 3: Heat tolerance in women and men**

| Reference, year           | Country | Study design and duration                                 | Study population                                                            | Parameters                      | Women         | Men           |
|---------------------------|---------|-----------------------------------------------------------|-----------------------------------------------------------------------------|---------------------------------|---------------|---------------|
| Druyan et al, 2012[15]    | Israel  | Retrospective cross-sectional<br>2008 – 2010<br>(2 years) | 170 males and 9<br>females                                                  | Heat intolerance rate           | 66.6%         | 25.79%        |
|                           |         |                                                           |                                                                             | Baseline T <sub>rec</sub> (° C) | 37.18 ± 0.09  | 37.07 ± 0.02  |
|                           |         |                                                           |                                                                             | Endpoint T <sub>rec</sub> (° C) | 38.14 ± 0.14  | 37.93 ± 0.03  |
|                           |         |                                                           |                                                                             | Baseline HR (bpm)               | 82.11 ± 4.88  | 73.94 ± 1.17  |
|                           |         |                                                           |                                                                             | Endpoint HR (bpm)               | 141.50 ± 7.84 | 126.50 ± 1.79 |
| Kazman et al,<br>2015[47] | USA     | Analytical cross-sectional<br>(duration not stated)       | Military and university<br>community members;<br>55 males and 20<br>females | Heat intolerance rate           | 45%           | 18%           |
|                           |         |                                                           |                                                                             | Baseline T <sub>rec</sub> (° C) | 37.1 ± 0.4    | 36.9 ± 0.4    |
|                           |         |                                                           |                                                                             | Endpoint T <sub>rec</sub> (° C) | 38.1 ± 0.4    | 38.1 ± 0.4    |
|                           |         |                                                           |                                                                             | Baseline HR (bpm)               | 76 ± 15.0     | 68 ± 12.1     |
|                           |         |                                                           |                                                                             | Endpoint HR (bpm)               | 137 ± 20.1    | 122 ± 20.2    |

271 HR = Heart rate; Bpm = beats per minute; T<sub>rec</sub> = Rectal temperature; USA = United States of America

1  
2  
3 272 **Assessment of methodological quality**  
4  
5

6 273 The QATSDD scores ranged from 0 to 97.2% (Supplemental Table 3). Only six studies scored  
7  
8 274 above 50% and included details about recruitment, data analysis, strengths and limitations of  
9  
10 275 the research. The other studies had lower scores because they lacked detailed justification for  
11  
12 276 the analytical methods, data collection, analysis, strengths and limitations. However, results of  
13  
14 277 the methodological assessment should be interpreted with caution. Although the tool assesses  
15  
16 278 methodological quality, it is more likely to be dependent on how the paper was written. In this  
17  
18 279 review, 80% of the studies included were military reports on heat-related illnesses in the Armed  
19  
20 280 Forces. These reports were published in a peer-reviewed journal and were retrospective  
21  
22 281 analyses of data collected by Defence Medical Surveillance Systems. These studies may not  
23  
24 282 have reported details about data collection, strengths and limitations, but they presented valid  
25  
26 283 information on heat- related illness.  
27  
28  
29  
30  
31  
32  
33  
34  
35  
36  
37  
38  
39  
40  
41  
42  
43  
44  
45  
46  
47  
48  
49  
50  
51  
52  
53  
54  
55  
56  
57  
58  
59  
60

## 284 Discussion

285 The findings of this review suggest a higher rate of heat stroke in men compared to women in  
286 the armed forces. On the other hand, the incidence of other exertional heat injuries (heat  
287 exhaustion and unspecified heat illnesses) were similar for both men and women. However,  
288 women were more likely to be heat intolerant compared to men. Other risk factors found to be  
289 associated with exertional heat illness include age, lower level of education, ethnicity, higher  
290 BMI, lower  $VO_{2max}$ , positive SCT, shorter duration of service, and service unit. The association  
291 between these factors and exertional heat illness is weak given the small number of articles that  
292 investigated the relationship.

293 The reported higher incidence of heat stroke in men compared to women could possibly  
294 indicate that men may have comparatively tolerated working in the heat beyond the endurance  
295 limits than women.[17] Conversely, the women may not have ignored the early warning signs  
296 of heat illness and may have sought earlier treatment compared to men. This reinforces the  
297 presumption that women are more inclined to make use of health services and report ill health  
298 than men.[48] In addition, the consultation rates of men were 30% lower than women,  
299 confirming the assumption that men are less likely to consult and may present at a later stage  
300 with more severe forms of diseases.[48] Although, previously published literature have  
301 reported a higher rate of all types of heat illnesses in men in the general population (including  
302 some armed forces personnel) compared to women; heat stroke was not considered separately  
303 from other forms of heat illnesses.[18]

304 However, despite the lower rate of heat stroke, women had a greater risk of heat illness and  
305 were more likely to be heat intolerant than men.[21, 25, 28, 29, 47] The higher risk of exertional  
306 heat illness in women may likely be due to differences in physiological and physical  
307 characteristics between men and women.[49] Physiological characteristics such as hormones,

1  
2  
3 308 use of contraceptive pills and lower evaporative heat loss may make women more susceptible  
4  
5 309 to heat illness. [14, 16] Physical characteristics such as lower aerobic fitness and greater body  
6  
7 310 fat are predictors of exertional heat illness.[49] Generally, men have less body fat and greater  
8  
9 311 lean body mass compared to women. Furthermore, women have lower aerobic fitness levels  
10  
11 312 and lower overall work capacity which may contribute to the increased risk of exertional heat  
12  
13 313 illness.[49]

14  
15  
16  
17 314 Other risk factors for heat illness and intolerance identified in the studies include higher  
18  
19 315 BMI,[46] lower  $VO_{2max}$ ,[47] age,[21, 25] lower level of education,[25] non-White, non-Black,  
20  
21 316 non-Hispanic ethnic groups,[25] less than one year of service,[25] service unit.[25, 28] and  
22  
23 317 positive SCT.[21] Individuals with higher BMI (indicating higher body fat) have been reported  
24  
25 318 to be at increased risk of exertional heat illness and are less heat tolerant.[50] Evidence shows  
26  
27 319 that high body fat increases metabolic heat production and decreases heat loss leading to heat  
28  
29 320 illness.[51] However, individuals with a low BMI may or may not be fit. Individuals with low  
30  
31 321 aerobic fitness levels are likely to exert themselves beyond their physical limit and are at  
32  
33 322 increased risk of heat illness.[51] During exercise, relative physiological strain is increased,  
34  
35 323 peripheral blood flow decreases which in turn hinders thermoregulation and increasing the risk  
36  
37 324 of heat illness.[51]

38  
39  
40  
41  
42  
43 325 The association between age, duration of service, occupational roles, level of education and  
44  
45 326 heat illness may be explained by the level of aerobic fitness. Age as a risk factor varied in this  
46  
47 327 review, with younger age and older age (at enlistment) considered as factors that increase the  
48  
49 328 risk of heat illness.[21, 25] Evidence suggests that aerobic fitness decreases with older age,  
50  
51 329 especially if older adults are sedentary.[52] However, aerobic fitness improves with regular  
52  
53 330 physical exercise and the age related differences between younger and older adults are  
54  
55 331 reversed.[53] The younger Armed Forces personnel in the review had been in service for less  
56  
57 332 than a year and may not be as physically fit as the older and long serving personnel.[25] The  
58  
59  
60

1  
2  
3 333 physical fitness requirements for recruits vary from the fitness standards for longer serving  
4  
5 334 personnel. For example, in Australia, Army recruits are required to pass the pre-enlistment  
6  
7 335 fitness assessment (PFA) which comprises of push-ups, sit-ups and the beep test during the  
8  
9 336 initial stages of their training.[54] In contrast, the older serving personnel undergo regular  
10  
11 337 fitness training which consists of push-ups, sit-ups, 2.4 km run, 5km walk and weight  
12  
13 338 lifting.[55] The intense and regular training the older personnel have undergone may be  
14  
15 339 responsible for their higher level of fitness and lower risks of heat illness.[56] Furthermore,  
16  
17 340 occupational roles such as serving as in Marine Corps and physically demanding jobs such as  
18  
19 341 infantry, combat and gun crew had an increased risk of heat illness compared to personnel in  
20  
21 342 administrative or support jobs. This may be associated with the rigorous and strenuous training  
22  
23 343 requirements for these jobs.[29]

24  
25  
26  
27  
28  
29 344 Similarly, the association between lower level of education and heat illness may be due to  
30  
31 345 aerobic fitness. Research has identified educational attainment as a major predictor of health  
32  
33 346 outcomes.[57] Education provides the opportunity for individuals to learn more about their  
34  
35 347 health and to make healthy lifestyle choices. Individuals with a higher level of education are  
36  
37 348 more likely to engage in healthy behaviours such as healthy diet and regular exercise.[57]  
38  
39 349 Regular exercise is necessary to maintain and improve aerobic fitness.[58] High aerobic fitness  
40  
41 350 may reduce the risk of exertional heat illness; however, some fit individuals may be at increased  
42  
43 351 risk of heat illness because of their ethnic status. The effect of ethnicity on heat illness varied  
44  
45 352 in this review. One study reported that minor ethnic groups (non-White, non-Black, non-  
46  
47 353 Hispanic) were more susceptible to heat illness[25], while another study reported that  
48  
49 354 Caucasians had an increased risk of heat illness compared to other ethnic groups.[28] Genetic  
50  
51 355 adaptation may play a role in the differences between ethnic groups.[59] Evidence shows that  
52  
53 356 a disruption in the cell protective mechanism of heat shock proteins may increase the risk of  
54  
55 357 heat illness.[59]

1  
2  
3 358 Another role genetics plays in predisposition to heat illness was evident in the review with SCT  
4  
5 359 positive armed force members at increased risk of exertional heat illness compared to SCT  
6  
7  
8 360 negative members.[21] SCT is an inherited blood disorder where an individual has a wild type  
9  
10 361 haemoglobin A and haemoglobin S. Individuals with the SCT are considered heterozygous for  
11  
12 362 the sickle cell mutation in the subunit beta gene of the haemoglobin.[60] Evidence has linked  
13  
14 363 positive SCT with exercise related adverse health outcomes such as exertional heat illness  
15  
16 364 (including exertional rhabdomyolysis, heat stroke and hyperthermia) in military personnel.[60]  
17  
18 365 However, the biological pathway by which SCT is associated with heat illness is still  
19  
20 366 unknown.[21] More in depth research is needed to elucidate the role of genetics in exertional  
21  
22  
23 367 heat illness.

24  
25  
26  
27 368 The risk of heat illness is dependent on thermal tolerance.[3] The HTT is conducted for  
28  
29 369 members of the armed forces after a heat stroke event as part of the return to duty process.[9]  
30  
31 370 The test criteria defines heat intolerance as peak rectal temperature > 38.5°C, peak heart rate  
32  
33 371 > 150 bpm, or the inability of these values to reach a plateau.[10, 11] However, using the  
34  
35 372 current protocol, there were more women in the armed forces classified as heat intolerant than  
36  
37 373 men.[15, 47] In addition, women had higher baseline temperature and heart rate compared to  
38  
39 374 men. The higher baseline core temperature increases the likelihood of being intolerant and at-  
40  
41 375 risk of heat illness.[47] Two studies acknowledge that sex differences in thermoregulation may  
42  
43 376 account for the higher intolerance rates in women.[15, 47] Given that the test protocol was  
44  
45 377 developed using male subjects, there is a need to re-evaluate the criteria for women to reduce  
46  
47 378 false positive results.[15, 47]

### 379 **Strengths and limitations**

380 To the authors' current knowledge, this is the first known systematic review investigating the  
381 impact of gender on exertional heat illness and heat tolerance in the armed forces. In addition,

1  
2  
3 382 we identified potential risk factors that are associated with exertional heat illness. However,  
4  
5 383 the heterogeneity in the study designs contributed to the variable methodological quality of the  
6  
7 384 included studies. Most of the articles in this review were military reports and may not be  
8  
9 385 considered of high methodological quality when assessed using a formal critical appraisal tool.  
10  
11  
12 386 In addition, most of the included studies utilized retrospective data as the data source with an  
13  
14 387 increased likelihood of incompleteness and inaccuracy. There is a likelihood that  
15  
16 388 misclassification bias could have been introduced into the studies. Three studies that explored  
17  
18 389 the risk factors associated with heat-related illness used retrospective data. [25, 28, 46] The  
19  
20 390 retrospective data may have been misclassified or incomplete at the time of entry and may have  
21  
22 391 introduced misclassification bias into the studies. This type of bias may underestimate or  
23  
24 392 overestimate the association between heat-related illness and risk factors. Although the risk  
25  
26 393 factors associated with heat illness were discussed; the review provided limited evidence of  
27  
28 394 these factors, given the few numbers of studies that investigated the association. Furthermore,  
29  
30 395 we included only studies published in English language; studies published in other languages  
31  
32 396 were excluded.

### 397 **Implication for policy and future research**

398 This systematic review demonstrates that there is limited research on exertional heat illness in  
399 women in the Armed Forces. Although men had a higher reported incidence of heat stroke; this  
400 may be a reflection that women are more likely to report poorer health earlier than men.[48]  
401 Further research is needed to establish if this reflects physiological or behavioural differences.  
402 Given that women have an increased risk of heat illness; they should be encouraged to  
403 participate in cardiovascular training programs to improve physical fitness. Nonetheless, more  
404 research is needed to understand the roles of underlying factors such as menstrual cycle phase,  
405 use of contraceptive pills and cardiovascular function in heat illness.[15, 47] Furthermore, the  
406 limited evidence revealed that more women were classified as heat intolerant using the current

1  
2  
3 407 heat tolerance test protocol. The current criteria may be unfair to women given that it was  
4  
5 408 developed using male participants. Therefore, it is important that the protocol is re-evaluated  
6  
7 409 for women or a new protocol is developed that puts the gender specific factors into  
8  
9 410 consideration.[15] The re-evaluation of the protocol for women would reduce false positive  
10  
11 411 results and the likelihood of ending the careers of these otherwise healthy women.[15]  
12  
13  
14

## 15 412 **Conclusion**

16  
17  
18 413 In conclusion, this review shows that men experienced a higher incidence of heat stroke but  
19  
20 414 women in the armed forces may have a greater risk of heat illness and are more likely to be  
21  
22 415 heat intolerant than their male counterparts using the standard heat tolerance test. Further  
23  
24 416 research is needed to evaluate the heat tolerance test protocol for women and to further  
25  
26 417 investigate the influence of gender differences on heat intolerance and heat illness.  
27  
28  
29

## 30 418 **Authors' contribution**

31  
32 419 All authors contributed substantially to the study concept, design, data extraction, quality  
33  
34 420 assessment and writing of the manuscript.  
35

36 421 **Conceptualization:** Faith O. Alele, Bunmi S. Malau-Aduli, Aduli E. Malau-Aduli, Melissa  
37  
38 422 Crowe

39 423 **Methodology:** Faith O. Alele, Bunmi S. Malau-Aduli, Aduli E. Malau-Aduli, Melissa Crowe

40 424 **Writing** - Original draft: Faith O. Alele

41  
42 425 **Writing – review & editing:** Faith O. Alele, Bunmi S. Malau-Aduli, Aduli E. Malau-Aduli,  
43  
44 426 Melissa Crowe

45  
46 427 All authors read and approved the manuscript for submission.  
47

48 428 **Funding:** The first author (FA) is supported by the Australian Government International  
49  
50 429 Research Training Program Scholarship

51 430 **Competing Interests:** The authors declare that they have no competing interests.

52  
53 431 **Patient consent for publication:** Not required

54  
55 432 **Data sharing statement:** There are no additional or unpublished data available.  
56  
57 433  
58  
59 434  
60



435 **References**

- 436 1. Becker JA, Stewart LK. Heat-related illness. *Am Fam Phys* 2011;83(11):1325-1330.
- 437 2. Xiang J, Peng B, Pisaniello D, Hansen A. Health impacts of workplace heat exposure:  
438 an epidemiological review. *Ind Health* 2014;52(2):91-101.
- 439 3. Epstein Y. Heat intolerance: Predisposing factor or residual injury? *Med Sci Sports  
440 Exerc* 1990;22(1):29-35.
- 441 4. Grubenhoff JA, du Ford K, Roosevelt GE. Heat-related illness. *Clin Pediatr Emerg Med*  
442 2007;8(1):59-64.
- 443 5. Mehta SR, Jaswal DS. Heat Stroke. *Medical journal, Armed Forces India*  
444 2003;59(2):140-3.
- 445 6. Hanna EG, Kjellstrom T, Bennett C, Dear K. Climate change and rising heat:  
446 population health implications for working people in Australia. *Asia Pac J Public Health*  
447 2011;23(2\_suppl):14S-26S.
- 448 7. Hollowell DR. Perceptions of, and reactions to, environmental heat: a brief note on  
449 issues of concern in relation to occupational health. *Glob Health Action* Published Online First:  
450 31 December 2010;3 doi:10.3402/gha.v3i0.5632.
- 451 8. Xiang J, Hansen A, Pisaniello D, Bi P. Extreme heat and occupational heat illnesses in  
452 South Australia, 2001–2010. *Occup Environ Med* 2015; 72:580-586 doi:10.1136/oemed-2014-  
453 102706 [published Online First 18 June 2015].
- 454 9. Moran DS, Heled Y, Still L, Laor A, Shapiro Y. Assessment of heat tolerance for post  
455 exertional heat stroke individuals. *Med Sci Monit* 2004;10(6):Cr252-7.
- 456 10. Shapiro Y, Magazanik A, Udassin R, Ben-Baruch G, Shvartz E, Shoenfeld Y. Heat  
457 intolerance in former heatstroke patients. *Ann Intern Med* 1979;90(6):913-6.
- 458 11. Epstein Y, Shapiro Y, Brill S. Role of surface area-to-mass ratio and work efficiency  
459 in heat intolerance. *J Appl Physiol Respir Environ Exerc Physiol* 1983;54(3):831-6.
- 460 12. Kazman JB, Heled Y, Lisman PJ, Druyan A, Deuster PA, O'Connor FG. Exertional  
461 Heat Illness: The Role of Heat Tolerance Testing. *Curr Sports Med Rep* 2013;12(2):101-5.
- 462 13. Kenney WL. A review of comparative responses of men and women to heat stress.  
463 *Environ Res* 1985;37(1):1-11.
- 464 14. Shapiro Y, Pandolf KB, Avellini BA, Pimental NA, Goldman RF. Physiological  
465 responses of men and women to humid and dry heat. *J Appl Physiol* 1980;49(1):1-8.
- 466 15. Druyan A, Makranz C, Moran D, Yanovich R, Epstein Y, Heled Y. Heat tolerance in  
467 women-Reconsidering the criteria. *Aviat Space Environ Med* 2012;83(1):58-60.
- 468 16. Tenaglia SA, McLellan TM, Klentrou PP. Influence of menstrual cycle and oral  
469 contraceptives on tolerance to uncompensable heat stress. *Eur J Appl Physiol Occup Physiol*  
470 1999;80(2):76-83.
- 471 17. Hunt AP, Billing DC, Patterson MJ, Caldwell JN. Heat strain during military training  
472 activities: The dilemma of balancing force protection and operational capability. *Temperature  
473 (Austin)* 2016;3(2):307-17.
- 474 18. Gifford RM, Todisco T, Stacey M, Fujisawa T, Allerhand M, Woods DR, et al. Risk of  
475 heat illness in men and women: A systematic review and meta-analysis. *Environ Res*  
476 2019;171:24-35.
- 477 19. Moher D, Shamseer L, Clarke M, Gherzi D, Liberati A, Petticrew M, et al. Preferred  
478 reporting items for systematic review and meta-analysis protocols (PRISMA-P) 2015  
479 statement. *Syst Rev* 2015;4(1):1.

- 1  
2  
3 480 20. Sirriyeh R, Lawton R, Gardner P, Armitage G. Reviewing studies with diverse designs:  
4 481 the development and evaluation of a new tool. *J Eval Clin Pract* 2012;18(4):746-52.
- 5 482 21. Singer DE, Byrne C, Chen L, Shao S, Goldsmith J, Niebuhr DW. Risk of Exertional  
6 483 Heat Illnesses Associated with Sickle Cell Trait in U.S. Military. *Mil Med* 2018;183(7-8):e310-  
7 484 e7 doi:10.1093/milmed/usx085 [published Online First: 8 February 2018].
- 8 485 22. Kazman JB, Purvis DL, Heled Y, Lisman P, Atias D, Van Arsdale S, et al. Women and  
9 486 exertional heat illness: identification of gender specific risk factors. *US Army Med Dep J*  
10 487 2015:58-66.
- 11 488 23. Dickinson JG. Heat illness in the services. *J R Army Med Corps* 1994;140(1):7-12.
- 12 489 24. Army Medical Surveillance Activity. Reported heat and cold injuries, United States  
13 490 Army, January 1997 - December 1997. *MSMR* 1998;4(1):16.
- 14 491 25. Army Medical Surveillance Activity. Heat-associated injuries, US Army 1991-2002.  
15 492 *MSMR* 2002;8(4):2-7.
- 16 493 26. Army Medical Surveillance Activity. Heat-related injuries, US Army, 2002. *MSMR*  
17 494 2003;9(4):2-4.
- 18 495 27. Army Medical Surveillance Activity. Heat-related injuries among active duty soldiers  
19 496 and Marines, 1997-1999. *MSMR* 2000;6(3):2-3.
- 20 497 28. Carter Iii R, Chevront SN, Williams JO, Kolka MA, Stephenson LA, Sawka MN, et  
21 498 al. Epidemiology of hospitalizations and deaths from heat illness in soldiers. *Med Sci Sports*  
22 499 *Exerc* 2005;37(8):1338-44.
- 23 500 29. Bedno SA, Urban N, Boivin MR, Cowan DN. Fitness, obesity and risk of heat illness  
24 501 among army trainees. *Occup Med (Lond)* 2014;64(6):461-7.
- 25 502 30. Army Medical Surveillance Activity. Heat-related injuries, U.S. Army, 2005. *MSMR*  
26 503 2006;12(5):2-4.
- 27 504 31. Army Medical Surveillance Activity. Cases of Heat and Cold Weather Injuries, United  
28 505 States Army, 1994. *MSMR* 1995;1(1):18.
- 29 506 32. Army Medical Surveillance Activity. Reported heat and cold weather injuries, United  
30 507 States Army, Jan-Dec 1995. *MSMR* 1996;2(1):16.
- 31 508 33. Army Medical Surveillance Activity. Reported heat and cold weather injuries, United  
32 509 States Army, January, 1996 - December, 1996. *MSMR* 1997;3(1):14.
- 33 510 34. Armed Forces Health Surveillance Branch. Heat-related Injuries, U.S. Armed Forces,  
34 511 2006. . *MSMR* 2007;14(2):14-5.
- 35 512 35. Armed Forces Health Surveillance Branch. Update: Heat injuries among U.S. military  
36 513 members, 2007. *MSMR* 2008;15(2):2-3.
- 37 514 36. Armed Forces Health Surveillance Branch. Update: Heat injuries among active  
38 515 component members, U.S. Armed Forces, 2008. *MSMR* 2009;16(3):8-9.
- 39 516 37. Armed Forces Health Surveillance Branch. Update: Heat injuries, active component,  
40 517 U.S. Armed Forces, 2009. *MSMR* 2010;17(3):6-8.
- 41 518 38. Armed Forces Health Surveillance Branch. Update: Heat injuries, active component,  
42 519 U.S. Armed Forces, 2010. *MSMR* 2011;18(3):6-8.
- 43 520 39. Armed Forces Health Surveillance Branch. Update: Heat injuries, active component,  
44 521 U.S. Armed Forces, 2011. *MSMR* 2012;19(3):13-5.
- 45 522 40. Armed Forces Health Surveillance Branch. Update: Heat injuries, active component,  
46 523 U.S. Armed Forces, 2012. *MSMR* 2013;20(3):17-20.
- 47 524 41. Armed Forces Health Surveillance Branch. Update: Heat injuries, active component,  
48 525 U.S. Armed Forces, 2013. *MSMR* 2014;21(3):10-3.

- 1  
2  
3 526 42. Armed Forces Health Surveillance Branch. Update: Heat injuries, active component,  
4 527 U.S. Armed Forces, 2014. *MSMR* 2015;22(3):17-20.
- 5 528 43. Armed Forces Health Surveillance Branch. Update: Heat injuries, active component,  
6 529 U.S. Army, Navy, Air Force, and Marine Corps, 2015. *MSMR* 2016;23(3):16-9.
- 7 530 44. Armed Forces Health Surveillance Branch. Update: Heat Illness, Active Component,  
8 531 U.S. Armed Forces, 2016. *MSMR* 2017;24(3):9-13.
- 9 532 45. Armed Forces Health Surveillance Branch. Update: Heat illness, active component,  
10 533 U.S. Armed Forces, 2017. *MSMR* 2018;25(4):6-12.
- 11 534 46. Wallace RF, Kriebel D, Punnett L, Wegman DH, Wenger C, Gardner JW, et al. Risk  
12 535 factors for recruit exertional heat illness by gender and training period. *Aviat Space Environ*  
13 536 *Med* 2006;77(4):415-21.
- 14 537 47. Kazman JB, Purvis DL, Heled Y, Lisman P, Atias D, Van Arsdale S, et al. Women and  
15 538 exertional heat illness: identification of gender specific risk factors. *US Army Med Dep J*  
16 539 2015:58-66.
- 17 540 48. Wang Y, Hunt K, Nazareth I, Freemantle N, Petersen I. Do men consult less than  
18 541 women? An analysis of routinely collected UK general practice data. *BMJ open*  
19 542 2013;3(8):e003320 doi:10.1136/bmjopen-2013-003320 [published Online First: 21 August  
20 543 2018]
- 21 544 49. Epstein Y, Yanovich R, Moran DS, Heled Y. Physiological employment standards IV:  
22 545 integration of women in combat units physiological and medical considerations. *Eur J Appl*  
23 546 *Physiol* 2013;113(11):2673-90.
- 24 547 50. Selkirk GA, McLellan TM. Influence of aerobic fitness and body fatness on tolerance  
25 548 to uncompensable heat stress. *J Appl Physiol* (1985) 2001;91(5):2055-63.
- 26 549 51. Cleary M. Predisposing risk factors on susceptibility to exertional heat illness: clinical  
27 550 decision-making considerations. *J Sport Rehabil* 2007;16(3):204-14.
- 28 551 52. Huang G, Gibson CA, Tran ZV, Osness WH. Controlled endurance exercise training  
29 552 and VO<sub>2</sub>max changes in older adults: a meta-analysis. *Prev Cardiol* 2005;8(4):217-25.
- 30 553 53. Woo JS, Derleth C, Stratton JR, Levy WC. The Influence of Age, Gender, and Training  
31 554 on Exercise Efficiency. *J Am Coll Cardiol* 2006;47(5):1049-57.
- 32 555 54. The Australian Army. Physical Fitness Assessment 2018. [Accessed 5 April 2019].  
33 556 Available from: [https://www.army.gov.au/army-life/army-careers/army-recruit-training-](https://www.army.gov.au/army-life/army-careers/army-recruit-training-centre-kapooka/soldier-training/physical-fitness)  
34 557 [centre-kapooka/soldier-training/physical-fitness](https://www.army.gov.au/army-life/army-careers/army-recruit-training-centre-kapooka/soldier-training/physical-fitness).
- 35 558 55. The Australian Army. The Army Physical Training Continuum: The Australian Army.;  
36 559 2018 [Accessed 5 April 2019]. Available from:  
37 560 [https://content.defencejobs.gov.au/pdf/army/Army\\_Physical\\_Continuum\\_Information.pdf](https://content.defencejobs.gov.au/pdf/army/Army_Physical_Continuum_Information.pdf).
- 38 561 56. McLellan TM. The importance of aerobic fitness in determining tolerance to  
39 562 uncompensable heat stress. *Comp Biochem Physiol Part A Mol Integr Physiol*  
40 563 2001;128(4):691-700.
- 41 564 57. Zimmerman EB, Woolf SH, Haley A. Understanding the relationship between  
42 565 education and health: a review of the evidence and an examination of community perspectives.  
43 566 2015. [Accessed 5 April 2019]. Available from:  
44 567 [http://www.ahrq.gov/professionals/education/curriculum-tools/population-](http://www.ahrq.gov/professionals/education/curriculum-tools/population-health/zimmerman.html)  
45 568 [health/zimmerman.html](http://www.ahrq.gov/professionals/education/curriculum-tools/population-health/zimmerman.html)
- 46 569 58. Gormley SE, Swain DP, High R, Spina RJ, Dowling EA, Kotipalli US, et al. Effect of  
47 570 intensity of aerobic training on VO<sub>2</sub>max. *Med Sci Sports Exerc* 2008;40(7):1336-43.

- 1  
2  
3 571 59. Moran DS, Eli-Berchoer L, Heled Y, Mendel L, Schocina M, Horowitz M. Heat  
4 572 intolerance: does gene transcription contribute? J Appl Physiol 2006;100(4):1370-6.  
5 573 60. Nelson DA, Deuster PA, Carter R, Hill OT, Wolcott VL, Kurina LM. Sickle Cell Trait,  
6 574 Rhabdomyolysis, and Mortality among U.S. Army Soldiers. N Engl J Med 2016;375(5):435-  
7 575 42.  
8  
9 576

## 11 577 **Figure legends**

12  
13 578 Figure 1: PRISMA flow chart of the study selection protocol

14  
15 579 Figure 2: Comparison of the incidence rate of heat stroke and other heat illnesses between  
16 580 women and men. This figure shows the median incidence rate for heat stroke and other heat  
17 581 injuries between 2006 and 2018. Men had significantly higher heat stroke incidence compared  
18 582 to women with a mean rank of 19.19 for men and 7.81 for women (median = 0.27, IQR = 0.11  
19 583 vs median = 0.15, IQR = 0.03; U= 10.50, P < 0.001). However, there was no significant  
20 584 difference between men and women, in the incidence of other heat injuries (median = 1.41 IQR  
21 585 = 0.37 vs median = 1.62, IQR = 0.97; mean rank = 10.65 vs 16.35, U = 47.50, P = 0.058.  
22  
23  
24  
25 586

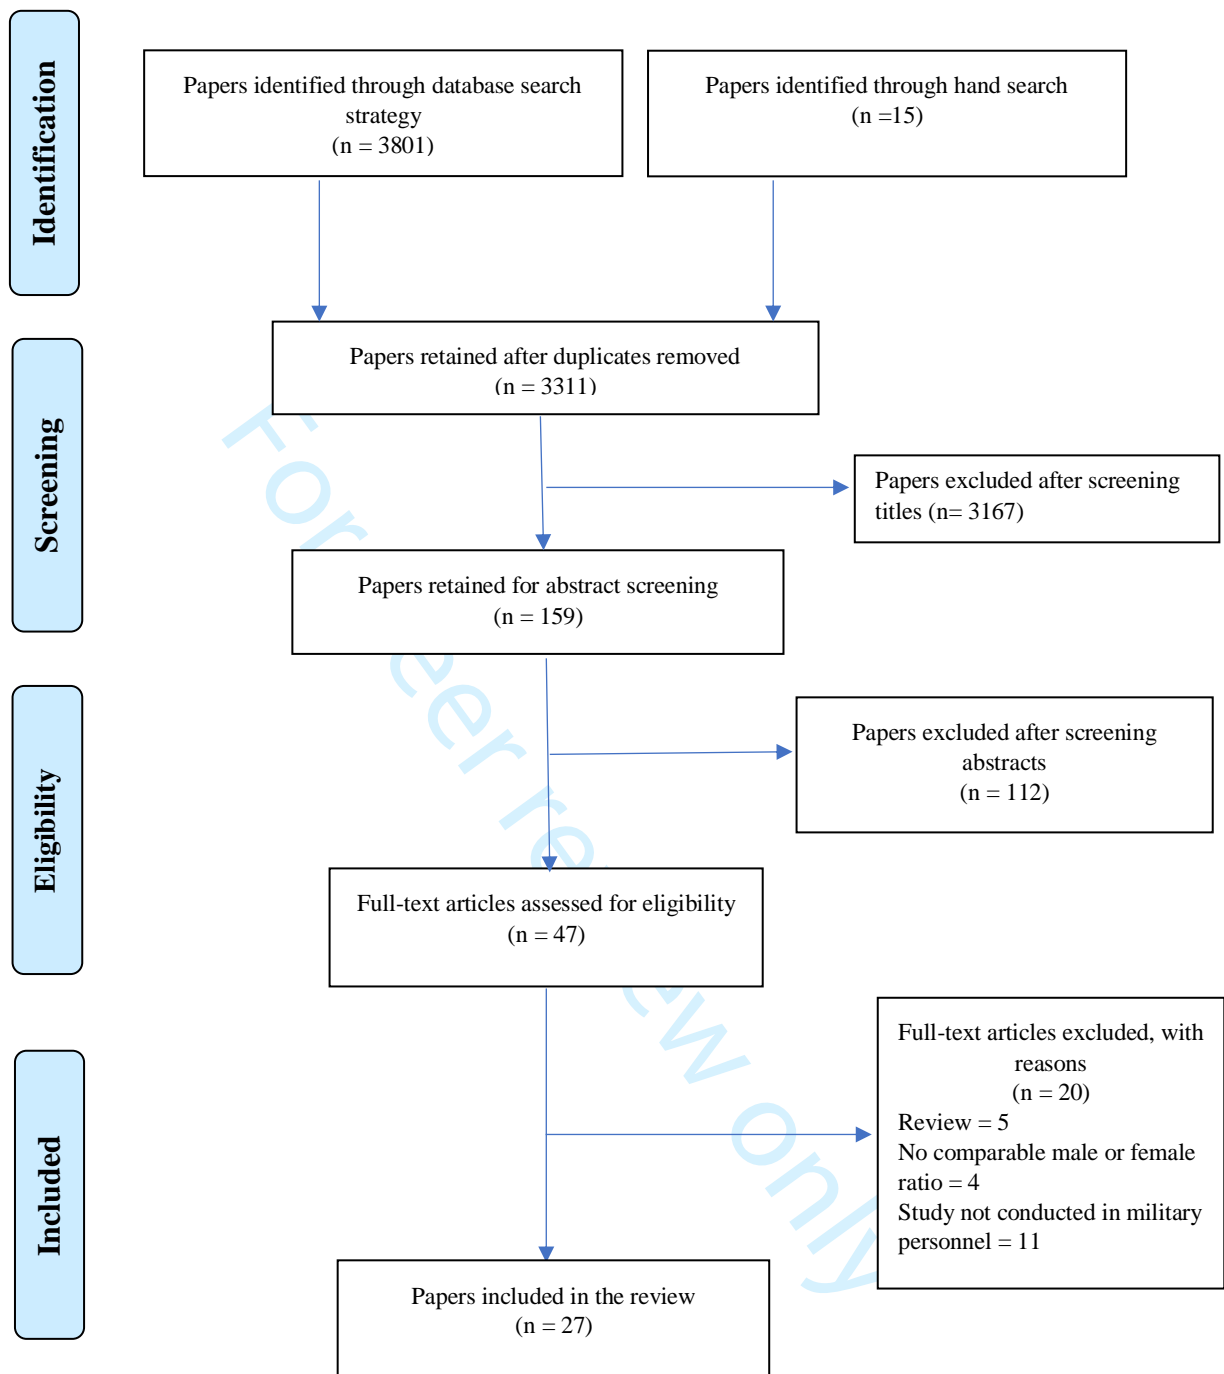

Figure 1: PRISMA flow chart of the study selection protocol

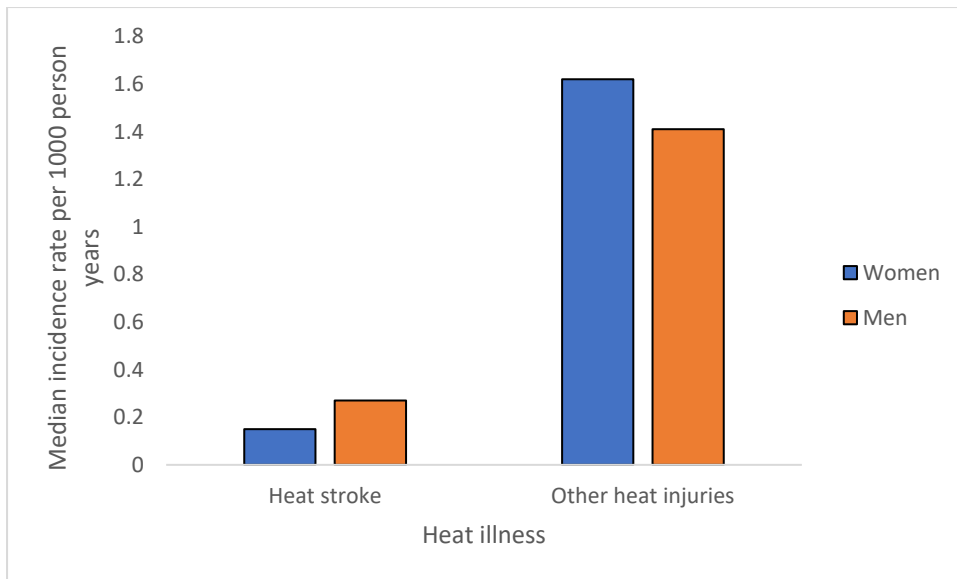

\*\*\* P < 0.001

**Figure 2**

1  
2  
3  
4  
5  
6  
7  
8  
9  
10  
11  
12  
13  
14  
15  
16  
17  
18  
19  
20  
21  
22  
23  
24  
25  
26  
27  
28  
29  
30  
31  
32  
33  
34  
35  
36  
37  
38  
39  
40  
41  
42  
43  
44  
45  
46  
47  
48  
49  
50  
51  
52  
53  
54  
55  
56  
57  
58  
59  
60

## Supplemental Table 1

| Medline search strategy |                                                                                                                                                                                                 |
|-------------------------|-------------------------------------------------------------------------------------------------------------------------------------------------------------------------------------------------|
| 1.                      | Women (MeSH)                                                                                                                                                                                    |
| 2.                      | Gender expression                                                                                                                                                                               |
| 3.                      | Gender identity (MeSH)                                                                                                                                                                          |
| 4.                      | Gender                                                                                                                                                                                          |
| 5.                      | Wom\$                                                                                                                                                                                           |
| 6.                      | Sex                                                                                                                                                                                             |
| 7.                      | Heat strok*                                                                                                                                                                                     |
| 8.                      | Heatstrok*                                                                                                                                                                                      |
| 9.                      | Heat collapse                                                                                                                                                                                   |
| 10.                     | Heat exhaustion                                                                                                                                                                                 |
| 11.                     | Heat prostration                                                                                                                                                                                |
| 12.                     | Heat cramp                                                                                                                                                                                      |
| 13.                     | Heat cramps                                                                                                                                                                                     |
| 14.                     | Heat stress disorder                                                                                                                                                                            |
| 15.                     | Heat stress disorders (MeSH)                                                                                                                                                                    |
| 16.                     | Thermal stress                                                                                                                                                                                  |
| 17.                     | Heat illness                                                                                                                                                                                    |
| 18.                     | Heat illnesses                                                                                                                                                                                  |
| 19.                     | Heat injury                                                                                                                                                                                     |
| 20.                     | Heat injuries                                                                                                                                                                                   |
| 21.                     | Heat related diseases                                                                                                                                                                           |
| 22.                     | Heat disorder                                                                                                                                                                                   |
| 23.                     | Heat disorders                                                                                                                                                                                  |
| 24.                     | Heat related disorder                                                                                                                                                                           |
| 25.                     | Heat related disorders                                                                                                                                                                          |
| 26.                     | Heat related illness                                                                                                                                                                            |
| 27.                     | Heat related illnesses                                                                                                                                                                          |
| 28.                     | Heat related injuries                                                                                                                                                                           |
| 29.                     | Heat related injury                                                                                                                                                                             |
| 30.                     | Environmental heat illness                                                                                                                                                                      |
| 31.                     | Heat stress                                                                                                                                                                                     |
| 32.                     | Heat adaptation                                                                                                                                                                                 |
| 33.                     | Heat tolerance                                                                                                                                                                                  |
| 34.                     | Heat tolerances                                                                                                                                                                                 |
| 35.                     | Heat resistance                                                                                                                                                                                 |
| 36.                     | Thermal resistance                                                                                                                                                                              |
| 37.                     | Thermoresistance                                                                                                                                                                                |
| 38.                     | Thermotolerance (MeSH)                                                                                                                                                                          |
| 39.                     | Heat endurance                                                                                                                                                                                  |
| 40.                     | 1 OR 2 OR 3 OR 4 OR 5 OR 6                                                                                                                                                                      |
| 41.                     | 7 OR 8 OR 9 OR 10 OR 11 OR 12 OR 13 OR 14 OR 15 OR 16 OR 17 OR 18 OR 19 OR 20 OR 21 OR 22 OR 23 OR 24 OR 25 OR 26 OR 27 OR 28 OR 29 OR 30 OR 31 OR 32 OR 33 OR 34 OR 35 OR 36 OR 37 OR 38 OR 39 |
| 42.                     | 40 AND 41                                                                                                                                                                                       |



**Supplemental Table 2**  
**Summary of all included studies**

| Reference, year                          | Country | Study design and duration                | Population                                                                            | Study findings <sup>§</sup>                                                                                                                                                                                                                                 |
|------------------------------------------|---------|------------------------------------------|---------------------------------------------------------------------------------------|-------------------------------------------------------------------------------------------------------------------------------------------------------------------------------------------------------------------------------------------------------------|
| Dickson. G, 1994                         | UK      | Descriptive epidemiology<br>1981-1991    | Royal Airforce, Royal Navy and Army;<br>1448 all heat injuries cases <sup>†</sup>     | <b><u>Women</u></b><br>All heat injuries: 11.43 <sup>#</sup><br><b><u>Men</u></b><br>All heat injuries: 41.87 <sup>#</sup>                                                                                                                                  |
| Army Medical Surveillance Activity, 1995 | USA     | Descriptive epidemiology;<br>1994        | US Army;<br>23 heat stroke cases<br>12 heat exhaustion cases                          | <b><u>Women</u></b><br>Heat stroke: 13%<br>Heat exhaustion: 0%<br><b><u>Men</u></b><br>Heat stroke: 87%<br>Heat exhaustion: 100%                                                                                                                            |
| Army Medical Surveillance Activity, 1996 | USA     | Descriptive epidemiology;<br>1995        | US Army;<br>81 heat stroke cases<br>39 heat exhaustion cases                          | <b><u>Women</u></b><br>Heat stroke: 17.3%<br>Heat exhaustion: 7.7%<br><b><u>Men</u></b><br>Heat stroke: 82.7%<br>Heat exhaustion: 92.3%                                                                                                                     |
| Army Medical Surveillance Activity, 1997 | USA     | Descriptive epidemiology;<br>1996        | US Army;<br>45 heat stroke cases<br>24 heat exhaustion cases                          | <b><u>Women</u></b><br>Heat stroke: 4.4%<br>Heat exhaustion: 4.2%<br><b><u>Men</u></b><br>Heat stroke: 95.6%<br>Heat exhaustion: 95.8%                                                                                                                      |
| Army Medical Surveillance Activity, 1998 | USA     | Descriptive epidemiology;<br>1997 - 1998 | US Army;<br>1433 all heat injuries cases (1997-1998) <sup>†</sup><br>1997<br><br>1998 | <b><u>Women</u></b><br>All heat injuries: 12.8 <sup>‡</sup><br><br><b><u>Men</u></b><br>All heat injuries: 8.6 <sup>‡</sup><br><br><b><u>Women</u></b><br>All heat injuries: 15.8 <sup>‡</sup><br><b><u>Men</u></b><br>All heat injuries: 12.0 <sup>‡</sup> |



1  
2  
3  
4  
5  
6  
7  
8  
9  
10  
11  
12  
13  
14  
15  
16  
17  
18  
19  
20  
21  
22  
23  
24  
25  
26  
27  
28  
29  
30  
31  
32  
33  
34  
35  
36  
37  
38  
39  
40  
41  
42  
43  
44  
45  
46

|                                          |     |                                       |                                                                                                                               |                                                                                                                                                                                                                                                                                                                                                                 |
|------------------------------------------|-----|---------------------------------------|-------------------------------------------------------------------------------------------------------------------------------|-----------------------------------------------------------------------------------------------------------------------------------------------------------------------------------------------------------------------------------------------------------------------------------------------------------------------------------------------------------------|
| Army Medical Surveillance Activity, 2000 | USA | Descriptive epidemiology; 1997 - 1999 | US Army and Marine Corps; 3386 all heat injuries cases <sup>†</sup><br><br>Army (1896 cases)<br><br>Marine Corps (1104 cases) | <b>Women</b><br>All heat injuries: 2.0 <sup>†</sup><br><b>Men</b><br>All heat injuries: 1.5 <sup>†</sup><br><b>Women</b><br>All heat injuries: 4.4 <sup>†</sup><br><b>Men</b><br>All heat injuries: 2.0 <sup>†</sup>                                                                                                                                            |
| Army Medical Surveillance Activity, 2002 | USA | Descriptive epidemiology 1990 - 1997  | US Army; 2290 all heat injuries cases <sup>†</sup>                                                                            | <b>Women</b><br>All heat injuries: 14.0%<br><br><b>Men</b><br>All heat injuries: 86.0%                                                                                                                                                                                                                                                                          |
|                                          |     | Case – control 1998 - 2001            | US Army; 5021 cases and 10,042 controls (all heat injuries) <sup>†</sup>                                                      | <b>Women</b><br>All heat injuries: 20.7%<br><br><b>Men</b><br>All heat injuries: 79.3%<br><b>Risk factors</b><br>Female: OR; 1.5 (1.4 - 1.7)<br>Age < 20 years: OR; 2.1 (1.4 - 3.1)<br>Other ethnicity*: OR; 1.2 (1.0 -1.4)<br>Combat: OR; 1.5 (1.4 - 1.6)<br>Lower level of education: OR; 2.0 (1.2 – 3.1)<br>Less than 1 year of service: OR; 2.3 (2.0 – 2.6) |
| Army Medical Surveillance Activity, 2003 | USA | Descriptive epidemiology; 2002        | US Army; 1816 all heat injuries cases <sup>†</sup>                                                                            | <b>Women</b><br>All heat injuries: 3.5 <sup>†</sup><br><br><b>Men</b><br>All heat injuries: 5.1 <sup>†</sup>                                                                                                                                                                                                                                                    |
| Carter et al, 2005                       | USA | Cross-sectional 1980 - 2002           | US Army; 5246 all heat injuries cases <sup>†</sup><br>4521 males and 725 females                                              | <b>Women</b><br>All heat injuries: 13.7%<br><b>Men</b><br>All heat injuries: 86.3%<br><b>Risk factors</b>                                                                                                                                                                                                                                                       |

|    |                                          |     |                                |                                                                                                                                                                                                                |
|----|------------------------------------------|-----|--------------------------------|----------------------------------------------------------------------------------------------------------------------------------------------------------------------------------------------------------------|
|    |                                          |     |                                | Female: IDR: 1.21 (1.09 – 1.40)<br>Infantry soldiers and gun crew men: IDR; 2.69 (1.71 – 2.89)<br>African and Hispanic ethnicity: IDR; 0.76 (0.71 – 0.82)<br>Northern state of origin: IDR; 1.69 (1.42 – 1.90) |
| 7  | Army Medical Surveillance Activity, 2006 | USA | Descriptive epidemiology; 2005 | US Armed Forces; 204 heat stroke cases<br>958 heat exhaustion cases                                                                                                                                            |
| 8  |                                          |     |                                | <b>Women</b><br>Heat stroke: 0.26†<br>Heat exhaustion: 2.89†                                                                                                                                                   |
| 9  |                                          |     |                                | <b>Men</b><br>Heat stroke: 0.48†<br>Heat exhaustion: 1.98†                                                                                                                                                     |
| 13 | Wallace et al, 2005                      | USA | Case-control 1988 - 1996       | US Army;<br>5246 cases of heat illness;<br>4521 males and 725 females                                                                                                                                          |
| 14 |                                          |     |                                | <b>Risk factors</b><br><b>Females</b><br>Run time ≥ 6.9 minutes:<br>OR; 5.30 (1.59 – 17.64)                                                                                                                    |
| 15 |                                          |     |                                | <b>Males</b><br>Run time ≥ 12.9 minutes:<br>OR; 5.61 (3.73 – 8.45)                                                                                                                                             |
| 16 |                                          |     |                                | BMI ≥ 26 kg/m <sup>2</sup> :<br>OR; 2.10 (1.59 – 2.78)                                                                                                                                                         |
| 23 | Army Medical Surveillance Activity, 2007 | USA | Descriptive epidemiology; 2006 | US Armed Forces; 259 heat stroke cases<br>1854 heat exhaustion cases                                                                                                                                           |
| 24 |                                          |     |                                | <b>Women</b><br>Heat stroke: 0.14†<br>Heat exhaustion: 1.49†                                                                                                                                                   |
| 25 |                                          |     |                                | <b>Men</b><br>Heat stroke: 0.22†<br>Heat exhaustion: 1.34†                                                                                                                                                     |
| 29 | Army Medical Surveillance Activity, 2008 | USA | Descriptive epidemiology; 2007 | US Armed Forces; 329 heat stroke cases<br>1853 heat exhaustion cases                                                                                                                                           |
| 30 |                                          |     |                                | <b>Women</b><br>Heat stroke: 0.14†<br>Heat exhaustion: 1.62†                                                                                                                                                   |
| 31 |                                          |     |                                | <b>Men</b><br>Heat stroke: 0.26†<br>Heat exhaustion: 1.34†                                                                                                                                                     |
| 35 | Army Medical Surveillance Activity, 2009 | USA | Descriptive epidemiology; 2008 | US Armed Forces; 299 heat stroke cases<br>1467 heat exhaustion cases                                                                                                                                           |
| 36 |                                          |     |                                | <b>Women</b><br>Heat stroke: 0.16†<br>Heat exhaustion: 1.35†                                                                                                                                                   |
| 37 |                                          |     |                                | <b>Men</b><br>Heat stroke: 0.22†<br>Heat exhaustion: 0.98†                                                                                                                                                     |

1  
2  
3  
4  
5  
6  
7  
8  
9  
10  
11  
12  
13  
14  
15  
16  
17  
18  
19  
20  
21  
22  
23  
24  
25  
26  
27  
28  
29  
30  
31  
32  
33  
34  
35  
36  
37  
38  
39  
40  
41  
42  
43  
44  
45  
46

|                                          |         |                                           |                                                                        |                                                                                                                                                                                                                                                                                                                                                                                                                                   |
|------------------------------------------|---------|-------------------------------------------|------------------------------------------------------------------------|-----------------------------------------------------------------------------------------------------------------------------------------------------------------------------------------------------------------------------------------------------------------------------------------------------------------------------------------------------------------------------------------------------------------------------------|
| Army Medical Surveillance Activity, 2010 | USA     | Descriptive epidemiology; 2009            | US Armed Forces; 323 heat stroke cases 2038 other heat injuries cases* | <b>Women</b><br>Heat stroke: 0.15†<br>Other heat injuries: 1.78†<br><b>Men</b><br>Heat stroke: 0.22†<br>Other heat injuries: 1.35†                                                                                                                                                                                                                                                                                                |
| Army Medical Surveillance Activity, 2011 | USA     | Descriptive epidemiology; 2010            | US Armed Forces; 311 heat stroke cases 2576 other heat injuries cases* | <b>Women</b><br>Heat stroke: 0.12†<br>Other heat injuries: 2.32†<br><b>Men</b><br>Heat stroke: 0.23†<br>Other heat injuries: 1.67†                                                                                                                                                                                                                                                                                                |
| Army Medical Surveillance Activity, 2012 | USA     | Descriptive epidemiology; 2011            | US Armed Forces; 362 heat stroke cases 2652 other heat injuries cases* | <b>Women</b><br>Heat stroke: 0.10†<br>Other heat injuries: 2.63†<br><b>Men</b><br>Heat stroke: 0.27†<br>Other heat injuries: 1.68†                                                                                                                                                                                                                                                                                                |
| Druyan et al, 2012                       | Israael | Retrospective cross-sectional 2008 – 2010 | Israeli Defence Forces; 170 males and 9 females                        | <b>Heat tolerance parameters</b><br><b>Women</b><br>Heat intolerance rate: 66.6%<br>Baseline Trec (° C): 37.18 ± 0.09<br>Endpoint Trec (° C): 38.14 ± 0.14<br>Baseline HR (bpm): 82.11 ± 4.88<br>Endpoint HR (bpm): 141.50 ± 7.84<br><b>Men</b><br>Heat intolerance rate: 25.79%<br>Baseline Trec (° C): 37.07 ± 0.02<br>Endpoint Trec (° C): 37.93 ± 0.03<br>Baseline HR (bpm): 73.94 ± 1.17<br>Endpoint HR (bpm): 126.50 ± 1.79 |
| Army Medical Surveillance Activity, 2013 | USA     | Descriptive epidemiology; 2012            | US Armed Forces; 365 heat stroke cases 2257 other heat injuries cases* | <b>Women</b><br>Heat stroke: 0.15†<br>Other heat injuries: 2.35†<br><b>Men</b><br>Heat stroke: 0.27†<br>Other heat injuries: 1.44†                                                                                                                                                                                                                                                                                                |

|                                                                                        |                                          |     |                                |                                                                              |                                                                                                                                                                                                                                                                                                                                                                                                                                                                                                                                              |
|----------------------------------------------------------------------------------------|------------------------------------------|-----|--------------------------------|------------------------------------------------------------------------------|----------------------------------------------------------------------------------------------------------------------------------------------------------------------------------------------------------------------------------------------------------------------------------------------------------------------------------------------------------------------------------------------------------------------------------------------------------------------------------------------------------------------------------------------|
| 1<br>2<br>3<br>4<br>5<br>6<br>7<br>8                                                   | Army Medical Surveillance Activity, 2014 | USA | Descriptive epidemiology; 2013 | US Armed Forces; 324 heat stroke cases<br>1701 other heat injuries cases*    | <b><u>Women</u></b><br>Heat stroke: 0.15†<br>Other heat injuries: 1.30†<br><b><u>Men</u></b><br>Heat stroke: 0.24†<br>Other heat injuries: 1.19†                                                                                                                                                                                                                                                                                                                                                                                             |
| 9<br>10<br>11<br>12                                                                    | Bedno et al, 2014                        | USA | Analytical cross-sectional     | US Armed Forces;<br>80 exertional heat illness cases                         | <b><u>Women</u></b><br>Heat illness: 0.680%<br><b><u>Men</u></b><br>Heat illness: 0.71%                                                                                                                                                                                                                                                                                                                                                                                                                                                      |
| 13<br>14<br>15<br>16<br>17<br>18                                                       | Army Medical Surveillance Activity, 2015 | USA | Descriptive epidemiology; 2014 | US Armed Forces;<br>314 heat stroke cases<br>1410 other heat injuries cases* | <b><u>Women</u></b><br>Heat stroke: 0.14†<br>Other heat injuries: 1.31†<br><b><u>Men</u></b><br>Heat stroke: 0.27†<br>Other heat injuries: 1.21†                                                                                                                                                                                                                                                                                                                                                                                             |
| 19<br>20<br>21<br>22<br>23<br>24<br>25<br>26<br>27<br>28<br>29<br>30<br>31<br>32<br>33 | Kazman et al, 2015                       | USA | Analytical cross-sectional     | Military and university community members;<br>55 males and 20 females        | <b><u>Heat tolerance parameters</u></b><br><b><u>Women</u></b><br>Heat intolerance rate: 45%<br>Baseline Trec (° C): 37.1 ± 0.4<br>Endpoint Trec (° C): 38.1 ± 0.4<br>Baseline HR (bpm): 76 ± 15.0<br>Endpoint HR (bpm): 137 ± 20.1<br><b><u>Men</u></b><br>Heat intolerance rate: 18%<br>Baseline Trec (° C): 36.9 ± 0.4<br>Endpoint Trec (° C): 38.1 ± 0.4<br>Baseline HR (bpm): 68 ± 12.1<br>Endpoint HR (bpm): 122 ± 20.2<br><b><u>Risk factors</u></b><br>Female: OR; 3.68 (1.21 – 11.24)<br>VO <sub>2max</sub> : OR; 0.9 (0.76 – 0.96) |
| 34<br>35<br>36<br>37<br>38<br>39<br>40<br>41<br>42<br>43<br>44<br>45<br>46             | Army Medical Surveillance Activity, 2016 | USA | Descriptive epidemiology; 2015 | US Armed Forces;<br>417 heat stroke cases<br>1625 other heat injuries cases* | <b><u>Women</u></b><br>Heat stroke: 0.16†<br>Other heat injuries: 1.54†<br><b><u>Men</u></b><br>Heat stroke: 0.35†<br>Other heat injuries: 1.48†                                                                                                                                                                                                                                                                                                                                                                                             |

1  
2  
3  
4  
5  
6  
7  
8  
9  
10  
11  
12  
13  
14  
15  
16  
17  
18  
19  
20  
21  
22  
23  
24  
25  
26  
27  
28  
29  
30  
31  
32  
33  
34  
35  
36  
37  
38  
39  
40  
41  
42  
43  
44  
45  
46

|                                          |     |                                  |                                                                                                                         |                                                                                                                                                                                                     |
|------------------------------------------|-----|----------------------------------|-------------------------------------------------------------------------------------------------------------------------|-----------------------------------------------------------------------------------------------------------------------------------------------------------------------------------------------------|
| Army Medical Surveillance Activity, 2017 | USA | Descriptive epidemiology; 2016   | US Armed Forces; 401 heat stroke cases<br>2135 other heat injuries cases*                                               | <b>Women</b><br>Heat stroke: 0.19†<br>Other heat injuries: 1.90†<br><b>Men</b><br>Heat stroke: 0.33†<br>Other heat injuries: 1.61†                                                                  |
| Army Medical Surveillance Activity, 2018 | USA | Descriptive epidemiology; 2017   | US Armed Forces; 464 heat stroke cases<br>1699 heat exhaustion cases                                                    | <b>Women</b><br>Heat stroke: 0.25†<br>Other heat injuries: 1.38†<br><b>Men</b><br>Heat stroke: 0.41†<br>Other heat injuries: 1.41†                                                                  |
| Singer et al, 2018                       | USA | Retrospective cohort 1992 - 2012 | SCT and non-SCT US Armed Forces<br>SCT: 214 exertional heat illness cases<br>Non-SCT: 577 exertional heat illness cases | <b>Women</b><br>Exertional heat illness: 13.89†<br><b>Men</b><br>Exertional heat illness: 14.79†<br><b>Women</b><br>Exertional heat illness: 13.14†<br><b>Men</b><br>Exertional heat illness: 7.79† |

§ Proportions and incidences reported are of the total cases reported in the articles  
# Incidence rate reported per 100,000 person-years.  
‡ Incidence rate per 100,000 person- months.  
† Incidence rate reported per 1000 person-years.  
\* Other heat injuries include “heat exhaustion” and “unspecified effects of heat”.  
‡ heat injuries include heat stroke and other heat injuries.  
SCT = Sickle cell trait  
US = United States of America; 2006 to date, heat injuries was reported in the US Armed Forces (Army, Navy, Air Force and Marine Corps).  
UK = United Kingdom; USA = United States of America

**Supplemental Table 3: Quality assessment of included studies using the quality assessment tool for studies with diverse designs (QATSDD)**

| QATSDD Criteria       | 1 | 2 | 3 | 4 | 5 | 6 | 7 | 8 | 9 | 10 | 11 | 12 | Total score | % of total score |
|-----------------------|---|---|---|---|---|---|---|---|---|----|----|----|-------------|------------------|
| Dickinson' 94[23]     | 0 | 1 | 2 | 0 | 1 | 3 | 0 | 0 | 3 | 2  | 0  | 2  | 14/36       | 38.9             |
| AMSA'95[31]           | 0 | 0 | 0 | 0 | 0 | 0 | 0 | 0 | 0 | 0  | 0  | 0  | 0/36        | 0                |
| AMSA' 96[32]          | 0 | 0 | 0 | 0 | 0 | 0 | 0 | 0 | 0 | 0  | 0  | 0  | 0/36        | 0                |
| AMSA'97[33]           | 0 | 0 | 0 | 0 | 0 | 0 | 0 | 0 | 0 | 0  | 0  | 0  | 0/36        | 0                |
| AMSA'98[24]           | 2 | 1 | 1 | 0 | 0 | 0 | 0 | 0 | 2 | 2  | 0  | 0  | 8/36        | 22.2             |
| AMSA'00[27]           | 2 | 1 | 2 | 0 | 0 | 1 | 0 | 0 | 2 | 3  | 0  | 0  | 11/36       | 30.6             |
| AMSA'02[25]           | 3 | 0 | 2 | 0 | 1 | 1 | 0 | 0 | 2 | 0  | 2  | 0  | 11/36       | 30.6             |
| AMSA'03[26]           | 2 | 1 | 1 | 0 | 1 | 1 | 0 | 0 | 2 | 2  | 0  | 0  | 10/36       | 27.8             |
| Carter et al' 05[28]  | 3 | 3 | 3 | 2 | 2 | 3 | 1 | 2 | 3 | 3  | 2  | 0  | 27/36       | 75               |
| AMSA'06[30]           | 2 | 1 | 1 | 0 | 1 | 1 | 0 | 0 | 2 | 2  | 0  | 0  | 10/36       | 27.8             |
| Wallace et al' 06[46] | 3 | 3 | 3 | 2 | 2 | 3 | 1 | 2 | 3 | 3  | 2  | 2  | 29/36       | 80.6             |
| AMSA'07[34]           | 1 | 1 | 1 | 0 | 0 | 1 | 0 | 0 | 2 | 2  | 0  | 0  | 8/36        | 22.2             |
| AMSA' 08[35]          | 1 | 1 | 1 | 0 | 0 | 1 | 0 | 0 | 2 | 2  | 0  | 0  | 8/36        | 22.2             |
| AMSA' 09[36]          | 1 | 1 | 1 | 0 | 0 | 1 | 0 | 0 | 2 | 2  | 0  | 0  | 8/36        | 22.2             |
| AMSA' 10[37]          | 1 | 1 | 2 | 0 | 0 | 1 | 0 | 0 | 2 | 2  | 0  | 2  | 11/36       | 30.6             |
| AMSA' 11[38]          | 2 | 1 | 2 | 0 | 0 | 1 | 0 | 0 | 2 | 2  | 0  | 2  | 12/36       | 33.3             |
| Druyan et al'12[15]   | 3 | 3 | 3 | 1 | 0 | 2 | 0 | 3 | 3 | 2  | 2  | 1  | 23/36       | 63.9             |
| AMSA' 12[39]          | 2 | 1 | 2 | 0 | 0 | 1 | 0 | 0 | 2 | 2  | 0  | 2  | 12/36       | 33.3             |
| AMSA' 13[40]          | 2 | 2 | 2 | 0 | 0 | 2 | 0 | 0 | 2 | 2  | 0  | 2  | 14/36       | 38.9             |
| AMSA' 14[41]          | 2 | 2 | 2 | 0 | 0 | 2 | 0 | 0 | 2 | 3  | 0  | 2  | 15/36       | 41.7             |
| AMSA' 15[42]          | 3 | 2 | 2 | 0 | 0 | 2 | 0 | 0 | 2 | 3  | 0  | 2  | 16/36       | 44.4             |
| Bedno et al, 2015[29] | 3 | 3 | 3 | 2 | 2 | 3 | 3 | 3 | 3 | 3  | 3  | 3  | 34/36       | 94.4             |
| Kazman et al' 15[47]  | 3 | 3 | 3 | 2 | 2 | 3 | 2 | 3 | 3 | 3  | 3  | 3  | 33/36       | 91.7             |
| AMSA' 16[43]          | 3 | 2 | 2 | 0 | 0 | 2 | 0 | 0 | 2 | 3  | 0  | 2  | 16/36       | 44.4             |
| AMSA' 17[44]          | 3 | 2 | 2 | 0 | 0 | 2 | 0 | 0 | 2 | 3  | 0  | 2  | 16/36       | 44.4             |
| AMSA' 18[45]          | 3 | 2 | 2 | 0 | 0 | 2 | 0 | 0 | 2 | 3  | 0  | 2  | 16/36       | 44.4             |
| Singer et al,18[21]   | 3 | 3 | 3 | 3 | 3 | 3 | 2 | 3 | 3 | 3  | 3  | 3  | 35/36       | 97.2             |

**QATSDD Criteria**

- (1) Theoretical framework; (6) Procedure for data collection (11) Good justification for analytical method selected  
(2) Aims/objectives; (7) Rationale for choice of data collection tool(s) (12) Strengths and limitations.  
(3) Description of research setting (8) Detailed recruitment data  
(4) Sample size; (9) Fit between research question and method of data collection (Quantitative only)  
(5) Representative sample of target group (10) Fit between research question and method of analysis (Quantitative only)  
QATSDD rating scale: 0=not at all; 1=very slightly; 2=moderately; 3=complete; AMSA = Army Medical Surveillance Activity

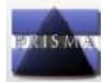

# PRISMA 2009 Checklist

| Section/topic                      | #  | Checklist item                                                                                                                                                                                                                                                                                              | Reported on page #      |
|------------------------------------|----|-------------------------------------------------------------------------------------------------------------------------------------------------------------------------------------------------------------------------------------------------------------------------------------------------------------|-------------------------|
| <b>TITLE</b>                       |    |                                                                                                                                                                                                                                                                                                             |                         |
| Title                              | 1  | Identify the report as a systematic review, meta-analysis, or both.                                                                                                                                                                                                                                         | 1                       |
| <b>ABSTRACT</b>                    |    |                                                                                                                                                                                                                                                                                                             |                         |
| Structured summary                 | 2  | Provide a structured summary including, as applicable: background; objectives; data sources; study eligibility criteria, participants, and interventions; study appraisal and synthesis methods; results; limitations; conclusions and implications of key findings; systematic review registration number. | 2                       |
| <b>INTRODUCTION</b>                |    |                                                                                                                                                                                                                                                                                                             |                         |
| Rationale                          | 3  | Describe the rationale for the review in the context of what is already known.                                                                                                                                                                                                                              | 5                       |
| Objectives                         | 4  | Provide an explicit statement of questions being addressed with reference to participants, interventions, comparisons, outcomes, and study design (PICOS).                                                                                                                                                  | 6                       |
| <b>METHODS</b>                     |    |                                                                                                                                                                                                                                                                                                             |                         |
| Protocol and registration          | 5  | Indicate if a review protocol exists, if and where it can be accessed (e.g., Web address), and, if available, provide registration information including registration number.                                                                                                                               | 6                       |
| Eligibility criteria               | 6  | Specify study characteristics (e.g., PICOS, length of follow-up) and report characteristics (e.g., years considered, language, publication status) used as criteria for eligibility, giving rationale.                                                                                                      | 6                       |
| Information sources                | 7  | Describe all information sources (e.g., databases with dates of coverage, contact with study authors to identify additional studies) in the search and date last searched.                                                                                                                                  | 6                       |
| Search                             | 8  | Present full electronic search strategy for at least one database, including any limits used, such that it could be repeated.                                                                                                                                                                               | 6, supplementary file 1 |
| Study selection                    | 9  | State the process for selecting studies (i.e., screening, eligibility, included in systematic review, and, if applicable, included in the meta-analysis).                                                                                                                                                   | Figure 1                |
| Data collection process            | 10 | Describe method of data extraction from reports (e.g., piloted forms, independently, in duplicate) and any processes for obtaining and confirming data from investigators.                                                                                                                                  | 7                       |
| Data items                         | 11 | List and define all variables for which data were sought (e.g., PICOS, funding sources) and any assumptions and simplifications made.                                                                                                                                                                       | 7                       |
| Risk of bias in individual studies | 12 | Describe methods used for assessing risk of bias of individual studies (including specification of whether this was done at the study or outcome level), and how this information is to be used in any data synthesis.                                                                                      | 7                       |
| Summary measures                   | 13 | State the principal summary measures (e.g., risk ratio, difference in means).                                                                                                                                                                                                                               | 8                       |

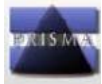

# PRISMA 2009 Checklist

|                      |    |                                                                                                                                                           |   |
|----------------------|----|-----------------------------------------------------------------------------------------------------------------------------------------------------------|---|
| Synthesis of results | 14 | Describe the methods of handling data and combining results of studies, if done, including measures of consistency (e.g., $I^2$ ) for each meta-analysis. | 8 |
|----------------------|----|-----------------------------------------------------------------------------------------------------------------------------------------------------------|---|

Page 1 of 2

| Section/topic                 | #  | Checklist item                                                                                                                                                                                           | Reported on page #               |
|-------------------------------|----|----------------------------------------------------------------------------------------------------------------------------------------------------------------------------------------------------------|----------------------------------|
| Risk of bias across studies   | 15 | Specify any assessment of risk of bias that may affect the cumulative evidence (e.g., publication bias, selective reporting within studies).                                                             | 7                                |
| Additional analyses           | 16 | Describe methods of additional analyses (e.g., sensitivity or subgroup analyses, meta-regression), if done, indicating which were pre-specified.                                                         | N/A                              |
| <b>RESULTS</b>                |    |                                                                                                                                                                                                          |                                  |
| Study selection               | 17 | Give numbers of studies screened, assessed for eligibility, and included in the review, with reasons for exclusions at each stage, ideally with a flow diagram.                                          | Figure 1                         |
| Study characteristics         | 18 | For each study, present characteristics for which data were extracted (e.g., study size, PICOS, follow-up period) and provide the citations.                                                             | 8, Supplementary file 2          |
| Risk of bias within studies   | 19 | Present data on risk of bias of each study and, if available, any outcome level assessment (see item 12).                                                                                                | 15, 16                           |
| Results of individual studies | 20 | For all outcomes considered (benefits or harms), present, for each study: (a) simple summary data for each intervention group (b) effect estimates and confidence intervals, ideally with a forest plot. | 10, 12, 14, Supplementary file 2 |
| Synthesis of results          | 21 | Present results of each meta-analysis done, including confidence intervals and measures of consistency.                                                                                                  | 9, 10, 11, 12, 13, 14            |
| Risk of bias across studies   | 22 | Present results of any assessment of risk of bias across studies (see Item 15).                                                                                                                          | 16                               |
| Additional analysis           | 23 | Give results of additional analyses, if done (e.g., sensitivity or subgroup analyses, meta-regression [see Item 16]).                                                                                    | N/A                              |
| <b>DISCUSSION</b>             |    |                                                                                                                                                                                                          |                                  |
| Summary of evidence           | 24 | Summarize the main findings including the strength of evidence for each main outcome; consider their relevance to key groups (e.g., healthcare providers, users, and policy makers).                     | 17, 18, 19                       |
| Limitations                   | 25 | Discuss limitations at study and outcome level (e.g., risk of bias), and at review-level (e.g., incomplete retrieval of identified research, reporting bias).                                            | 20, 21                           |
| Conclusions                   | 26 | Provide a general interpretation of the results in the context of other evidence, and implications for future research.                                                                                  | 21, 22                           |
| <b>FUNDING</b>                |    |                                                                                                                                                                                                          |                                  |



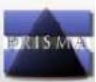

# PRISMA 2009 Checklist

1  
2  
3  
4  
5  
6  
7  
8  
9  
10  
11  
12  
13  
14  
15  
16  
17  
18  
19  
20  
21  
22  
23  
24  
25  
26  
27  
28  
29  
30  
31  
32  
33  
34  
35  
36  
37  
38  
39  
40  
41  
42  
43  
44  
45  
46  
47

|         |    |                                                                                                                                            |    |
|---------|----|--------------------------------------------------------------------------------------------------------------------------------------------|----|
| Funding | 27 | Describe sources of funding for the systematic review and other support (e.g., supply of data); role of funders for the systematic review. | 22 |
|---------|----|--------------------------------------------------------------------------------------------------------------------------------------------|----|

From: Moher D, Liberati A, Tetzlaff J, Altman DG, The PRISMA Group (2009). Preferred Reporting Items for Systematic Reviews and Meta-Analyses: The PRISMA Statement. PLoS Med 6(6): e1000097. doi:10.1371/journal.pmed1000097

For more information, visit: [www.prisma-statement.org](http://www.prisma-statement.org).

Page 2 of 2

For peer review only

# BMJ Open

## Gender makes the difference in exertional heat illness in the armed forces: A systematic review and meta-analysis

|                                 |                                                                                                                                                                                                                                                                                                                                       |
|---------------------------------|---------------------------------------------------------------------------------------------------------------------------------------------------------------------------------------------------------------------------------------------------------------------------------------------------------------------------------------|
| Journal:                        | <i>BMJ Open</i>                                                                                                                                                                                                                                                                                                                       |
| Manuscript ID                   | bmjopen-2019-031825.R1                                                                                                                                                                                                                                                                                                                |
| Article Type:                   | Original research                                                                                                                                                                                                                                                                                                                     |
| Date Submitted by the Author:   | 30-Aug-2019                                                                                                                                                                                                                                                                                                                           |
| Complete List of Authors:       | Alele, Faith; James Cook University, College of Healthcare Sciences Malau-Aduli, Bunmi; James Cook University, College of Medicine and Dentistry Malau-Aduli, Aduli; James Cook University, College of Public Health, Medical and Veterinary Sciences Crowe, Melissa; James Cook University, Division of Tropical Health and Medicine |
| <b>Primary Subject Heading</b>: | Occupational and environmental medicine                                                                                                                                                                                                                                                                                               |
| Secondary Subject Heading:      | Sports and exercise medicine                                                                                                                                                                                                                                                                                                          |
| Keywords:                       | OCCUPATIONAL & INDUSTRIAL MEDICINE, ACCIDENT & EMERGENCY MEDICINE, Heat Stroke, Armed Forces, Women                                                                                                                                                                                                                                   |
|                                 |                                                                                                                                                                                                                                                                                                                                       |

SCHOLARONE™  
Manuscripts



I, the Submitting Author has the right to grant and does grant on behalf of all authors of the Work (as defined in the below author licence), an exclusive licence and/or a non-exclusive licence for contributions from authors who are: i) UK Crown employees; ii) where BMJ has agreed a CC-BY licence shall apply, and/or iii) in accordance with the terms applicable for US Federal Government officers or employees acting as part of their official duties; on a worldwide, perpetual, irrevocable, royalty-free basis to BMJ Publishing Group Ltd ("BMJ") its licensees and where the relevant Journal is co-owned by BMJ to the co-owners of the Journal, to publish the Work in this journal and any other BMJ products and to exploit all rights, as set out in our [licence](#).

The Submitting Author accepts and understands that any supply made under these terms is made by BMJ to the Submitting Author unless you are acting as an employee on behalf of your employer or a postgraduate student of an affiliated institution which is paying any applicable article publishing charge ("APC") for Open Access articles. Where the Submitting Author wishes to make the Work available on an Open Access basis (and intends to pay the relevant APC), the terms of reuse of such Open Access shall be governed by a Creative Commons licence – details of these licences and which [Creative Commons](#) licence will apply to this Work are set out in our licence referred to above.

Other than as permitted in any relevant BMJ Author's Self Archiving Policies, I confirm this Work has not been accepted for publication elsewhere, is not being considered for publication elsewhere and does not duplicate material already published. I confirm all authors consent to publication of this Work and authorise the granting of this licence.

1  
2  
3 1 **Gender makes the difference in exertional heat illness in the armed forces:**  
4  
5  
6 2 **A systematic review and meta-analysis**  
7  
8

9 3 **Type of article:** Review  
10

11 4 **Authors**

12  
13 5 Faith O. Alele<sup>1\*</sup>

14 6 MPHTM, MBBS

15 7 [Faith.alele@my.jcu.edu.au](mailto:Faith.alele@my.jcu.edu.au)

16 8 [+61426156266](tel:+61426156266)  
17  
18 9

19 10 A/Prof Bunmi S. Malau-Aduli<sup>2</sup>

20 11 PhD, MSc, BSc (Hons)

21 12 [Bunmi.malauaduli@jcu.edu.au](mailto:Bunmi.malauaduli@jcu.edu.au)  
22  
23 13

24 14 A/Prof Aduli EO. Malau-Aduli<sup>3</sup>

25 15 PhD, MSc, BSc (Hons)

26 16 [Aduli.malauaduli@jcu.edu.au](mailto:Aduli.malauaduli@jcu.edu.au)  
27  
28 17

29 18 Dr Melissa Crowe<sup>4</sup>

30 19 PhD, BSc (Hons)

31 20 [Melissa.crowe@jcu.edu.au](mailto:Melissa.crowe@jcu.edu.au)  
32  
33 21

34  
35 22 <sup>1</sup>College of Healthcare Sciences, James Cook University, Townsville QLD 4811, Australia

36  
37 23 <sup>2</sup>College of Medicine and Dentistry, James Cook University, Townsville QLD 4814, Australia

38  
39 24 <sup>3</sup>College of Public Health, Medical and Veterinary Sciences, James Cook University,  
40 25 Townsville QLD 4811, Australia

41  
42 26 <sup>4</sup>Division of Tropical Health and Medicine, James Cook University, Townsville QLD 4811,  
43 27 Australia  
44  
45 28

46  
47 29 **\*Corresponding author:**

48  
49 30 Faith O. Alele, College of Healthcare Sciences, James Cook University, Townsville QLD 4811,  
50 31 Australia, Townsville QLD 4811, Australia

51  
52 32 Tel: [+61426156266](tel:+61426156266)

53  
54 33 Email: [faith.alele@my.jcu.edu.au](mailto:faith.alele@my.jcu.edu.au)  
55  
56 34

57  
58 35 Word count: 4723  
59  
60 36

## 37 Abstract

38 **Objectives:** The aim of this review is to describe the epidemiology of all heat related illnesses  
39 in women compared to men in the armed forces and to identify risk factors and gender  
40 differences in heat illness and heat tolerance.

41 **Design:** Systematic review and meta-analysis.

42 **Data sources and eligibility criteria:** A search of multiple databases (MEDLINE, Emcare,  
43 CINAHL, PsycINFO, Informit, and Scopus) was conducted from inception of the databases to  
44 1 April 2019 for studies investigating and comparing heat illness and heat tolerance in women  
45 and men in the armed forces.

46 **Results:** Twenty-seven (27) studies were included in the systematic review and 13 of these  
47 studies were included in the meta-analysis. Meta-analysis of the 13 studies identified a 43%  
48 decreased risk of heat stroke in women compared to men (risk ratio = 0.56, 95% CI 0.47 to  
49 0.66). The overall risk of other heat illnesses (heat exhaustion and unspecified effects of heat  
50 and light) was 26% higher in women compared to men (risk ratio = 1.26, 95% CI 1.15 to 1.38).  
51 The factors significantly associated with heat illness were gender, age, level of education,  
52 ethnicity, body mass index (BMI), positive sickle cell trait, being in service for less than 1 year,  
53 and unit of service. Although there was a higher proportion of women who were heat intolerant  
54 compared to men; this finding needs to be interpreted with caution due to the limited evidence.

55 **Conclusion:** In relation to armed forces personnel, the findings of this review suggest that men  
56 experienced a higher risk of heat stroke than women. However, women have a greater risk of  
57 other heat illnesses. Despite the limited evidence, further research is required to investigate the  
58 influence of gender differences on heat intolerance and heat illness.

59

1  
2  
3 60 **Article summary**  
4  
5

6 61 **Strengths and limitations of this study**  
7  
8

- 9 62 • This is the first known systematic review and meta-analysis investigating the impact of  
10  
11 gender on exertional heat illness and heat tolerance in the armed forces.  
12 63  
13  
14 64 • We conducted a comprehensive search and identified potential risk factors that are  
15  
16 associated with exertional heat illness.  
17 65  
18  
19 66 • Most of the included studies utilized retrospective data with an increased likelihood of  
20  
21 misclassification bias which may have underestimated or overestimated the association  
22 67  
23 between heat-related illness and risk factors.  
24 68  
25

26 69 **Trial registration** None  
27  
28

29 70 **Key words**  
30  
31

32 71 Heat stress; Heat stroke; Heat exhaustion; Heat tolerance; Women; Armed forces  
33  
34  
35  
36  
37  
38  
39  
40  
41  
42  
43  
44  
45  
46  
47  
48  
49  
50  
51  
52  
53  
54  
55  
56  
57  
58  
59  
60

## 80 Introduction

81 Heat illnesses are disorders that arise after prolonged exposure to heat/humidity and/or  
82 increased physical activity.[1] When body temperature rises, conduction, convection, radiation  
83 and evaporation mechanisms help to cool the body and maintain normothermia.[1] However,  
84 heat loss is susceptible to prevailing environmental conditions and type of clothing worn.  
85 Without adequate cooling heat illnesses may occur including exercise-associated muscle  
86 cramps (EAMC), heat syncope, heat exhaustion and heat stroke, a potentially life-threatening  
87 disorder.[1]

88 Heat stroke is a medical emergency.[2] The condition is characterized by elevated core  
89 temperature of 40°C and above, central nervous system disturbances and multi-organ damage  
90 that may result in death.[2] Heat stroke has been classified as either classic or exertional.[3]  
91 Classical heat stroke is insidious in onset and occurs in vulnerable populations such as young  
92 children, the elderly and patients with chronic diseases.[4] On the other hand, exertional heat  
93 stroke occurs more rapidly and affects apparently healthy, active people such as athletes,  
94 factory workers, construction workers, agricultural workers, firefighters and military  
95 recruits.[5] The workers in these industries often require high levels of physical exertion to  
96 perform jobs and tasks. A combination of rigorous activities and extreme exposure to heat  
97 places the workers at increased risk of heat stress and heat stroke.[6]

98 However, the ability to cope with heat stress varies between individuals.[2] Individuals who  
99 are unable to cope with heat stress may be affected by heat exhaustion or heat stroke as a result  
100 of a combination of factors including an elevation in body temperature, cardiovascular  
101 insufficiency, hypotension and fatigue [7]. The inability to withstand heat stress during  
102 exertion in hot environments is defined as heat intolerance.[2] Evidence in the published  
103 literature suggests that heat intolerance may be as a direct result of heat stroke or due to

1  
2  
3 104 predisposing inherent factors (genetics).[2] The Israeli Defence Force developed the heat  
4  
5 105 tolerance test in 1979 as an index of the ability of soldiers to cope with exertional heat.[8]  
6  
7  
8 106 Individuals who have suffered heat stroke are sent for a heat tolerance test after a minimum  
9  
10 107 recovery period of 6 to 8 weeks as part of the return to duty process.[8] Criteria used to define  
11  
12 108 heat intolerance include an elevation in rectal temperature above 38.5°C and heart rate above  
13  
14  
15 109 150 bpm or when rectal temperature or heart rate fail to stabilize during the test. The current  
16  
17 110 heat tolerance test criteria are based on previous studies by Shapiro et al.[9] which utilised only  
18  
19 111 male military participants.[8, 9] According to these studies, the heat tolerance test is a useful  
20  
21 112 tool to determine return to duty and to prevent subsequent exertional heat stroke. [8,9] Given  
22  
23  
24 113 that heat stroke may be fatal; it is essential to identify individuals who are at high risk of  
25  
26 114 exertional heat illness. [8]

27  
28  
29 115 Globally, increasing numbers of women are joining the armed forces as inclusive approaches  
30  
31 116 to recruiting are adopted and more roles for women are created.[10] Women are required to  
32  
33 117 operate in austere environments with heat illnesses becoming more frequent.[10] This has  
34  
35  
36 118 raised the question about gender differences in thermoregulation during heat stress.[10] During  
37  
38 119 prolonged heat exposure, the body's thermal inertia is determined by complex interactions  
39  
40 120 between morphological characteristics (body composition, body mass and surface area) and  
41  
42  
43 121 heat load. Evidence suggests that women differ from men in thermal responses to heat.[11]  
44  
45 122 These difference may be because women have a lower rate of whole body evaporative heat  
46  
47 123 loss, higher body fat mass, body mass ratio,[12] number of sweat glands and lower aerobic  
48  
49  
50 124 fitness.[13] In addition, hormonal variations due to menstrual cyclic patterns and the use of  
51  
52 125 contraceptive pills may all be associated with the differences in response to heat stress.[14]  
53  
54  
55 126 Although these gender differences exist, they have not been considered when conducting the  
56  
57 127 heat tolerance test (HTT) for women who have had a heat stroke.[13] Furthermore, heat illness  
58  
59 128 can impact defence operational effectiveness and may result in acute loss of manpower and



1  
2  
3 129 possible medical discharge from service.[15] A previous review of the risk of heat illness in  
4  
5 130 women compared with men focused on the general population.[16] The findings of the review  
6  
7  
8 131 suggested that men are at increased risk of heat illness compared to women.[16] However, no  
9  
10 132 systematic review has investigated gender differences among armed forces personnel in  
11  
12 133 relation to heat illness. Given that heat intolerance may predispose to or accompany heat stroke,  
13  
14  
15 134 it is important to understand the role gender plays in heat intolerance.

16  
17  
18 135 Therefore, the objective of this systematic review and meta-analysis was to provide a  
19  
20 136 comprehensive summary of the epidemiology of heat illness and heat intolerance in women  
21  
22 137 and men in the armed forces.

23  
24  
25 138 Specific aims were

26  
27  
28 139 To determine the relative risk of heat illness in women compared to men in the armed  
29  
30 140 forces and

31  
32  
33 141 To identify predisposing risk factors associated with heat illness and heat tolerance in  
34  
35 142 the armed forces

36  
37  
38 143

## 41 144 **Methods**

### 45 145 **Search Strategy**

46  
47  
48 146 This review utilised the Preferred Reporting Items for Systematic Review and Meta-analysis  
49  
50 147 (PRISMA) guidelines [17] and the MOOSE (Meta-analysis Of Observational Studies in  
51  
52 148 Epidemiology) checklist [18] to explore all literature published in English from inception of  
53  
54 149 the different databases to 1 April 2019. Databases searched included MEDLINE, CINAHL,  
55  
56 150 PsycINFO, Emcare, Informit and Scopus. A preliminary search was conducted in Medline,  
57  
58 151 Emcare and CINAHL to identify relevant key words contained in the titles, abstracts and  
59  
60

1  
2  
3 152 subject descriptors. These search terms were used to conduct the search in other databases  
4  
5 153 without subject headings. The search strategy used in Medline is presented in supplemental  
6  
7  
8 154 Table 1. No review protocol exists.  
9

### 10 11 155 **Eligibility criteria**

12  
13 156 Studies included in the review were assessed according to the following inclusion criteria: Peer-  
14  
15  
16 157 reviewed literature comparing heat illness in women to men in the armed forces or reporting  
17  
18 158 heat tolerance in women and men of the armed forces. Exclusions included literature discussing  
19  
20 159 heat illness in other occupations, or studies where data on heat illness in women could not be  
21  
22  
23 160 separated from men or studies reporting heat illness in men or literature reviews, conference  
24  
25 161 abstracts and grey literature. In addition, additional primary data sources were also identified  
26  
27 162 from the reference lists of the included studies using a hand-search technique (Figure 1).  
28  
29

### 30 31 163 **Selection of studies and data extraction**

32  
33 164 FA and BMA identified all included studies and data extraction was performed using a standard  
34  
35 165 abstraction form. Data extracted from the studies included: study location and design,  
36  
37 166 population, proportion and incidence of heat illnesses, factors associated with heat illness and  
38  
39 167 heat tolerance, and heat tolerance in men and women. All authors cross-checked the extracted  
40  
41 168 data for consistency.  
42  
43  
44

### 45 46 169 **Quality assessment**

47  
48 170 The methodological quality assessment was assessed by FA in consultation with MC using the  
49  
50 171 modified quality assessment tool for studies with diverse designs (QATSDD) critical appraisal  
51  
52 172 tool.[19] Disagreement about any article was reviewed by BMA and AMA and discussed until  
53  
54 173 consensus was reached. The QATSDD tool is a 16-item tool which assesses the quality of  
55  
56 174 diverse studies (both quantitative and qualitative).[19] The tool was modified to exclude two  
57  
58 175 items relating to qualitative studies as well as two items relating to quantitative studies that  
59  
60

1  
2  
3 176 were not applicable to the studies included in the review. The items excluded were statistical  
4  
5 177 assessment of reliability and validity of measurement tool(s) (Quantitative only), fit between  
6  
7  
8 178 stated research question and format and content of data collection tool e.g. interview schedule  
9  
10 179 (Qualitative), assessment of reliability of analytical process (Qualitative only) and evidence of  
11  
12 180 user involvement in design. Each criterion in the modified QATSDD tool was awarded a score  
13  
14  
15 181 of 0 to 3 with 0 = not at all, 1 = very slightly, 2 = moderately and 3 = complete. The scores of  
16  
17 182 each criterion were summed to assess the methodological quality of included studies with a  
18  
19 183 maximum score of 36. The criteria included were (1) theoretical framework; (2) statement of  
20  
21 184 aims/objectives; (3) description of research setting; (4) evidence of sample size; (5)  
22  
23 185 representative sample of target group of a reasonable size, (6) description of procedure for data  
24  
25 186 collection; (7) rationale for choice of data collection tool(s); (8) detailed recruitment data; (9)  
26  
27 187 fit between research question and method of data collection (Quantitative only); (10) fit  
28  
29 188 between research question and method of analysis (Quantitative only); (11) good justification  
30  
31 189 for analytical method selected; and (12) strengths and limitations. For ease of interpretation,  
32  
33 190 the scores were converted to percentages and classified as low (<50%), medium (50-80%) or  
34  
35 191 high (>80%) quality of evidence.  
36  
37  
38  
39

#### 40 192 **Patient and public involvement**

41  
42  
43 193 There was no public or patient involvement in this study.  
44  
45

#### 46 194 **Data analysis and synthesis**

47  
48  
49 195 In this review, the International Classification of Diseases ICD 9 or ICD 10 diagnosis codes  
50  
51 196 [20, 21] for the effects of heat and light were used to classify heat illnesses. All included studies  
52  
53 197 in the review utilized either the ICD 9 or ICD 10 codes to classify heat illnesses depending on  
54  
55 198 the year of publication. Heat illnesses were categorised as all heat illnesses, heat stroke and  
56  
57 199 other heat illnesses (including heat exhaustion and unspecified effects of heat and light). For  
58  
59  
60

1  
2  
3 200 this analysis, all heat illness was defined as cases where diagnosis of heat stroke (992.0, T67.0),  
4  
5 201 heat exhaustion (992.3–5, T67.3 -5), heat syncope (992.1, T67.1), heat cramps (992.2, T67.2),  
6  
7  
8 202 heat fatigue, transient (992.6, T67.6), heat oedema (992.7, T67.7), other specified heat effects  
9  
10 203 (992.8, T67.8) and unspecified effects of heat and light (992.9, T67.9) were reported. Heat  
11  
12 204 stroke was identified and defined using the ICD diagnosis codes 992.0 (ICD 9) and T67.0 (ICD  
13  
14 205 10). While other heat illnesses were defined as heat exhaustion (992.3-5, T67 3-5) and  
15  
16 206 unspecified effects of heat and light (992.9 and T67.9). Incidence rates and proportions were  
17  
18 207 extracted from the data reported in each study and used for the analysis in this review. Studies  
19  
20 208 reporting all heat illnesses and the risk factors associated with heat illnesses and heat tolerance  
21  
22 209 were not pooled due to variation in the study designs, populations, and measures reported.

23  
24  
25  
26 210 A meta-analysis was conducted to provide an overview of the risk of heat stroke and other heat  
27  
28 211 illnesses (heat exhaustion and unspecified effects of heat) in women compared to men in the  
29  
30 212 armed forces. A pooled analysis of the risk of heat stroke was conducted separately from other  
31  
32 213 heat illnesses. For other heat illnesses, a subgroup analysis was performed according to  
33  
34 214 classifications used in the included studies (1 – heat exhaustion and unspecified effects of heat  
35  
36 215 and light and 2 – heat exhaustion). The risk ratio for each study and the pooled risk ratios (RR)  
37  
38 216 with 95% CI were calculated using Review Manager 5.3.[22] The risk ratios were presented as  
39  
40 217 the ratio of the incident rates of heat illness in women to men. A random effects model was  
41  
42 218 used taking into account the heterogeneity of the included studies.  $I^2$  was used to measure the  
43  
44 219 heterogeneity (between study variations) of the included studies. Where the percentage of  
45  
46 220 variation between the included studies was greater than 50%, a sensitivity analysis was  
47  
48 221 performed.

49  
50  
51  
52 222

53  
54  
55 223

56  
57  
58 224

## 225 **Results**

### 226 **Systematic review**

227 An initial search identified 3801 papers. After removing duplicates, screening titles and  
228 abstracts, 47 papers remained for full text review with twenty-seven (27) included in the  
229 systematic review (Figure 1). Twenty-five (25) of the reviewed articles originated from the  
230 United States of America, while the other two studies were conducted in the United Kingdom  
231 and Israel respectively (Supplemental Table 2). All included studies were conducted among  
232 armed forces personnel, however, one study focused on armed force personnel with sickle cell  
233 trait (SCT),[23] while another study included university staff and armed forces personnel in  
234 the study.[24] Twenty- four (24) articles examined heat illnesses and injuries in women and  
235 men. Eight (8) of these studies described all heat related illnesses in men and women,[23, 25-  
236 31] while 16 studies included information on heat stroke and other heat injuries (including  
237 “heat exhaustion” and “unspecified effects of heat”) in relation to both genders.[32-47] Six (6)  
238 studies identified risk factors associated with heat stroke,[23, 27, 30, 31, 48, 49] and two studies  
239 compared heat tolerance in men and women.[16, 49]

### 240 **Heat illnesses in women compared to men**

241 Table 1 shows the proportions and incidences of all heat-related illness in men and women in  
242 the armed forces. Six (6) studies reported higher incidences and proportions of heat illness in  
243 men compared to women[23, 25, 27, 28, 30, 31] while two studies reported higher incidences  
244 of heat illness in women.[26, 29] Between 1995 and 1997, the mean proportion of all reported  
245 heat stroke events in women was approximately 12% compared to 88% of heat stroke events  
246 in men. Similarly, men reported a higher mean proportion of heat exhaustion (96%) compared  
247 to women (4%).[33-35] Between 2006 and 2018, the average incidence rate of heat stroke in  
248 women and men was 0.16/1000 person years and 0.29/ 1000 person years. The average  
249 incidence of other heat illnesses (including heat exhaustion and unspecified effects of heat and

1  
2  
3 250 light) was 1.84/1000 person years and 1.44/ 1000 person years for women and men  
4  
5 251 respectively.  
6  
7  
8  
9  
10  
11  
12  
13  
14  
15  
16  
17  
18  
19  
20  
21  
22  
23  
24  
25  
26  
27  
28  
29  
30  
31  
32  
33  
34  
35  
36  
37  
38  
39  
40  
41  
42  
43  
44  
45  
46  
47  
48  
49  
50  
51  
52  
53  
54  
55  
56  
57  
58  
59  
60

For peer review only

252 **Table 1: Proportion and incidence of heat related illnesses in women and men in the Armed Force**

| Reference, year                              | Country | Study design               | Study duration         | Population                                                                           | ICD codes               | All heat injuries |                               |
|----------------------------------------------|---------|----------------------------|------------------------|--------------------------------------------------------------------------------------|-------------------------|-------------------|-------------------------------|
|                                              |         |                            |                        |                                                                                      |                         | Women             | Men                           |
| Dickson. 1994[25]                            | UK      | Descriptive epidemiology   | 1981-1991 (10yrs)      | Royal Air force, Royal Navy and Army (1448 cases)                                    | ICD-9-CM: 992.0 – 992.9 | 11.43*            | 41.87*                        |
| Army Medical Surveillance Activity, 1998[26] | USA     | Descriptive epidemiology   | 1997 – 1998 (1 year)   | US Army (1433 cases) 1997                                                            | ICD-9-CM: 992.0 – 992.9 | 12.8†             | 8.6†                          |
|                                              |         |                            | 1998                   |                                                                                      |                         | 15.8†             | 12.0†                         |
| Army Medical Surveillance Activity, 2000[29] | USA     | Descriptive epidemiology   | 1997 – 1999 (2 years)  | US Army and Marine Corps (3386 cases)                                                | ICD-9-CM: 992.0 – 992.9 |                   |                               |
|                                              |         |                            |                        | Army (1896 cases)<br>Marine Corps (1104 cases)                                       |                         |                   | 2.0† 1.5†<br>4.4† 2.0†        |
| Army Medical Surveillance Activity, 2002[27] | USA     | Descriptive epidemiology   | 1990 – 1997 (7 years)  | US Army (2290 cases)                                                                 | ICD-9-CM: 992.0 – 992.9 | 14.0%§            | 86.0%§                        |
|                                              |         | Case control               | 1998 – 2001 (3 years)  | US Army (5021 cases and 10,042 controls)                                             |                         | 20.7%§            | 79.3%§                        |
| Army Medical Surveillance Activity, 2003[28] | USA     | Descriptive epidemiology   | 2002 (1 year)          | US Army (1816 cases)                                                                 | ICD-9-CM: 992.0 – 992.9 | 3.5†              | 5.1†                          |
| Carter et al, 2005[30]                       | USA     | Cross-sectional            | 1980 – 2002 (22 years) | US Army (5246 cases)                                                                 | ICD-9-CM: 992.0 – 992.9 | 13.7%§            | 86.3%§                        |
| Bedno et al, 2014[31]                        | USA     | Analytical cross-sectional | 2005 - 2006            | US Armed forces (80 exertional heat illness cases)<br>9455 men<br>1913 women         | ICD-9-CM: 992.0 – 992.9 | 0.680%            | 0.71%                         |
| Singer et al, 2018[23]                       | USA     | Retrospective cohort       | 1992 - 2012            | SCT and non-SCT US Armed forces                                                      | ICD-9-CM: 992.0 – 992.9 |                   |                               |
|                                              |         |                            |                        | SCT: 214 exertional heat illness cases<br>Non-SCT: 577 exertional heat illness cases |                         |                   | 13.89† 14.79†<br>13.14† 7.79† |

253 § Proportions and incidences reported are of the total cases reported in the articles

254 \* Incidence rate reported per 100,000 person-years; † Incidence rate per 100,000 person- months; ‡ Incidence rate reported per 1000 person-years

255 UK = United Kingdom; USA = United States of America

1  
2  
3 256 **Risk factors for heat illness and heat intolerance**  
4  
5

6 257 As shown in Table 2, five (5) studies identified the risk factors associated with heat illness,[23,  
7  
8 258 27, 30, 31, 48] while one (1) study identified the predictors of heat intolerance.[49] Of the five  
9  
10 259 (5) studies reporting the risk factors associated with heat illness, one study identified the risk  
11  
12 260 for heat illness in association with SCT status.[23] The odds of females experiencing heat  
13  
14 261 illness ranged from 1.04 to 1.5 compared to males.[23, 27, 30, 31] Other identified risk factors  
15  
16 262 for heat illness (Table 2) included younger and older age,[23, 27] lower level of education,[27]  
17  
18 263 ethnicity,[27, 30] higher body mass index (BMI),[48] being SCT positive,[23] being in service  
19  
20 264 for less than 1 year,[27] and serving in combat units as an infantry or gun crew soldier.[27, 30]  
21  
22  
23  
24 265 The factor that predicted heat intolerance was lower  $VO_{2max}$ .[49]  
25  
26  
27  
28  
29  
30  
31  
32  
33  
34  
35  
36  
37  
38  
39  
40  
41  
42  
43  
44  
45  
46  
47  
48  
49  
50  
51  
52  
53  
54  
55  
56  
57  
58  
59  
60



278 **Table 2: Risk factors associated with heat illness and tolerance**

| Reference, year                              | Country | Study design and duration                           | Study population                                                                                                        | Risk factors                          | OR or IDR (95% CI)  |
|----------------------------------------------|---------|-----------------------------------------------------|-------------------------------------------------------------------------------------------------------------------------|---------------------------------------|---------------------|
| Army Medical Surveillance Activity, 2002[27] | USA     | Case-control<br>1998 – 2001<br>(3 years)            | US Army<br>5021 cases and 10,042 controls                                                                               | Female                                | 1.5 (1.4 - 1.7)     |
|                                              |         |                                                     |                                                                                                                         | Age < 20 years                        | 2.1 (1.4 - 3.1)     |
|                                              |         |                                                     |                                                                                                                         | Other ethnicity*                      | 1.2 (1.0 - 1.4)     |
|                                              |         |                                                     |                                                                                                                         | Combat                                | 1.5 (1.4 - 1.6)     |
|                                              |         |                                                     |                                                                                                                         | Lower level of education              | 2.0 (1.2 – 3.1)     |
| Carter et al, 2005[30]                       | USA     | Cross-sectional<br>1980 – 2002<br>(22 years)        | US Army<br>5246 cases of heat illness;<br>4521 males and 725 females                                                    | Less than 1 year of service           | 2.3 (2.0 – 2.6)     |
|                                              |         |                                                     |                                                                                                                         | Female                                | 1.21 (1.09 – 1.40)  |
|                                              |         |                                                     |                                                                                                                         | Infantry soldiers and gun crew men    | 2.69 (1.71 – 2.89)  |
|                                              |         |                                                     |                                                                                                                         | African and Hispanic ethnicity        | 0.76 (0.71 – 0.82)  |
| Wallace et al, 2006[48]                      | USA     | Case-control<br>1988 – 1996<br>(8 years)            | US Marine Corps<br>Male (627 cases and 1679 controls)<br>Female (49 cases and 123 controls)                             | Northern state of origin              | 1.69 (1.42 – 1.90)  |
|                                              |         |                                                     |                                                                                                                         | BMI ≥ 26 kg/m <sup>2</sup> (males)    | 2.10 (1.59 – 2.78)  |
|                                              |         |                                                     |                                                                                                                         | Run time ≥ 12.9 minutes (males)       | 5.61 (3.73 – 8.45)  |
| Bedno et al, 2014[31]                        | USA     | Analytical cross-sectional<br>2005 - 2006           | US Armed forces<br>9455 men (67 exertional heat illness cases)<br>1913 women (13 exertional heat illness cases)         | Run time ≥ 6.9 minutes (females)      | 5.30 (1.59 – 17.64) |
|                                              |         |                                                     |                                                                                                                         | Female                                | 1.04 (0.57 – 1.89)  |
| Kazman et al, 2015[49]                       | USA     | Analytical cross-sectional<br>(Duration not stated) | Military and university community members<br>55 males and 20 females                                                    | VO <sub>2max</sub>                    | 0.9 (0.76 – 0.96)   |
| Singer et al, 2018[23] †                     | USA     | Retrospective cohort study                          | SCT and non-SCT US Armed forces<br>SCT: 214 exertional heat illness cases<br>Non-SCT: 577 exertional heat illness cases | Female                                | 1.36 (1.17 – 1.50)  |
|                                              |         |                                                     |                                                                                                                         | SCT positive                          | 1.24 (1.06 – 1.45)  |
|                                              |         |                                                     |                                                                                                                         | Age at enlistment: 30+ years          | 1.57 (1.07 – 2.33)  |
|                                              |         |                                                     |                                                                                                                         | Marines vs Army                       | 1.51 (1.15 – 2.13)  |
|                                              |         |                                                     |                                                                                                                         | Occupation: Combat vs repair/engineer | 1.57 (1.15 – 2.13)  |

279 \*non- White, non-Black, non-Hispanic; OR = Odds ratio; IDR = Incidence density ratio; BMI= Body Mass Index; CI=Confidence Interval; USA = United States of America; † The risk factors  
280 associated with EHI and SCT status

## 281 **Heat tolerance in women and men**

282 Two studies compared heat tolerance classification in males and females using the most  
283 common test, the HTT developed by the Israeli Defence Force. [13, 49] Druyan et al.  
284 investigated gender differences in Israeli Defence Force personnel who had sustained heat  
285 injury. The study reported that 67% of the women were found to be heat intolerant compared  
286 to 26% of their male counterparts.[13] In the study by Kazman et al. the study population  
287 comprised of participants from the university and military communities. The findings of the  
288 study reported that a greater proportion of women were classified as heat intolerant compared  
289 to men (45% vs 18% respectively). [49] Although the mean physiological parameters for  
290 women and men in both studies were below the test threshold (rectal temperature >38.5C and  
291 HR >150 bpm); women had higher mean baseline temperature and mean heart rate (Table 3)  
292 in both studies [13, 49]. In addition, the mean endpoint heart rates for women were higher  
293 compared to their male counterparts.[13, 49] However, the mean end point temperature varied  
294 between the two studies; one study reported a higher endpoint temperature for females  
295 compared to males [13] and the other study reported similar endpoint temperatures for males  
296 and females.[49]

297

298 **Table 3: Heat tolerance in women and men**

| Reference, year                               | Country    | Study design and duration                                 | Study population           | Parameters                                    | Women         | Men                                                 |
|-----------------------------------------------|------------|-----------------------------------------------------------|----------------------------|-----------------------------------------------|---------------|-----------------------------------------------------|
| Druyan et al, 2012[13]                        | Israel     | Retrospective cross-sectional<br>2008 – 2010<br>(2 years) | 170 males and 9<br>females | Heat intolerance rate                         | 66.67%        | 25.79%                                              |
|                                               |            |                                                           |                            | <u>Physiological measurements (mean ± SD)</u> |               |                                                     |
|                                               |            |                                                           |                            | Baseline T <sub>rec</sub> (° C)               | 37.18 ± 0.09  | 37.07 ± 0.02                                        |
|                                               |            |                                                           |                            | Endpoint T <sub>rec</sub> (° C)               | 38.14 ± 0.14  | 37.93 ± 0.03                                        |
|                                               |            |                                                           |                            | Baseline HR (bpm)                             | 82.11 ± 4.88  | 73.94 ± 1.17                                        |
|                                               |            |                                                           |                            | Endpoint HR (bpm)                             | 141.50 ± 7.84 | 126.44 ± 1.79                                       |
|                                               |            |                                                           |                            | Kazman et al, 2015[49]                        | USA           | Analytical cross-sectional<br>(duration not stated) |
| <u>Physiological measurements (mean ± SD)</u> |            |                                                           |                            |                                               |               |                                                     |
| Baseline T <sub>rec</sub> (° C)               | 37.1 ± 0.4 | 36.9 ± 0.4                                                |                            |                                               |               |                                                     |
| Endpoint T <sub>rec</sub> (° C)               | 38.1 ± 0.4 | 38.1 ± 0.4                                                |                            |                                               |               |                                                     |
| Baseline HR (bpm)                             | 76 ± 15.0  | 68 ± 12.1                                                 |                            |                                               |               |                                                     |
| Endpoint HR (bpm)                             | 137 ± 20.1 | 122 ± 20.2                                                |                            |                                               |               |                                                     |

299 HR = Heart rate; Bpm = beats per minute; T<sub>rec</sub> = Rectal temperature; USA = United States of America

### 300 **Meta-analysis findings**

301 Of the 27 studies, 13 were included in the meta-analysis. The incidence rate data were extracted  
302 from the included studies and pooled together to perform the meta-analysis (Supplemental  
303 Table 3 and Supplemental Table 4).

### 304 **Risk of heat stroke in women and men in the armed forces**

305 In the pooled analysis, the risk ratio of heat stroke in women compared to men in the armed  
306 forces was 0.56 (95% CI 0.47 to 0.66). There was no heterogeneity ( $I^2 = 0\%$ ) in the studies  
307 reporting heat stroke (Figure 2).

### 308 **Risk of other heat illnesses in women and men in the armed forces**

309 The overall pooled risk ratio of other heat illness was 1.26 (95% CI 1.15 to 1.38) in women  
310 compared to men in the armed forces (Figure 3). The women to men risk ratio of studies  
311 reporting heat exhaustion and unspecified effects of heat and light was 1.28 (95% CI 1.14, to  
312 1.45). In studies reporting only heat exhaustion, the risk of heat exhaustion in women compared  
313 to men was 1.22 (95% CI 1.06 to 1.42). The percentage of variance between the included studies  
314 due to heterogeneity ( $I^2$ ) was 53%; a sensitivity analysis was conducted where three of the  
315 included studies with the largest rates: AMSA 2006, AMSA 2012, and AMSA 2013 [36, 42,  
316 43] were excluded. The heterogeneity test was lower ( $I^2 = 7\%$ ) after excluding the studies from  
317 the pooled analysis (Supplemental Figure 1), however the effect did not change (pooled RR =  
318 1.18, 95% CI 1.09 to 1.27).

### 319 **Assessment of methodological quality**

320 The QATSDD scores ranged from 0 to 97.2% (Supplemental Table 5). Only six studies scored  
321 above 50% and included details about recruitment, data analysis, strengths and limitations of  
322 the research. The other studies had lower scores because they lacked detailed justification for

1  
2  
3 323 the analytical methods, data collection, analysis, strengths and limitations. However, results of  
4  
5 324 the methodological assessment should be interpreted with caution. Although the tool assesses  
6  
7  
8 325 methodological quality, it is more likely to be dependent on how the paper was written. In this  
9  
10 326 review, 80% of the studies included were military reports on heat-related illnesses in the Armed  
11  
12 327 forces. These reports were published in a peer-reviewed journal and were retrospective  
13  
14 328 analyses of data collected by Defence Medical Surveillance Systems. These studies may not  
15  
16  
17 329 have reported details about data collection, strengths and limitations, but they presented valid  
18  
19 330 information on heat-related illness.  
20  
21  
22  
23  
24

331

## 332 **Discussion**

25  
26  
27  
28 333 This systematic review and meta-analysis provide an overview on the available evidence on  
29  
30 334 epidemiology of heat illnesses and heat tolerance in women compared to men in the armed  
31  
32  
33 335 forces.  
34  
35

## 336 **Summary of findings**

36  
37  
38  
39 337 The findings of this systematic review suggest a higher rate of all heat illnesses (defined as cases  
40  
41 338 where a combined diagnosis of all heat illnesses was reported) in men compared to women as  
42  
43 339 evidenced by the outcomes reported in six (6) of eight (8) studies. The meta-analysis of 13  
44  
45 340 studies demonstrated that women had 44% less risk of heat stroke compared men in the armed  
46  
47  
48 341 forces. On the other hand, the overall pooled analysis revealed that women had 26% increase  
49  
50 342 in risk of other heat illnesses (heat exhaustion and unspecified heat illnesses) Risk factors found  
51  
52 343 to be associated with exertional heat illness include age, lower level of education, ethnicity,  
53  
54 344 higher BMI, positive SCT, shorter duration of service, and service unit. The reported predictor  
55  
56 345 of heat intolerance was lower  $VO_{2max}$ . However, the association between these factors and  
57  
58  
59 346 exertional heat illness and heat intolerance is weak given the small number of articles that

1  
2  
3 347 investigated the relationship. Furthermore, despite the higher proportion of heat intolerance  
4  
5 348 reported among women; this finding should be interpreted with caution given the small sample  
6  
7  
8 349 size for females in both studies and the differences in occupations of the women in the two  
9  
10 350 studies. One study included women in the armed forces with a previous history of heat stroke,  
11  
12 351 [13] while the other study recruited women from the general population as well as military  
13  
14  
15 352 members with no previous history of heat stroke. [49]

### 17 353 **Heat illnesses in women compared to men**

18  
19  
20 354 The lower risk of heat stroke in women compared to men could possibly indicate that men can  
21  
22  
23 355 tolerate working in the heat beyond the endurance limits than women.[15] Conversely, the  
24  
25 356 women may not have ignored the early warning signs of heat illness and may have sought  
26  
27 357 earlier treatment compared to men. This reinforces the presumption that women are more  
28  
29  
30 358 inclined to make use of health services and report ill health than men.[50] In addition, the  
31  
32 359 consultation rates of men were 30% lower than women, confirming the assumption that men  
33  
34 360 are less likely to consult and may present at a later stage with more severe forms of  
35  
36  
37 361 diseases.[50] Although, previously published literature have reported a higher rate of all types  
38  
39 362 of heat illnesses in men in the general population (including some armed forces personnel)  
40  
41 363 compared to women; heat stroke was not considered separately from other forms of heat  
42  
43 364 illnesses.[16]

44  
45  
46 365 However, despite the lower risk of heat stroke, women had a greater risk of other heat illnesses  
47  
48 366 (heat exhaustion and unspecified effects of heat and light) than men.[32, 36 – 47] The higher  
49  
50 367 risk of other heat illnesses in women may likely be due to differences in physiological and  
51  
52  
53 368 physical characteristics between men and women.[51] Physiological characteristics such as  
54  
55  
56 369 hormones, use of contraceptive pills and lower evaporative heat loss may make women more  
57  
58 370 susceptible to heat illness. [12, 14] Physical characteristics such as lower aerobic fitness and  
59  
60

1  
2  
3 371 greater body fat are predictors of exertional heat illness.[51] Generally, men have less body fat  
4  
5 372 and greater lean body mass compared to women. Furthermore, women have lower aerobic  
6  
7  
8 373 fitness levels and lower overall work capacity which may contribute to the increased risk of  
9  
10 374 exertional heat illness.[51]  
11  
12

### 13 375 **Risk factors for heat illness and heat intolerance**

14  
15  
16 376 The risk factors for heat illness identified in the studies include higher BMI,[48] lower age,[23,  
17  
18 377 27] lower level of education,[27] non-White, non-Black, non-Hispanic ethnic groups,[27] less  
19  
20 378 than one year of service,[27] service unit.[27, 29] and positive SCT.[23] On the other hand,  
21  
22  
23 379 lower  $VO_{2max}$ , was identified as a predictor of heat intolerance.[49] Evidence suggest that  
24  
25 380 individuals with higher BMI (indicating higher body fat) have been reported to be at increased  
26  
27 381 risk of exertional heat illness and are less heat tolerant.[52] However, individuals with a low  
28  
29 382 BMI may or may not be fit. Individuals with low aerobic fitness levels are likely to exert  
30  
31 383 themselves beyond their physical limit and are at increased risk of heat illness.[53] During  
32  
33 384 exercise, relative physiological strain is increased, peripheral blood flow decreases which in  
34  
35 385 turn hinders thermoregulation and increasing the risk of heat illness.[53]  
36  
37  
38

39  
40 386 The association between age, duration of service, occupational roles, level of education and  
41  
42 387 heat illness may be explained by the level of aerobic fitness. Age as a risk factor varied in this  
43  
44 388 review, with younger age and older age (at enlistment) considered as factors that increase the  
45  
46 389 risk of heat illness.[23, 27] Evidence suggests that aerobic fitness decreases with older age,  
47  
48 390 especially if older adults are sedentary.[54] However, aerobic fitness improves with regular  
49  
50 391 physical exercise and the age related differences between younger and older adults are  
51  
52 392 reversed.[55] The association between shorter duration in service and the increased risk of heat  
53  
54 393 illness was inconclusive given that only one study investigated and reported its findings.  
55  
56 394 However, the findings are in contrast to a previous study that reported that individuals with  
57  
58  
59  
60

1  
2  
3 395 more years of service in the army had poorer physiological characteristics (lower aerobic  
4  
5 396 capacity, lower maximum heart rate and higher percentage body fat).[56] These poorer  
6  
7  
8 397 physiological characteristics may place armed forces personnel at risk of heat illness.[52, 53]  
9  
10 398 Furthermore, occupational roles such as serving as in Marine Corps and physically demanding  
11  
12 399 jobs such as infantry, combat and gun crew had an increased risk of heat illness compared to  
13  
14 400 personnel in administrative or support jobs. This may be associated with the rigorous and  
15  
16 401 strenuous training requirements for these jobs.[31]

17  
18  
19  
20 402 Similarly, the association between lower level of education and heat illness may be due to  
21  
22 403 aerobic fitness. Research has identified educational attainment as a major predictor of health  
23  
24 404 outcomes.[57] Education provides the opportunity for individuals to learn more about their  
25  
26 405 health and to make healthy lifestyle choices. Individuals with a higher level of education are  
27  
28 406 more likely to engage in healthy behaviours such as healthy diet and regular exercise.[57]  
29  
30 407 Regular exercise is necessary to maintain and improve aerobic fitness.[58] High aerobic fitness  
31  
32 408 may reduce the risk of exertional heat illness; however, some fit individuals may be at increased  
33  
34 409 risk of heat illness because of their ethnic status. The effect of ethnicity on heat illness varied  
35  
36 410 in this review. One study reported that minor ethnic groups (non-White, non-Black, non-  
37  
38 411 Hispanic) were more susceptible to heat illness[27], while another study reported that  
39  
40 412 Caucasians had an increased risk of heat illness compared to other ethnic groups.[30] The  
41  
42 413 association between ethnicity and heat illness is not fully understood and other factors like  
43  
44 414 acclimatisation and genetic adaptation may play a role in the differences between ethnic  
45  
46 415 groups.[59]

47  
48  
49  
50  
51  
52 416 In addition, the role of genetics in heat illness was evident in the review with SCT positive  
53  
54 417 armed force members at increased risk of exertional heat illness compared to SCT negative  
55  
56 418 members.[23] SCT is an inherited blood disorder where an individual has a wild type  
57  
58 419 haemoglobin A and haemoglobin S. Individuals with the SCT are considered heterozygous for



1  
2  
3 420 the sickle cell mutation in the subunit beta gene of the haemoglobin.[60] Evidence has linked  
4  
5 421 positive SCT with exercise related adverse health outcomes such as exertional heat illness  
6  
7 422 (including exertional rhabdomyolysis, heat stroke and hyperthermia) in military personnel.[60]  
8  
9  
10 423 However, the biological pathway by which SCT is associated with heat illness is still  
11  
12 424 unknown.[23] More in depth research is needed to elucidate the role of genetics in exertional  
13  
14  
15 425 heat illness.

### 16 17 18 426 **Heat tolerance in women and men**

19  
20 427 The risk of heat illness is dependent on thermal tolerance.[2] The HTT is conducted for  
21  
22 428 members of the armed forces after a heat stroke event as part of the return to duty process.[8]  
23  
24 429 The test criteria defines heat intolerance as peak rectal temperature  $> 38.5^{\circ}\text{C}$ , peak heart rate  
25  
26 430  $> 150$  bpm, or the inability of these values to reach a plateau.[8, 9] Although in the two studies,  
27  
28 431 a higher proportion of women were classified as heat intolerant; this evidence should be  
29  
30 432 interpreted with caution given that the female populations included in each study varied with  
31  
32 433 respect to heat illness and occupations.[13, 49] However, both studies acknowledge that gender  
33  
34 434 differences in thermoregulation may account for the higher intolerance rates in women.[13, 49]  
35  
36 435 Furthermore, both studies reported using the Israeli Defence Force heat tolerance test protocol  
37  
38 436 and given that the test protocol was developed using male participants, there may be a need to  
39  
40 437 re-evaluate the criteria for women to reduce false positive results.[13, 49]

### 41 42 43 44 438 **Strengths and limitations**

45  
46  
47  
48  
49 439 To the authors' current knowledge, this is the first known systematic review and meta-analysis  
50  
51 440 investigating the impact of gender on exertional heat illness and heat tolerance in the armed  
52  
53 441 forces. In addition, we identified potential risk factors that are associated with exertional heat  
54  
55 442 illness. However, the heterogeneity in the study designs contributed to the variable  
56  
57 443 methodological quality of the included studies. Most of the articles in this review were military  
58  
59  
60

1  
2  
3 444 reports and may not be considered of high methodological quality when assessed using a formal  
4  
5 445 critical appraisal tool. In addition, most of the included studies utilized retrospective data as  
6  
7 446 the data source with an increased likelihood of incompleteness and inaccuracy.  
8  
9 447 Misclassification bias is likely to have been introduced into the studies. Three studies that  
10  
11 448 explored the risk factors associated with heat-related illness used retrospective data. [27, 30,  
12  
13 449 48] These retrospective data may have been misclassified or incomplete at the time of entry  
14  
15 450 and may have introduced misclassification bias into the studies. This type of bias may  
16  
17 451 underestimate or overestimate the association between heat-related illness and risk factors.  
18  
19 452 Although the risk factors associated with heat illness were discussed; the review provided  
20  
21 453 limited evidence of these factors, given the few numbers of studies that investigated the  
22  
23 454 association. Furthermore, we included only studies published in English language; studies  
24  
25 455 published in other languages were excluded.  
26  
27  
28  
29  
30

### 31 456 **Implication for policy and future research**

32  
33  
34 457 This systematic review and meta-analysis demonstrate that there is limited research on  
35  
36 458 exertional heat illness in women in the armed forces. Although men had a higher risk of heat  
37  
38 459 stroke; women had a higher risk of other heat illnesses. This may be a reflection that women  
39  
40 460 are more likely to report poorer health earlier than men.[50] Further research is needed to  
41  
42 461 establish if this reflects physiological or behavioural differences. In addition , more research is  
43  
44 462 needed to understand the roles of underlying factors such as menstrual cycle phase, use of  
45  
46 463 contraceptive pills and cardiovascular function in heat illness.[13, 49] Furthermore, the limited  
47  
48 464 and inconclusive evidence suggests that more women were classified as heat intolerant  
49  
50 465 compared to men using the Israeli Defence Force heat tolerance test protocol. The current  
51  
52 466 criteria may be unfair to women given that it was developed using male participants. More  
53  
54 467 research is needed to determine the gender differences in heat tolerance as well as to consider  
55  
56  
57  
58  
59  
60

1  
2  
3 468 re-evaluating the heat tolerance test protocol or the development of a new protocol that  
4  
5 469 considers gender specific factors.[13]  
6  
7

## 8 470 **Conclusion**

9  
10  
11 471 In conclusion, this review shows that men had a higher risk of heat stroke but women in the  
12  
13 472 armed forces had a greater risk of other heat illness. Despite the limited evidence, further  
14  
15 473 research is required to investigate the influence of gender differences on heat tolerance and  
16  
17 474 heat illness. Further research is needed to evaluate the heat tolerance test protocol for women.  
18  
19  
20  
21  
22 475

## 23 24 476 **Authors' contribution**

25  
26 477 All authors contributed substantially to the study concept, design, data extraction, quality assessment  
27  
28 478 and writing of the manuscript.

29 479 **Conceptualization and design:** FOA, BSMA, AEMA and MC

30 480 **Methodology:** FOA, BSMA, AEMA and MC

31 481 **Writing - Original draft:** FOA

32 482 **Writing – critical review & editing:** FOA, BSMA, AEMA and MC

33 483 All authors read and approved the manuscript for submission.

34 484 **Funding:** The first author (FA) is supported by the Australian Government International  
35  
36 485 Research Training Program Scholarship

37 486 **Competing Interests:** The authors declare that they have no competing interests.

38 487 **Patient consent for publication:** Not required

39 488 **Data sharing statement:** There are no additional or unpublished data available.

## 40 489 **References**

- 41  
42 490 1. Becker JA, Stewart LK. Heat-related illness. Am Fam Phys 2011;83(11):1325-1330.  
43 491 2. Epstein Y. Heat intolerance: Predisposing factor or residual injury? Med Sci Sports  
44 492 Exerc 1990;22(1):29-35.  
45 493 3. Grubenhoff JA, du Ford K, Roosevelt GE. Heat-related illness. Clin Pediatr Emerg Med  
46 494 2007;8(1):59-64.  
47 495 4. Mehta SR, Jaswal DS. Heat Stroke. Medical journal, Armed forces India  
48 496 2003;59(2):140-3.  
49 497 5. Xiang J, Peng B, Pisaniello D, Hansen A. Health impacts of workplace heat exposure:  
50 498 an epidemiological review. Ind Health 2014;52(2):91-101.

- 1  
2  
3 499 6. Xiang J, Hansen A, Pisaniello D, Bi P. Extreme heat and occupational heat illnesses in  
4 500 South Australia, 2001–2010. *Occup Environ Med* 2015; 72:580-586 doi:10.1136/oemed-2014-  
5 501 102706 [published Online First 18 June 2015].
- 7 502 7. Casa DJ, DeMartini JK, Bergeron MF, et al. National Athletic Trainers' Association  
8 503 Position Statement: Exertional Heat Illnesses [published correction appears in *J Athl Train*.  
9 504 2017 Apr;52(4):401]. *J Athl Train*. 2015;50(9):986–1000. doi:10.4085/1062-6050-50.9.07
- 11 505 8. Moran DS, Heled Y, Still L, Laor A, Shapiro Y. Assessment of heat tolerance for post  
12 506 exertional heat stroke individuals. *Med Sci Monit* 2004;10(6):Cr252-7.
- 13 507 9. Shapiro Y, Magazanik A, Udassin R, Ben-Baruch G, Shvartz E, Shoenfeld Y. Heat  
14 508 intolerance in former heatstroke patients. *Ann Intern Med* 1979;90(6):913-6.
- 16 509 10. Kazman JB, Heled Y, Lisman PJ, Druyan A, Deuster PA, O'Connor FG. Exertional  
17 510 Heat Illness: The Role of Heat Tolerance Testing. *Curr Sports Med Rep* 2013;12(2):101-5.
- 18 511 11. Kenney WL. A review of comparative responses of men and women to heat stress.  
19 512 *Environ Res* 1985;37(1):1-11.
- 21 513 12. Shapiro Y, Pandolf KB, Avellini BA, Pimental NA, Goldman RF. Physiological  
22 514 responses of men and women to humid and dry heat. *J Appl Physiol* 1980;49(1):1-8.
- 23 515 13. Druyan A, Makranz C, Moran D, Yanovich R, Epstein Y, Heled Y. Heat tolerance in  
24 516 women-Reconsidering the criteria. *Aviat Space Environ Med* 2012;83(1):58-60.
- 26 517 14. Tenaglia SA, McLellan TM, Klentrou PP. Influence of menstrual cycle and oral  
27 518 contraceptives on tolerance to uncompensable heat stress. *Eur J Appl Physiol Occup Physiol*  
28 519 1999;80(2):76-83.
- 29 520 15. Hunt AP, Billing DC, Patterson MJ, Caldwell JN. Heat strain during military training  
30 521 activities: The dilemma of balancing force protection and operational capability. *Temperature*  
31 522 (Austin) 2016;3(2):307-17.
- 33 523 16. Gifford RM, Todisco T, Stacey M, Fujisawa T, Allerhand M, Woods DR, et al. Risk of  
34 524 heat illness in men and women: A systematic review and meta-analysis. *Environ Res*  
35 525 2019;171:24-35.
- 37 526 17. Moher D, Liberati A, Tetzlaff J, Altman DG. Preferred reporting items for systematic  
38 527 reviews and meta-analyses: the PRISMA statement. *Annals of internal medicine*.  
39 528 2009;151(4):264-9
- 41 529 18. Stroup DF, Berlin JA, Morton SC, Olkin I, Williamson GD, Rennie D, et al.  
42 530 Meta-analysis of observational studies in epidemiology: a proposal for reporting.  
43 531 Meta-analysis Of Observational Studies in Epidemiology (MOOSE) group. *JAMA*  
44 532 2000;283(15):2008–12.
- 45 533 19. Sirriyeh R, Lawton R, Gardner P, Armitage G. Reviewing studies with diverse designs:  
46 534 the development and evaluation of a new tool. *J Eval Clin Pract* 2012;18(4):746-52.
- 48 535 20 World Health Organization. International statistical classification of diseases and  
49 536 related health problems.10th revision version for 2016. 2016 (Accessed August 20, 2019).  
50 537 Available at <https://apps.who.int/iris/handle/10665/39473>
- 52 538 21 World Health Organization. International statistical classification of diseases and  
53 539 related health problems.10th revision version for 2016. 2016 (Accessed August 20, 2019).  
54 540 Available at <https://icd.who.int/browse10/2016/en>
- 55 541 22 Cochrane Collaboration. Review manager (RevMan)[computer program].
- 57 542 23. Singer DE, Byrne C, Chen L, Shao S, Goldsmith J, Niebuhr DW. Risk of Exertional  
58 543 Heat Illnesses Associated with Sickle Cell Trait in U.S. Military. *Mil Med* 2018;183(7-8):e310-  
59 544 e7 doi:10.1093/milmed/usx085 [published Online First: 8 February 2018].

- 1
- 2
- 3 545 2. Kazman JB, Purvis DL, Heled Y, Lisman P, Atias D, Van Arsdale S, et al. Women and
- 4 546 exertional heat illness: identification of gender specific risk factors. *US Army Med Dep J*
- 5 547 2015;58-66.
- 6
- 7 548 25. Dickinson JG. Heat illness in the services. *J R Army Med Corps* 1994;140(1):7-12.
- 8 549 26. Army Medical Surveillance Activity. Reported heat and cold injuries, United States
- 9 550 Army, January 1997 - December 1997. *MSMR* 1998;4(1):16.
- 10 551 27. Army Medical Surveillance Activity. Heat-associated injuries, US Army 1991-2002.
- 11 552 *MSMR* 2002;8(4):2-7.
- 12
- 13 553 28. Army Medical Surveillance Activity. Heat-related injuries, US Army, 2002. *MSMR*
- 14 554 2003;9(4):2-4.
- 15
- 16 555 29. Army Medical Surveillance Activity. Heat-related injuries among active duty soldiers
- 17 556 and Marines, 1997-1999. *MSMR* 2000;6(3):2-3.
- 18 557 30. Carter Iii R, Chevront SN, Williams JO, Kolka MA, Stephenson LA, Sawka MN, et
- 19 558 al. Epidemiology of hospitalizations and deaths from heat illness in soldiers. *Med Sci Sports*
- 20 559 *Exerc* 2005;37(8):1338-44.
- 21
- 22 560 31. Bedno SA, Urban N, Boivin MR, Cowan DN. Fitness, obesity and risk of heat illness
- 23 561 among army trainees. *Occup Med (Lond)* 2014;64(6):461-7.
- 24 562 32. Army Medical Surveillance Activity. Heat-related injuries, U.S. Army, 2005. *MSMR*
- 25 563 2006;12(5):2-4.
- 26
- 27 564 33. Army Medical Surveillance Activity. Cases of Heat and Cold Weather Injuries, United
- 28 565 States Army, 1994. *MSMR* 1995;1(1):18.
- 29 566 33. Army Medical Surveillance Activity. Reported heat and cold weather injuries, United
- 30 567 States Army, Jan-Dec 1995. *MSMR* 1996;2(1):16.
- 31
- 32 568 35. Army Medical Surveillance Activity. Reported heat and cold weather injuries, United
- 33 569 States Army, January, 1996 - December, 1996. *MSMR* 1997;3(1):14.
- 34 570 36. Armed forces Health Surveillance Branch. Heat-related Injuries, U.S. Armed forces,
- 35 571 2006. . *MSMR* 2007;14(2):14-5.
- 36
- 37 572 37. Armed forces Health Surveillance Branch. Update: Heat injuries among U.S. military
- 38 573 members, 2007. *MSMR* 2008;15(2):2-3.
- 39 574 38. Armed forces Health Surveillance Branch. Update: Heat injuries among active
- 40 575 component members, U.S. Armed forces, 2008. *MSMR* 2009;16(3):8-9.
- 41
- 42 576 39. Armed forces Health Surveillance Branch. Update: Heat injuries, active component,
- 43 577 U.S. Armed forces, 2009. *MSMR* 2010;17(3):6-8.
- 44 578 40. Armed forces Health Surveillance Branch. Update: Heat injuries, active component,
- 45 579 U.S. Armed forces, 2010. *MSMR* 2011;18(3):6-8.
- 46
- 47 580 41. Armed forces Health Surveillance Branch. Update: Heat injuries, active component,
- 48 581 U.S. Armed forces, 2011. *MSMR* 2012;19(3):13-5.
- 49 582 42. Armed forces Health Surveillance Branch. Update: Heat injuries, active component,
- 50 583 U.S. Armed forces, 2012. *MSMR* 2013;20(3):17-20.
- 51
- 52 584 43. Armed forces Health Surveillance Branch. Update: Heat injuries, active component,
- 53 585 U.S. Armed forces, 2013. *MSMR* 2014;21(3):10-3.
- 54 586 44. Armed forces Health Surveillance Branch. Update: Heat injuries, active component,
- 55 587 U.S. Armed forces, 2014. *MSMR* 2015;22(3):17-20.
- 56
- 57 588 45. Armed forces Health Surveillance Branch. Update: Heat injuries, active component,
- 58 589 U.S. Army, Navy, Air Force, and Marine Corps, 2015. *MSMR* 2016;23(3):16-9.
- 59
- 60



- 1  
2  
3 590 46. Armed forces Health Surveillance Branch. Update: Heat Illness, Active Component,  
4 591 U.S. Armed forces, 2016. *MSMR* 2017;24(3):9-13.
- 5 592 47. Armed forces Health Surveillance Branch. Update: Heat illness, active component,  
6 593 U.S. Armed forces, 2017. *MSMR* 2018;25(4):6-12.
- 7 594 48. Wallace RF, Kriebel D, Punnett L, Wegman DH, Wenger C, Gardner JW, et al. Risk  
8 595 factors for recruit exertional heat illness by gender and training period. *Aviat Space Environ*  
9 596 *Med* 2006;77(4):415-21.
- 10 597 49. Kazman JB, Purvis DL, Heled Y, Lisman P, Atias D, Van Arsdale S, et al. Women and  
11 598 exertional heat illness: identification of gender specific risk factors. *US Army Med Dep J*  
12 599 2015:58-66.
- 13 600 50. Wang Y, Hunt K, Nazareth I, Freemantle N, Petersen I. Do men consult less than  
14 601 women? An analysis of routinely collected UK general practice data. *BMJ open*  
15 602 2013;3(8):e003320 doi:10.1136/bmjopen-2013-003320 [published Online First: 21 August  
16 603 2018]
- 17 604 51. Epstein Y, Yanovich R, Moran DS, Heled Y. Physiological employment standards IV:  
18 605 integration of women in combat units physiological and medical considerations. *Eur J Appl*  
19 606 *Physiol* 2013;113(11):2673-90.
- 20 607 52. Selkirk GA, McLellan TM. Influence of aerobic fitness and body fatness on tolerance  
21 608 to uncompensable heat stress. *J Appl Physiol* 2001;91(5):2055-63.
- 22 609 53. Cleary M. Predisposing risk factors on susceptibility to exertional heat illness: clinical  
23 610 decision-making considerations. *J Sport Rehabil* 2007;16(3):204-14.
- 24 611 54. Huang G, Gibson CA, Tran ZV, Osness WH. Controlled endurance exercise training  
25 612 and VO<sub>2</sub>max changes in older adults: a meta-analysis. *Prev Cardiol* 2005;8(4):217-25.
- 26 613 55. Woo JS, Derleth C, Stratton JR, Levy WC. The Influence of Age, Gender, and Training  
27 614 on Exercise Efficiency. *J Am Coll Cardiol* 2006;47(5):1049-57.
- 28 615 56. Abt JP, Perlsweig K, Nagai T, Sell TC, Wirt MD, Lephart SM. Effects of Age and  
29 616 Military Service on Strength and Physiological Characteristics of US Army Soldiers. *Military*  
30 617 *medicine*. 2016 Feb 1;181(2):173-9.
- 31 618 57. Zimmerman EB, Woolf SH, Haley A. Understanding the relationship between  
32 619 education and health: a review of the evidence and an examination of community perspectives.  
33 620 2015. [Accessed 5 April 2019]. Available from:  
34 621 [http://www.ahrq.gov/professionals/education/curriculum-tools/population-](http://www.ahrq.gov/professionals/education/curriculum-tools/population-health/zimmerman.html)  
35 622 [health/zimmerman.html](http://www.ahrq.gov/professionals/education/curriculum-tools/population-health/zimmerman.html)
- 36 623 58. Gormley SE, Swain DP, High R, Spina RJ, Dowling EA, Kotipalli US, et al. Effect of  
37 624 intensity of aerobic training on VO<sub>2</sub>max. *Med Sci Sports Exerc* 2008;40(7):1336-43.
- 38 625 59. Hansen A, Bi L, Saniotis A, Nitschke M. Vulnerability to extreme heat and climate  
39 626 change: is ethnicity a factor? *Glob Health Action*. 2013;6:21364. doi:10.3402/gha.v6i0.21364  
40 627 [published Online First: 29 July 2013].
- 41 628 60. Nelson DA, Deuster PA, Carter R, Hill OT, Wolcott VL, Kurina LM. Sick Cell Trait,  
42 629 Rhabdomyolysis, and Mortality among U.S. Army Soldiers. *N Engl J Med* 2016;375(5):435-  
43 630 42.
- 44 631

## 632 **Figure legends**

633 Figure 1: PRISMA flow chart of the study selection protocol

1  
2  
3 634 Figure 2: Forest plot of studies investigating the risk of heat stroke in women compared to men  
4 635 in the armed forces. Incidence data were extracted from tables provided in the original articles.  
5  
6 636 M-H = Mantel-Haenszel; CI = confidence interval.

7  
8 637 Figure 3: Forest plot of studies investigating the risk of heat exhaustion and unspecified effect  
9 638 of heat and light (1.1.1) and heat exhaustion (1.1.2) in women compared to men in the armed  
10 639 forces. Incidence data were extracted from tables provided in the original articles. M-H =  
11 640 Mantel-Haenszel; CI = confidence interval.

12  
13 641

14  
15 642

16  
17 643

18  
19  
20  
21  
22  
23  
24  
25  
26  
27  
28  
29  
30  
31  
32  
33  
34  
35  
36  
37  
38  
39  
40  
41  
42  
43  
44  
45  
46  
47  
48  
49  
50  
51  
52  
53  
54  
55  
56  
57  
58  
59  
60

For peer review only

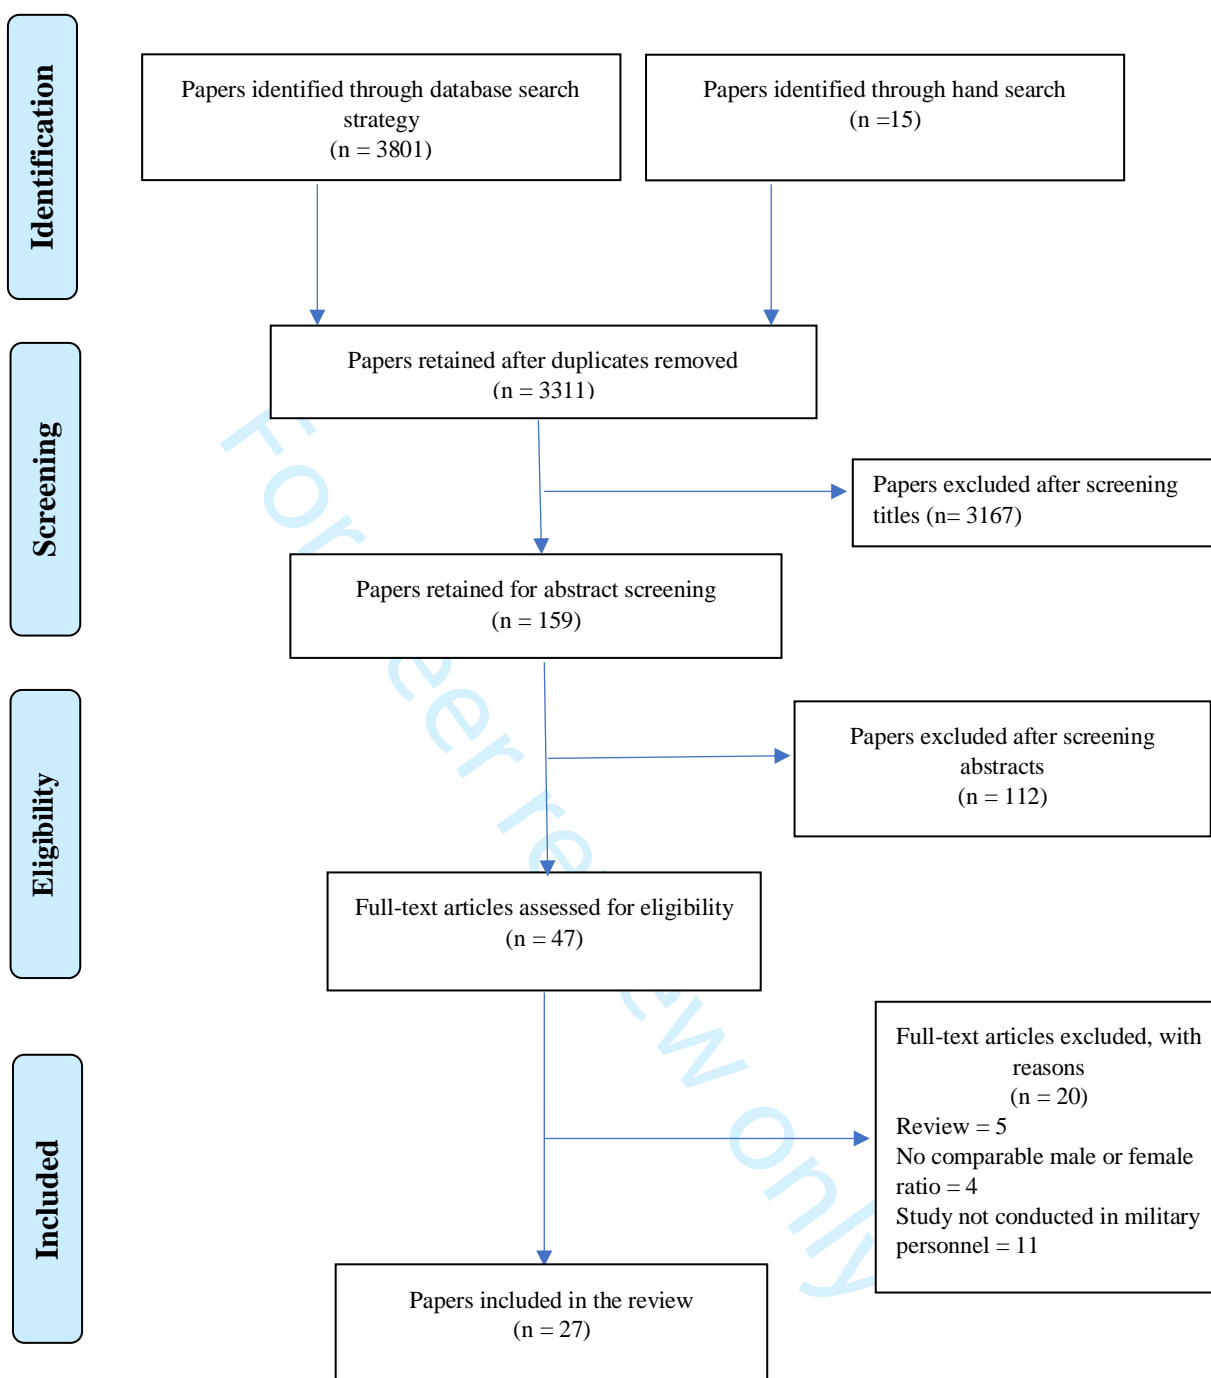

Figure 1: PRISMA flow chart of the study selection protocol



1  
2  
3  
4  
5  
6  
7  
8  
9  
10  
11  
12  
13  
14  
15  
16  
17  
18  
19  
20  
21  
22  
23  
24  
25  
26  
27  
28  
29  
30  
31  
32  
33  
34  
35  
36  
37  
38  
39  
40  
41  
42  
43  
44  
45  
46  
47  
48  
49  
50  
51  
52  
53  
54  
55  
56  
57  
58  
59  
60

For peer review only

| Study or Subgroup     | Women (rate/100000) |                | Men (rate/100000) |                | Weight        | Risk Ratio               |      | Risk Ratio          |  |
|-----------------------|---------------------|----------------|-------------------|----------------|---------------|--------------------------|------|---------------------|--|
|                       | Events              | Total          | Events            | Total          |               | M-H, Random, 95% CI      | Year | M-H, Random, 95% CI |  |
| AMSA 2006             | 26                  | 100000         | 48                | 100000         | 12.5%         | 0.54 [0.34, 0.87]        | 2006 |                     |  |
| AMSA 2007             | 14                  | 100000         | 22                | 100000         | 6.3%          | 0.64 [0.33, 1.24]        | 2007 |                     |  |
| AMSA 2008             | 14                  | 100000         | 26                | 100000         | 6.7%          | 0.54 [0.28, 1.03]        | 2008 | ←                   |  |
| AMSA 2009             | 16                  | 100000         | 22                | 100000         | 6.9%          | 0.73 [0.38, 1.38]        | 2009 |                     |  |
| AMSA 2010             | 15                  | 100000         | 24                | 100000         | 6.8%          | 0.63 [0.33, 1.19]        | 2010 |                     |  |
| AMSA 2011             | 12                  | 100000         | 23                | 100000         | 5.8%          | 0.52 [0.26, 1.05]        | 2011 | ←                   |  |
| AMSA 2012             | 10                  | 100000         | 27                | 100000         | 5.4%          | 0.37 [0.18, 0.77]        | 2012 | ←                   |  |
| AMSA 2013             | 15                  | 100000         | 27                | 100000         | 7.2%          | 0.56 [0.30, 1.04]        | 2013 | ←                   |  |
| AMSA 2014             | 15                  | 100000         | 24                | 100000         | 6.8%          | 0.63 [0.33, 1.19]        | 2014 |                     |  |
| AMSA 2015             | 14                  | 100000         | 27                | 100000         | 6.8%          | 0.52 [0.27, 0.99]        | 2015 | ←                   |  |
| AMSA 2016             | 16                  | 100000         | 35                | 100000         | 8.1%          | 0.46 [0.25, 0.83]        | 2016 | ←                   |  |
| AMSA 2017             | 19                  | 100000         | 33                | 100000         | 8.9%          | 0.58 [0.33, 1.01]        | 2017 |                     |  |
| AMSA 2018             | 25                  | 100000         | 41                | 100000         | 11.5%         | 0.61 [0.37, 1.00]        | 2018 |                     |  |
| <b>Total (95% CI)</b> |                     | <b>1300000</b> |                   | <b>1300000</b> | <b>100.0%</b> | <b>0.56 [0.47, 0.66]</b> |      |                     |  |
| Total events          | 211                 |                | 379               |                |               |                          |      |                     |  |

Heterogeneity: Tau<sup>2</sup> = 0.00; Chi<sup>2</sup> = 2.95, df = 12 (P = 1.00); I<sup>2</sup> = 0%  
 Test for overall effect: Z = 6.76 (P < 0.00001)

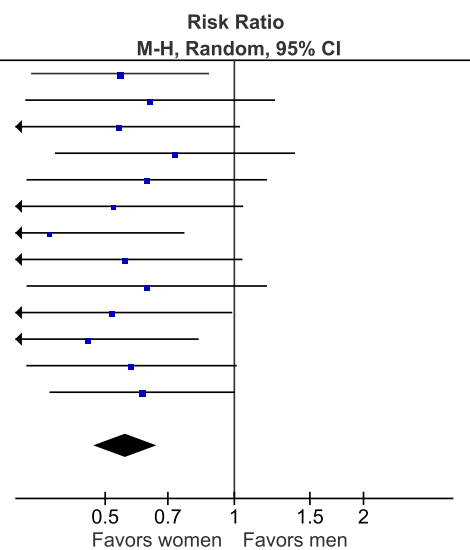

1  
2  
3  
4  
5  
6  
7  
8  
9  
10  
11  
12  
13  
14  
15  
16  
17  
18  
19  
20  
21  
22  
23  
24  
25  
26  
27  
28  
29  
30  
31  
32  
33  
34  
35  
36  
37  
38  
39  
40  
41  
42  
43  
44  
45  
46  
47  
48  
49  
50  
51  
52  
53  
54  
55  
56  
57  
58  
59  
60

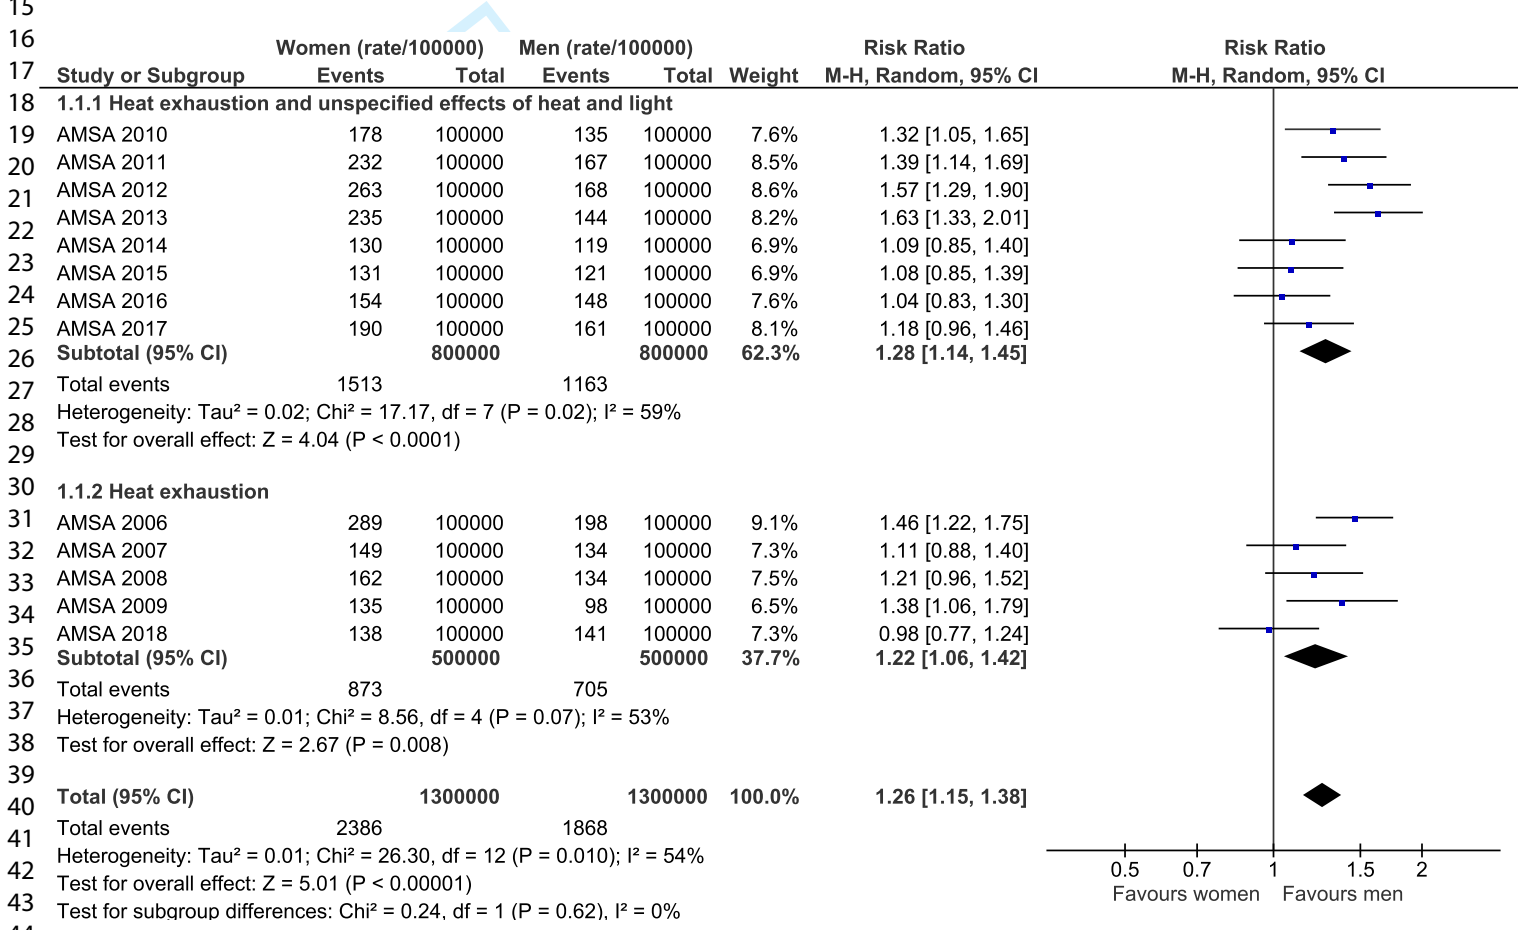

1  
2  
3  
4  
5  
6  
7  
8  
9  
10  
11  
12  
13  
14  
15  
16  
17  
18  
19  
20  
21  
22  
23  
24  
25  
26  
27  
28  
29  
30  
31  
32  
33  
34  
35  
36  
37  
38  
39  
40  
41  
42  
43  
44  
45  
46  
47  
48  
49  
50  
51  
52  
53  
54  
55  
56  
57  
58  
59  
60

## Supplemental Table 1

| Medline search strategy |                                                                                                                                                                                                 |
|-------------------------|-------------------------------------------------------------------------------------------------------------------------------------------------------------------------------------------------|
| 1.                      | Women (MeSH)                                                                                                                                                                                    |
| 2.                      | Gender expression                                                                                                                                                                               |
| 3.                      | Gender identity (MeSH)                                                                                                                                                                          |
| 4.                      | Gender                                                                                                                                                                                          |
| 5.                      | Wom\$                                                                                                                                                                                           |
| 6.                      | Sex                                                                                                                                                                                             |
| 7.                      | Heat strok*                                                                                                                                                                                     |
| 8.                      | Heatstrok*                                                                                                                                                                                      |
| 9.                      | Heat collapse                                                                                                                                                                                   |
| 10.                     | Heat exhaustion                                                                                                                                                                                 |
| 11.                     | Heat prostration                                                                                                                                                                                |
| 12.                     | Heat cramp                                                                                                                                                                                      |
| 13.                     | Heat cramps                                                                                                                                                                                     |
| 14.                     | Heat stress disorder                                                                                                                                                                            |
| 15.                     | Heat stress disorders (MeSH)                                                                                                                                                                    |
| 16.                     | Thermal stress                                                                                                                                                                                  |
| 17.                     | Heat illness                                                                                                                                                                                    |
| 18.                     | Heat illnesses                                                                                                                                                                                  |
| 19.                     | Heat injury                                                                                                                                                                                     |
| 20.                     | Heat injuries                                                                                                                                                                                   |
| 21.                     | Heat related diseases                                                                                                                                                                           |
| 22.                     | Heat disorder                                                                                                                                                                                   |
| 23.                     | Heat disorders                                                                                                                                                                                  |
| 24.                     | Heat related disorder                                                                                                                                                                           |
| 25.                     | Heat related disorders                                                                                                                                                                          |
| 26.                     | Heat related illness                                                                                                                                                                            |
| 27.                     | Heat related illnesses                                                                                                                                                                          |
| 28.                     | Heat related injuries                                                                                                                                                                           |
| 29.                     | Heat related injury                                                                                                                                                                             |
| 30.                     | Environmental heat illness                                                                                                                                                                      |
| 31.                     | Heat stress                                                                                                                                                                                     |
| 32.                     | Heat adaptation                                                                                                                                                                                 |
| 33.                     | Heat tolerance                                                                                                                                                                                  |
| 34.                     | Heat tolerances                                                                                                                                                                                 |
| 35.                     | Heat resistance                                                                                                                                                                                 |
| 36.                     | Thermal resistance                                                                                                                                                                              |
| 37.                     | Thermoresistance                                                                                                                                                                                |
| 38.                     | Thermotolerance (MeSH)                                                                                                                                                                          |
| 39.                     | Heat endurance                                                                                                                                                                                  |
| 40.                     | 1 OR 2 OR 3 OR 4 OR 5 OR 6                                                                                                                                                                      |
| 41.                     | 7 OR 8 OR 9 OR 10 OR 11 OR 12 OR 13 OR 14 OR 15 OR 16 OR 17 OR 18 OR 19 OR 20 OR 21 OR 22 OR 23 OR 24 OR 25 OR 26 OR 27 OR 28 OR 29 OR 30 OR 31 OR 32 OR 33 OR 34 OR 35 OR 36 OR 37 OR 38 OR 39 |
| 42.                     | 40 AND 41                                                                                                                                                                                       |

**Supplemental Table 2**  
**Summary of all included studies**

| Reference, year                          | Country | Study design and duration                | Population                                                                            | Study findings <sup>§</sup>                                                                                                                                                                                                     |
|------------------------------------------|---------|------------------------------------------|---------------------------------------------------------------------------------------|---------------------------------------------------------------------------------------------------------------------------------------------------------------------------------------------------------------------------------|
| Dickson. G, 1994                         | UK      | Descriptive epidemiology<br>1981-1991    | Royal Airforce, Royal Navy and Army;<br>1448 all heat injuries cases <sup>†</sup>     | <b>Women</b><br>All heat injuries: 11.43 <sup>#</sup><br><b>Men</b><br>All heat injuries: 41.87 <sup>#</sup>                                                                                                                    |
| Army Medical Surveillance Activity, 1995 | USA     | Descriptive epidemiology;<br>1994        | US Army;<br>23 heat stroke cases<br>12 heat exhaustion cases                          | <b>Women</b><br>Heat stroke: 13%<br>Heat exhaustion: 0%<br><b>Men</b><br>Heat stroke: 87%<br>Heat exhaustion: 100%                                                                                                              |
| Army Medical Surveillance Activity, 1996 | USA     | Descriptive epidemiology;<br>1995        | US Army;<br>81 heat stroke cases<br>39 heat exhaustion cases                          | <b>Women</b><br>Heat stroke: 17.3%<br>Heat exhaustion: 7.7%<br><b>Men</b><br>Heat stroke: 82.7%<br>Heat exhaustion: 92.3%                                                                                                       |
| Army Medical Surveillance Activity, 1997 | USA     | Descriptive epidemiology;<br>1996        | US Army;<br>45 heat stroke cases<br>24 heat exhaustion cases                          | <b>Women</b><br>Heat stroke: 4.4%<br>Heat exhaustion: 4.2%<br><b>Men</b><br>Heat stroke: 95.6%<br>Heat exhaustion: 95.8%                                                                                                        |
| Army Medical Surveillance Activity, 1998 | USA     | Descriptive epidemiology;<br>1997 - 1998 | US Army;<br>1433 all heat injuries cases (1997-1998) <sup>†</sup><br>1997<br><br>1998 | <b>Women</b><br>All heat injuries: 12.8 <sup>‡</sup><br><br><b>Men</b><br>All heat injuries: 8.6 <sup>‡</sup><br><br><b>Women</b><br>All heat injuries: 15.8 <sup>‡</sup><br><b>Men</b><br>All heat injuries: 12.0 <sup>‡</sup> |

1  
2  
3  
4  
5  
6  
7  
8  
9  
10  
11  
12  
13  
14  
15  
16  
17  
18  
19  
20  
21  
22  
23  
24  
25  
26  
27  
28  
29  
30  
31  
32  
33  
34  
35  
36  
37  
38  
39  
40  
41  
42  
43  
44  
45  
46

|                                          |     |                                       |                                                                                                                               |                                                                                                                                                                                                                                                                                                                                                                 |
|------------------------------------------|-----|---------------------------------------|-------------------------------------------------------------------------------------------------------------------------------|-----------------------------------------------------------------------------------------------------------------------------------------------------------------------------------------------------------------------------------------------------------------------------------------------------------------------------------------------------------------|
| Army Medical Surveillance Activity, 2000 | USA | Descriptive epidemiology; 1997 - 1999 | US Army and Marine Corps; 3386 all heat injuries cases <sup>†</sup><br><br>Army (1896 cases)<br><br>Marine Corps (1104 cases) | <b>Women</b><br>All heat injuries: 2.0 <sup>†</sup><br><b>Men</b><br>All heat injuries: 1.5 <sup>†</sup><br><b>Women</b><br>All heat injuries: 4.4 <sup>†</sup><br><b>Men</b><br>All heat injuries: 2.0 <sup>†</sup>                                                                                                                                            |
| Army Medical Surveillance Activity, 2002 | USA | Descriptive epidemiology 1990 - 1997  | US Army; 2290 all heat injuries cases <sup>†</sup>                                                                            | <b>Women</b><br>All heat injuries: 14.0%<br><br><b>Men</b><br>All heat injuries: 86.0%                                                                                                                                                                                                                                                                          |
|                                          |     | Case – control 1998 - 2001            | US Army; 5021 cases and 10,042 controls (all heat injuries) <sup>†</sup>                                                      | <b>Women</b><br>All heat injuries: 20.7%<br><br><b>Men</b><br>All heat injuries: 79.3%<br><b>Risk factors</b><br>Female: OR; 1.5 (1.4 - 1.7)<br>Age < 20 years: OR; 2.1 (1.4 - 3.1)<br>Other ethnicity*: OR; 1.2 (1.0 -1.4)<br>Combat: OR; 1.5 (1.4 - 1.6)<br>Lower level of education: OR; 2.0 (1.2 – 3.1)<br>Less than 1 year of service: OR; 2.3 (2.0 – 2.6) |
| Army Medical Surveillance Activity, 2003 | USA | Descriptive epidemiology; 2002        | US Army; 1816 all heat injuries cases <sup>†</sup>                                                                            | <b>Women</b><br>All heat injuries: 3.5 <sup>†</sup><br><br><b>Men</b><br>All heat injuries: 5.1 <sup>†</sup>                                                                                                                                                                                                                                                    |
| Carter et al, 2005                       | USA | Cross-sectional 1980 - 2002           | US Army; 5246 all heat injuries cases <sup>†</sup><br>4521 males and 725 females                                              | <b>Women</b><br>All heat injuries: 13.7%<br><b>Men</b><br>All heat injuries: 86.3%<br><b>Risk factors</b>                                                                                                                                                                                                                                                       |

|    |                                          |     |                                |                                                                                                                                                                                                                |
|----|------------------------------------------|-----|--------------------------------|----------------------------------------------------------------------------------------------------------------------------------------------------------------------------------------------------------------|
|    |                                          |     |                                | Female: IDR: 1.21 (1.09 – 1.40)<br>Infantry soldiers and gun crew men: IDR; 2.69 (1.71 – 2.89)<br>African and Hispanic ethnicity: IDR; 0.76 (0.71 – 0.82)<br>Northern state of origin: IDR; 1.69 (1.42 – 1.90) |
| 7  | Army Medical Surveillance Activity, 2006 | USA | Descriptive epidemiology; 2005 | US Armed Forces; 204 heat stroke cases<br>958 heat exhaustion cases                                                                                                                                            |
| 8  |                                          |     |                                | <b>Women</b><br>Heat stroke: 0.26†<br>Heat exhaustion: 2.89†                                                                                                                                                   |
| 9  |                                          |     |                                | <b>Men</b><br>Heat stroke: 0.48†<br>Heat exhaustion: 1.98†                                                                                                                                                     |
| 13 | Wallace et al, 2005                      | USA | Case-control 1988 - 1996       | US Army;<br>5246 cases of heat illness;<br>4521 males and 725 females                                                                                                                                          |
| 14 |                                          |     |                                | <b>Risk factors</b><br><b>Females</b><br>Run time ≥ 6.9 minutes:<br>OR; 5.30 (1.59 – 17.64)                                                                                                                    |
| 15 |                                          |     |                                | <b>Males</b><br>Run time ≥ 12.9 minutes:<br>OR; 5.61 (3.73 – 8.45)                                                                                                                                             |
| 16 |                                          |     |                                | BMI ≥ 26 kg/m <sup>2</sup> :<br>OR; 2.10 (1.59 – 2.78)                                                                                                                                                         |
| 23 | Army Medical Surveillance Activity, 2007 | USA | Descriptive epidemiology; 2006 | US Armed Forces; 259 heat stroke cases<br>1854 heat exhaustion cases                                                                                                                                           |
| 24 |                                          |     |                                | <b>Women</b><br>Heat stroke: 0.14†<br>Heat exhaustion: 1.49†                                                                                                                                                   |
| 25 |                                          |     |                                | <b>Men</b><br>Heat stroke: 0.22†<br>Heat exhaustion: 1.34†                                                                                                                                                     |
| 29 | Army Medical Surveillance Activity, 2008 | USA | Descriptive epidemiology; 2007 | US Armed Forces; 329 heat stroke cases<br>1853 heat exhaustion cases                                                                                                                                           |
| 30 |                                          |     |                                | <b>Women</b><br>Heat stroke: 0.14†<br>Heat exhaustion: 1.62†                                                                                                                                                   |
| 31 |                                          |     |                                | <b>Men</b><br>Heat stroke: 0.26†<br>Heat exhaustion: 1.34†                                                                                                                                                     |
| 35 | Army Medical Surveillance Activity, 2009 | USA | Descriptive epidemiology; 2008 | US Armed Forces; 299 heat stroke cases<br>1467 heat exhaustion cases                                                                                                                                           |
| 36 |                                          |     |                                | <b>Women</b><br>Heat stroke: 0.16†<br>Heat exhaustion: 1.35†                                                                                                                                                   |
| 37 |                                          |     |                                | <b>Men</b><br>Heat stroke: 0.22†<br>Heat exhaustion: 0.98†                                                                                                                                                     |

1  
2  
3  
4  
5  
6  
7  
8  
9  
10  
11  
12  
13  
14  
15  
16  
17  
18  
19  
20  
21  
22  
23  
24  
25  
26  
27  
28  
29  
30  
31  
32  
33  
34  
35  
36  
37  
38  
39  
40  
41  
42  
43  
44  
45  
46

|                                          |         |                                           |                                                                        |                                                                                                                                                                                                                                                                                                                                                                                                                                   |
|------------------------------------------|---------|-------------------------------------------|------------------------------------------------------------------------|-----------------------------------------------------------------------------------------------------------------------------------------------------------------------------------------------------------------------------------------------------------------------------------------------------------------------------------------------------------------------------------------------------------------------------------|
| Army Medical Surveillance Activity, 2010 | USA     | Descriptive epidemiology; 2009            | US Armed Forces; 323 heat stroke cases 2038 other heat injuries cases* | <b>Women</b><br>Heat stroke: 0.15†<br>Other heat injuries: 1.78†<br><b>Men</b><br>Heat stroke: 0.22†<br>Other heat injuries: 1.35†                                                                                                                                                                                                                                                                                                |
| Army Medical Surveillance Activity, 2011 | USA     | Descriptive epidemiology; 2010            | US Armed Forces; 311 heat stroke cases 2576 other heat injuries cases* | <b>Women</b><br>Heat stroke: 0.12†<br>Other heat injuries: 2.32†<br><b>Men</b><br>Heat stroke: 0.23†<br>Other heat injuries: 1.67†                                                                                                                                                                                                                                                                                                |
| Army Medical Surveillance Activity, 2012 | USA     | Descriptive epidemiology; 2011            | US Armed Forces; 362 heat stroke cases 2652 other heat injuries cases* | <b>Women</b><br>Heat stroke: 0.10†<br>Other heat injuries: 2.63†<br><b>Men</b><br>Heat stroke: 0.27†<br>Other heat injuries: 1.68†                                                                                                                                                                                                                                                                                                |
| Druyan et al, 2012                       | Israael | Retrospective cross-sectional 2008 – 2010 | Israeli Defence Forces; 170 males and 9 females                        | <b>Heat tolerance parameters</b><br><b>Women</b><br>Heat intolerance rate: 66.6%<br>Baseline Trec (° C): 37.18 ± 0.09<br>Endpoint Trec (° C): 38.14 ± 0.14<br>Baseline HR (bpm): 82.11 ± 4.88<br>Endpoint HR (bpm): 141.50 ± 7.84<br><b>Men</b><br>Heat intolerance rate: 25.79%<br>Baseline Trec (° C): 37.07 ± 0.02<br>Endpoint Trec (° C): 37.93 ± 0.03<br>Baseline HR (bpm): 73.94 ± 1.17<br>Endpoint HR (bpm): 126.50 ± 1.79 |
| Army Medical Surveillance Activity, 2013 | USA     | Descriptive epidemiology; 2012            | US Armed Forces; 365 heat stroke cases 2257 other heat injuries cases* | <b>Women</b><br>Heat stroke: 0.15†<br>Other heat injuries: 2.35†<br><b>Men</b><br>Heat stroke: 0.27†<br>Other heat injuries: 1.44†                                                                                                                                                                                                                                                                                                |

|                                                                                        |                                          |     |                                |                                                                              |                                                                                                                                                                                                                                                                                                                                                                                                                                                                                                                                              |
|----------------------------------------------------------------------------------------|------------------------------------------|-----|--------------------------------|------------------------------------------------------------------------------|----------------------------------------------------------------------------------------------------------------------------------------------------------------------------------------------------------------------------------------------------------------------------------------------------------------------------------------------------------------------------------------------------------------------------------------------------------------------------------------------------------------------------------------------|
| 1<br>2<br>3<br>4<br>5<br>6<br>7<br>8                                                   | Army Medical Surveillance Activity, 2014 | USA | Descriptive epidemiology; 2013 | US Armed Forces; 324 heat stroke cases<br>1701 other heat injuries cases*    | <b><u>Women</u></b><br>Heat stroke: 0.15†<br>Other heat injuries: 1.30†<br><b><u>Men</u></b><br>Heat stroke: 0.24†<br>Other heat injuries: 1.19†                                                                                                                                                                                                                                                                                                                                                                                             |
| 9<br>10<br>11<br>12                                                                    | Bedno et al, 2014                        | USA | Analytical cross-sectional     | US Armed Forces;<br>80 exertional heat illness cases                         | <b><u>Women</u></b><br>Heat illness: 0.680%<br><b><u>Men</u></b><br>Heat illness: 0.71%                                                                                                                                                                                                                                                                                                                                                                                                                                                      |
| 13<br>14<br>15<br>16<br>17<br>18                                                       | Army Medical Surveillance Activity, 2015 | USA | Descriptive epidemiology; 2014 | US Armed Forces;<br>314 heat stroke cases<br>1410 other heat injuries cases* | <b><u>Women</u></b><br>Heat stroke: 0.14†<br>Other heat injuries: 1.31†<br><b><u>Men</u></b><br>Heat stroke: 0.27†<br>Other heat injuries: 1.21†                                                                                                                                                                                                                                                                                                                                                                                             |
| 19<br>20<br>21<br>22<br>23<br>24<br>25<br>26<br>27<br>28<br>29<br>30<br>31<br>32<br>33 | Kazman et al, 2015                       | USA | Analytical cross-sectional     | Military and university community members;<br>55 males and 20 females        | <b><u>Heat tolerance parameters</u></b><br><b><u>Women</u></b><br>Heat intolerance rate: 45%<br>Baseline Trec (° C): 37.1 ± 0.4<br>Endpoint Trec (° C): 38.1 ± 0.4<br>Baseline HR (bpm): 76 ± 15.0<br>Endpoint HR (bpm): 137 ± 20.1<br><b><u>Men</u></b><br>Heat intolerance rate: 18%<br>Baseline Trec (° C): 36.9 ± 0.4<br>Endpoint Trec (° C): 38.1 ± 0.4<br>Baseline HR (bpm): 68 ± 12.1<br>Endpoint HR (bpm): 122 ± 20.2<br><b><u>Risk factors</u></b><br>Female: OR; 3.68 (1.21 – 11.24)<br>VO <sub>2max</sub> : OR; 0.9 (0.76 – 0.96) |
| 34<br>35<br>36<br>37<br>38<br>39<br>40<br>41<br>42<br>43<br>44<br>45<br>46             | Army Medical Surveillance Activity, 2016 | USA | Descriptive epidemiology; 2015 | US Armed Forces;<br>417 heat stroke cases<br>1625 other heat injuries cases* | <b><u>Women</u></b><br>Heat stroke: 0.16†<br>Other heat injuries: 1.54†<br><b><u>Men</u></b><br>Heat stroke: 0.35†<br>Other heat injuries: 1.48†                                                                                                                                                                                                                                                                                                                                                                                             |



1  
2  
3  
4  
5  
6  
7  
8  
9  
10  
11  
12  
13  
14  
15  
16  
17  
18  
19  
20  
21  
22  
23  
24  
25  
26  
27  
28  
29  
30  
31  
32  
33  
34  
35  
36  
37  
38  
39  
40  
41  
42  
43  
44  
45  
46

|                                          |     |                                  |                                                                                                                             |                                                                                                                                                                                                     |
|------------------------------------------|-----|----------------------------------|-----------------------------------------------------------------------------------------------------------------------------|-----------------------------------------------------------------------------------------------------------------------------------------------------------------------------------------------------|
| Army Medical Surveillance Activity, 2017 | USA | Descriptive epidemiology; 2016   | US Armed Forces; 401 heat stroke cases<br>2135 other heat injuries cases*                                                   | <b>Women</b><br>Heat stroke: 0.19†<br>Other heat injuries: 1.90†<br><b>Men</b><br>Heat stroke: 0.33†<br>Other heat injuries: 1.61†                                                                  |
| Army Medical Surveillance Activity, 2018 | USA | Descriptive epidemiology; 2017   | US Armed Forces; 464 heat stroke cases<br>1699 heat exhaustion cases                                                        | <b>Women</b><br>Heat stroke: 0.25†<br>Other heat injuries: 1.38†<br><b>Men</b><br>Heat stroke: 0.41†<br>Other heat injuries: 1.41†                                                                  |
| Singer et al, 2018                       | USA | Retrospective cohort 1992 - 2012 | SCT and non-SCT US Armed Forces<br>SCT: 214 exertional heat illness cases<br><br>Non-SCT: 577 exertional heat illness cases | <b>Women</b><br>Exertional heat illness: 13.89†<br><b>Men</b><br>Exertional heat illness: 14.79†<br><b>Women</b><br>Exertional heat illness: 13.14†<br><b>Men</b><br>Exertional heat illness: 7.79† |

§ Proportions and incidences reported are of the total cases reported in the articles  
# Incidence rate reported per 100,000 person-years.  
‡ Incidence rate per 100,000 person- months.  
† Incidence rate reported per 1000 person-years.  
\* Other heat injuries include “heat exhaustion” and “unspecified effects of heat”.  
‡ heat injuries include heat stroke and other heat injuries.  
SCT = Sickle cell trait  
US = United States of America; 2006 to date, heat injuries was reported in the US Armed Forces (Army, Navy, Air Force and Marine Corps).  
UK = United Kingdom; USA = United States of America

**Supplemental Table 3: Incidence rates of Heat stroke in women compared to men in the Armed Forces**

| Reference, year                          | Country | Study design                      | Study duration | Population                                | ICD codes                        | Heat stroke |      |
|------------------------------------------|---------|-----------------------------------|----------------|-------------------------------------------|----------------------------------|-------------|------|
|                                          |         |                                   |                |                                           |                                  | Women       | Men  |
| Army Medical Surveillance Activity, 2006 | USA     | Descriptive epidemiology;         | 2005 (1 year)  | US Armed Forces;<br>204 heat stroke cases | ICD-9-CM: 992.0                  | 0.26        | 0.48 |
| Army Medical Surveillance Activity, 2007 | USA     | Descriptive epidemiology;         | 2006 (1 year)  | US Armed Forces;<br>259 heat stroke cases | ICD-9-CM: 992.0                  | 0.14        | 0.22 |
| Army Medical Surveillance Activity, 2008 | USA     | Descriptive epidemiology;         | 2007 (1 year)  | US Armed Forces;<br>329 heat stroke cases | ICD-9-CM: 992.0                  | 0.14        | 0.26 |
| Army Medical Surveillance Activity, 2009 | USA     | Descriptive epidemiology;         | 2008 (1 year)  | US Armed Forces;<br>299 heat stroke cases | ICD-9-CM: 992.0                  | 0.16        | 0.22 |
| Army Medical Surveillance Activity, 2010 | USA     | Descriptive epidemiology;         | 2009 (1 year)  | US Armed Forces;<br>323 heat stroke cases | ICD-9-CM: 992.0                  | 0.15        | 0.24 |
| Army Medical Surveillance Activity, 2011 | USA     | Descriptive epidemiology;         | 2010 (1 year)  | US Armed Forces;<br>311 heat stroke cases | ICD-9-CM: 992.0                  | 0.12        | 0.23 |
| Army Medical Surveillance Activity, 2012 | USA     | Descriptive epidemiology;         | 2011 (1 year)  | US Armed Forces;<br>362 heat stroke cases | ICD-9-CM: 992.0                  | 0.10        | 0.27 |
| Army Medical Surveillance Activity, 2013 | USA     | Descriptive epidemiology;         | 2012 (1 year)  | US Armed Forces;<br>365 heat stroke cases | ICD-9-CM: 992.0                  | 0.15        | 0.27 |
| Army Medical Surveillance Activity, 2014 | USA     | Descriptive epidemiology;<br>2013 | 2013 (1 year)  | US Armed Forces;<br>324 heat stroke cases | ICD-9-CM: 992.0                  | 0.15        | 0.24 |
| Army Medical Surveillance Activity, 2015 | USA     | Descriptive epidemiology;         | 2014 (1 year)  | US Armed Forces;<br>314 heat stroke cases | ICD-9-CM: 992.0                  | 0.14        | 0.27 |
| Army Medical Surveillance Activity, 2016 | USA     | Descriptive epidemiology;         | 2015 (1 year)  | US Armed Forces;<br>417 heat stroke cases | ICD-9-CM: 992.0<br>ICD 10: T67.0 | 0.16        | 0.35 |

1  
2  
3  
4  
5  
6  
7  
8  
9  
10  
11  
12  
13  
14  
15  
16  
17  
18  
19  
20  
21  
22  
23  
24  
25  
26  
27  
28  
29  
30  
31  
32  
33  
34  
35  
36  
37  
38  
39  
40  
41  
42  
43  
44  
45  
46

|                                          |     |                           |               |                                                                         |                                  |      |      |
|------------------------------------------|-----|---------------------------|---------------|-------------------------------------------------------------------------|----------------------------------|------|------|
| Army Medical Surveillance Activity, 2017 | USA | Descriptive epidemiology; | 2016 (1 year) | US Armed Forces;<br>401 heat stroke cases                               | ICD-9-CM: 992.0<br>ICD 10: T67.0 | 0.19 | 0.33 |
| Army Medical Surveillance Activity, 2018 | USA | Descriptive epidemiology; | 2017 (1 year) | US Armed Forces;<br>464 heat stroke cases<br>1699 heat exhaustion cases | ICD-9-CM: 992.0<br>ICD 10: T67.0 | 0.25 | 0.41 |

For peer review only

**Supplemental Table 4: Incidence rates of other heat injuries (heat exhaustion and unspecified effects of heat and light) in women compared to men in the Armed Forces**

| Reference, year                          | Country | Study design              | Study duration | Population                                       | ICD codes                      | Other heat injuries |      |
|------------------------------------------|---------|---------------------------|----------------|--------------------------------------------------|--------------------------------|---------------------|------|
|                                          |         |                           |                |                                                  |                                | Women               | Men  |
| Army Medical Surveillance Activity, 2006 | USA     | Descriptive epidemiology; | 2005 (1 year)  | US Armed Forces; 958 heat exhaustion cases       | ICD-9-CM: 992.3 – 992.5        | 2.89                | 1.98 |
| Army Medical Surveillance Activity, 2007 | USA     | Descriptive epidemiology; | 2006 (1 year)  | US Armed Forces; 1854 heat exhaustion cases      | ICD-9-CM: 992.3 – 992.5        | 1.49                | 1.34 |
| Army Medical Surveillance Activity, 2008 | USA     | Descriptive epidemiology; | 2007 (1 year)  | US Armed Forces; 1853 heat exhaustion cases      | ICD-9-CM: 992.3 – 992.5        | 1.62                | 1.34 |
| Army Medical Surveillance Activity, 2009 | USA     | Descriptive epidemiology; | 2008 (1 year)  | US Armed Forces; 1467 heat exhaustion cases      | ICD-9-CM: 992.3 – 992.5        | 1.35                | 0.98 |
| Army Medical Surveillance Activity, 2010 | USA     | Descriptive epidemiology; | 2009 (1 year)  | US Armed Forces; 2038 other heat injuries cases* | ICD-9-CM: 992.3 – 992.5; 992.9 | 1.78                | 1.35 |
| Army Medical Surveillance Activity, 2011 | USA     | Descriptive epidemiology; | 2010 (1 year)  | US Armed Forces; 2576 other heat injuries cases* | ICD-9-CM: 992.3 – 992.5; 992.9 | 2.32                | 1.67 |
| Army Medical Surveillance Activity, 2012 | USA     | Descriptive epidemiology; | 2011 (1 year)  | US Armed Forces; 2652 other heat injuries cases* | ICD-9-CM: 992.3 – 5; 992.9     | 2.63                | 1.68 |
| Army Medical Surveillance Activity, 2013 | USA     | Descriptive epidemiology; | 2012 (1 year)  | US Armed Forces; 2257 other heat injuries cases* | ICD-9-CM: 992.3 – 992.5; 992.9 | 2.35                | 1.44 |
| Army Medical Surveillance Activity, 2014 | USA     | Descriptive epidemiology; | 2013 (1 year)  | US Armed Forces; 1701 other heat injuries cases* | ICD-9-CM: 992.3 – 992.5; 992.9 | 1.30                | 1.19 |
| Army Medical Surveillance Activity, 2015 | USA     | Descriptive epidemiology; | 2014 (1 year)  | US Armed Forces; 1410 other heat injuries cases* | ICD-9-CM: 992.3 – 992.5; 992.9 | 1.31                | 1.21 |

1  
2  
3  
4  
5  
6  
7  
8  
9  
10  
11  
12  
13  
14  
15  
16  
17  
18  
19  
20  
21  
22  
23  
24  
25  
26  
27  
28  
29  
30  
31  
32  
33  
34  
35  
36  
37  
38  
39  
40  
41  
42  
43  
44  
45  
46

For peer review only

|                                          |     |                           |               |                                                  |                                                                |      |      |
|------------------------------------------|-----|---------------------------|---------------|--------------------------------------------------|----------------------------------------------------------------|------|------|
| Army Medical Surveillance Activity, 2016 | USA | Descriptive epidemiology; | 2015 (1 year) | US Armed Forces; 1625 other heat injuries cases* | ICD-9-CM: 992.3 – 992.5; 992.9<br>ICD 10: T67.3 – T67.5; T67.9 | 1.54 | 1.48 |
| Army Medical Surveillance Activity, 2017 | USA | Descriptive epidemiology; | 2016 (1 year) | US Armed Forces; 2135 other heat injuries cases* | ICD-9-CM: 992.3 – 992.5; 992.9<br>ICD 10: T67.3 – T67.5; T67.9 | 1.90 | 1.61 |
| Army Medical Surveillance Activity, 2018 | USA | Descriptive epidemiology; | 2017 (1 year) | US Armed Forces; 1699 heat exhaustion cases      | ICD-9-CM: 992.3 – 992.5<br>ICD 10: T67.3 – T67.5               | 1.38 | 1.41 |

**Supplemental Table 3: Quality assessment of included studies using the quality assessment tool for studies with diverse designs (QATSDD)**

| QATSDD Criteria       | 1 | 2 | 3 | 4 | 5 | 6 | 7 | 8 | 9 | 10 | 11 | 12 | Total score | % of total score |
|-----------------------|---|---|---|---|---|---|---|---|---|----|----|----|-------------|------------------|
| Dickinson' 94[23]     | 0 | 1 | 2 | 0 | 1 | 3 | 0 | 0 | 3 | 2  | 0  | 2  | 14/36       | 38.9             |
| AMSA'95[31]           | 0 | 0 | 0 | 0 | 0 | 0 | 0 | 0 | 0 | 0  | 0  | 0  | 0/36        | 0                |
| AMSA' 96[32]          | 0 | 0 | 0 | 0 | 0 | 0 | 0 | 0 | 0 | 0  | 0  | 0  | 0/36        | 0                |
| AMSA'97[33]           | 0 | 0 | 0 | 0 | 0 | 0 | 0 | 0 | 0 | 0  | 0  | 0  | 0/36        | 0                |
| AMSA'98[24]           | 2 | 1 | 1 | 0 | 0 | 0 | 0 | 0 | 2 | 2  | 0  | 0  | 8/36        | 22.2             |
| AMSA'00[27]           | 2 | 1 | 2 | 0 | 0 | 1 | 0 | 0 | 2 | 3  | 0  | 0  | 11/36       | 30.6             |
| AMSA'02[25]           | 3 | 0 | 2 | 0 | 1 | 1 | 0 | 0 | 2 | 0  | 2  | 0  | 11/36       | 30.6             |
| AMSA'03[26]           | 2 | 1 | 1 | 0 | 1 | 1 | 0 | 0 | 2 | 2  | 0  | 0  | 10/36       | 27.8             |
| Carter et al' 05[28]  | 3 | 3 | 3 | 2 | 2 | 3 | 1 | 2 | 3 | 3  | 2  | 0  | 27/36       | 75               |
| AMSA'06[30]           | 2 | 1 | 1 | 0 | 1 | 1 | 0 | 0 | 2 | 2  | 0  | 0  | 10/36       | 27.8             |
| Wallace et al' 06[46] | 3 | 3 | 3 | 2 | 2 | 3 | 1 | 2 | 3 | 3  | 2  | 2  | 29/36       | 80.6             |
| AMSA'07[34]           | 1 | 1 | 1 | 0 | 0 | 1 | 0 | 0 | 2 | 2  | 0  | 0  | 8/36        | 22.2             |
| AMSA' 08[35]          | 1 | 1 | 1 | 0 | 0 | 1 | 0 | 0 | 2 | 2  | 0  | 0  | 8/36        | 22.2             |
| AMSA' 09[36]          | 1 | 1 | 1 | 0 | 0 | 1 | 0 | 0 | 2 | 2  | 0  | 0  | 8/36        | 22.2             |
| AMSA' 10[37]          | 1 | 1 | 2 | 0 | 0 | 1 | 0 | 0 | 2 | 2  | 0  | 2  | 11/36       | 30.6             |
| AMSA' 11[38]          | 2 | 1 | 2 | 0 | 0 | 1 | 0 | 0 | 2 | 2  | 0  | 2  | 12/36       | 33.3             |
| Druyan et al'12[15]   | 3 | 3 | 3 | 1 | 0 | 2 | 0 | 3 | 3 | 2  | 2  | 1  | 23/36       | 63.9             |
| AMSA' 12[39]          | 2 | 1 | 2 | 0 | 0 | 1 | 0 | 0 | 2 | 2  | 0  | 2  | 12/36       | 33.3             |
| AMSA' 13[40]          | 2 | 2 | 2 | 0 | 0 | 2 | 0 | 0 | 2 | 2  | 0  | 2  | 14/36       | 38.9             |
| AMSA' 14[41]          | 2 | 2 | 2 | 0 | 0 | 2 | 0 | 0 | 2 | 3  | 0  | 2  | 15/36       | 41.7             |
| AMSA' 15[42]          | 3 | 2 | 2 | 0 | 0 | 2 | 0 | 0 | 2 | 3  | 0  | 2  | 16/36       | 44.4             |
| Bedno et al, 2015[29] | 3 | 3 | 3 | 2 | 2 | 3 | 3 | 3 | 3 | 3  | 3  | 3  | 34/36       | 94.4             |
| Kazman et al' 15[47]  | 3 | 3 | 3 | 2 | 2 | 3 | 2 | 3 | 3 | 3  | 3  | 3  | 33/36       | 91.7             |
| AMSA' 16[43]          | 3 | 2 | 2 | 0 | 0 | 2 | 0 | 0 | 2 | 3  | 0  | 2  | 16/36       | 44.4             |
| AMSA' 17[44]          | 3 | 2 | 2 | 0 | 0 | 2 | 0 | 0 | 2 | 3  | 0  | 2  | 16/36       | 44.4             |
| AMSA' 18[45]          | 3 | 2 | 2 | 0 | 0 | 2 | 0 | 0 | 2 | 3  | 0  | 2  | 16/36       | 44.4             |
| Singer et al,18[21]   | 3 | 3 | 3 | 3 | 3 | 3 | 2 | 3 | 3 | 3  | 3  | 3  | 35/36       | 97.2             |

**QATSDD Criteria**

- (1) Theoretical framework; (6) Procedure for data collection (11) Good justification for analytical method selected  
(2) Aims/objectives; (7) Rationale for choice of data collection tool(s) (12) Strengths and limitations.  
(3) Description of research setting (8) Detailed recruitment data  
(4) Sample size; (9) Fit between research question and method of data collection (Quantitative only)  
(5) Representative sample of target group (10) Fit between research question and method of analysis (Quantitative only)  
QATSDD rating scale: 0=not at all; 1=very slightly; 2=moderately; 3=complete; AMSA = Army Medical Surveillance Activity

1  
2  
3  
4  
5  
6  
7  
8  
9  
10  
11  
12  
13  
14  
15  
16  
17  
18  
19  
20  
21  
22  
23  
24  
25  
26  
27  
28  
29  
30  
31  
32  
33  
34  
35  
36  
37  
38  
39  
40  
41  
42  
43  
44  
45  
46  
47  
48  
49  
50  
51  
52  
53  
54  
55  
56  
57  
58  
59  
60

| Study or Subgroup                                                                                        | Women (rate/100000) |                | Men (rate/100000) |                | Weight        | Risk Ratio<br>M-H, Random, 95% CI | Risk Ratio<br>M-H, Random, 95% CI |
|----------------------------------------------------------------------------------------------------------|---------------------|----------------|-------------------|----------------|---------------|-----------------------------------|-----------------------------------|
|                                                                                                          | Events              | Total          | Events            | Total          |               |                                   |                                   |
| <b>1.1.1 Heat exhaustion and unspecified effects of heat and light</b>                                   |                     |                |                   |                |               |                                   |                                   |
| AMSA 2010                                                                                                | 178                 | 100000         | 135               | 100000         | 10.5%         | 1.32 [1.05, 1.65]                 |                                   |
| AMSA 2011                                                                                                | 232                 | 100000         | 167               | 100000         | 13.0%         | 1.39 [1.14, 1.69]                 |                                   |
| AMSA 2012                                                                                                | 263                 | 100000         | 168               | 100000         | 0.0%          | 1.57 [1.29, 1.90]                 |                                   |
| AMSA 2013                                                                                                | 235                 | 100000         | 144               | 100000         | 0.0%          | 1.63 [1.33, 2.01]                 |                                   |
| AMSA 2014                                                                                                | 130                 | 100000         | 119               | 100000         | 8.6%          | 1.09 [0.85, 1.40]                 |                                   |
| AMSA 2015                                                                                                | 131                 | 100000         | 121               | 100000         | 8.7%          | 1.08 [0.85, 1.39]                 |                                   |
| AMSA 2016                                                                                                | 154                 | 100000         | 148               | 100000         | 10.3%         | 1.04 [0.83, 1.30]                 |                                   |
| AMSA 2017                                                                                                | 190                 | 100000         | 161               | 100000         | 11.8%         | 1.18 [0.96, 1.46]                 |                                   |
| <b>Subtotal (95% CI)</b>                                                                                 |                     | <b>600000</b>  |                   | <b>600000</b>  | <b>62.8%</b>  | <b>1.19 [1.08, 1.31]</b>          |                                   |
| Total events                                                                                             | 1015                |                | 851               |                |               |                                   |                                   |
| Heterogeneity: Tau <sup>2</sup> = 0.00; Chi <sup>2</sup> = 5.52, df = 5 (P = 0.36); I <sup>2</sup> = 9%  |                     |                |                   |                |               |                                   |                                   |
| Test for overall effect: Z = 3.56 (P = 0.0004)                                                           |                     |                |                   |                |               |                                   |                                   |
| <b>1.1.2 Heat exhaustion</b>                                                                             |                     |                |                   |                |               |                                   |                                   |
| AMSA 2006                                                                                                | 289                 | 100000         | 198               | 100000         | 0.0%          | 1.46 [1.22, 1.75]                 |                                   |
| AMSA 2007                                                                                                | 149                 | 100000         | 134               | 100000         | 9.7%          | 1.11 [0.88, 1.40]                 |                                   |
| AMSA 2008                                                                                                | 162                 | 100000         | 134               | 100000         | 10.0%         | 1.21 [0.96, 1.52]                 |                                   |
| AMSA 2009                                                                                                | 135                 | 100000         | 98                | 100000         | 7.9%          | 1.38 [1.06, 1.79]                 |                                   |
| AMSA 2018                                                                                                | 138                 | 100000         | 141               | 100000         | 9.6%          | 0.98 [0.77, 1.24]                 |                                   |
| <b>Subtotal (95% CI)</b>                                                                                 |                     | <b>400000</b>  |                   | <b>400000</b>  | <b>37.2%</b>  | <b>1.15 [1.01, 1.32]</b>          |                                   |
| Total events                                                                                             | 584                 |                | 507               |                |               |                                   |                                   |
| Heterogeneity: Tau <sup>2</sup> = 0.00; Chi <sup>2</sup> = 3.93, df = 3 (P = 0.27); I <sup>2</sup> = 24% |                     |                |                   |                |               |                                   |                                   |
| Test for overall effect: Z = 2.05 (P = 0.04)                                                             |                     |                |                   |                |               |                                   |                                   |
| <b>Total (95% CI)</b>                                                                                    |                     | <b>1000000</b> |                   | <b>1000000</b> | <b>100.0%</b> | <b>1.18 [1.09, 1.27]</b>          |                                   |
| Total events                                                                                             | 1599                |                | 1358              |                |               |                                   |                                   |
| Heterogeneity: Tau <sup>2</sup> = 0.00; Chi <sup>2</sup> = 9.66, df = 9 (P = 0.38); I <sup>2</sup> = 7%  |                     |                |                   |                |               |                                   |                                   |
| Test for overall effect: Z = 4.24 (P < 0.0001)                                                           |                     |                |                   |                |               |                                   |                                   |
| Test for subgroup differences: Chi <sup>2</sup> = 0.14, df = 1 (P = 0.71), I <sup>2</sup> = 0%           |                     |                |                   |                |               |                                   |                                   |

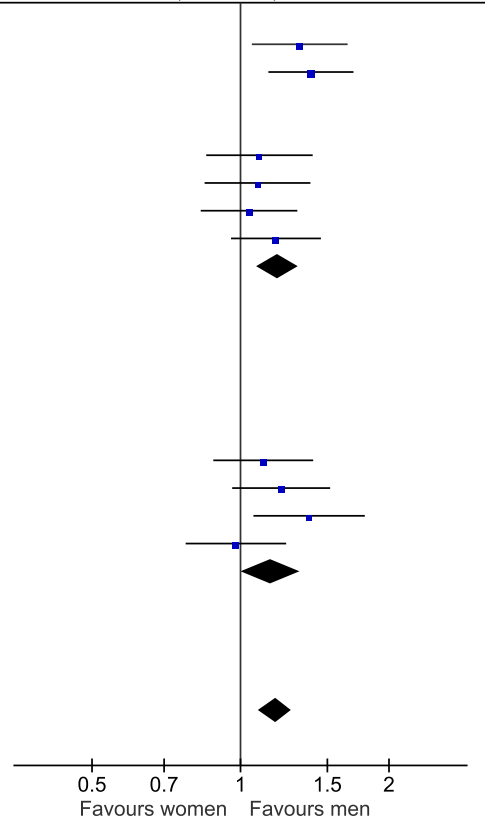



# PRISMA 2009 Checklist

1  
2  
3  
4  
5  
6  
7  
8  
9  
10  
11  
12  
13  
14  
15  
16  
17  
18  
19  
20  
21  
22  
23  
24  
25  
26  
27  
28  
29  
30  
31  
32  
33  
34  
35  
36  
37  
38  
39  
40  
41  
42  
43  
44  
45  
46  
47

| Section/topic                      | #  | Checklist item                                                                                                                                                                                                                                                                                              | Reported on page #      |
|------------------------------------|----|-------------------------------------------------------------------------------------------------------------------------------------------------------------------------------------------------------------------------------------------------------------------------------------------------------------|-------------------------|
| <b>TITLE</b>                       |    |                                                                                                                                                                                                                                                                                                             |                         |
| Title                              | 1  | Identify the report as a systematic review, meta-analysis, or both.                                                                                                                                                                                                                                         | 1                       |
| <b>ABSTRACT</b>                    |    |                                                                                                                                                                                                                                                                                                             |                         |
| Structured summary                 | 2  | Provide a structured summary including, as applicable: background; objectives; data sources; study eligibility criteria, participants, and interventions; study appraisal and synthesis methods; results; limitations; conclusions and implications of key findings; systematic review registration number. | 2                       |
| <b>INTRODUCTION</b>                |    |                                                                                                                                                                                                                                                                                                             |                         |
| Rationale                          | 3  | Describe the rationale for the review in the context of what is already known.                                                                                                                                                                                                                              | 5                       |
| Objectives                         | 4  | Provide an explicit statement of questions being addressed with reference to participants, interventions, comparisons, outcomes, and study design (PICOS).                                                                                                                                                  | 6                       |
| <b>METHODS</b>                     |    |                                                                                                                                                                                                                                                                                                             |                         |
| Protocol and registration          | 5  | Indicate if a review protocol exists, if and where it can be accessed (e.g., Web address), and, if available, provide registration information including registration number.                                                                                                                               | 6                       |
| Eligibility criteria               | 6  | Specify study characteristics (e.g., PICOS, length of follow-up) and report characteristics (e.g., years considered, language, publication status) used as criteria for eligibility, giving rationale.                                                                                                      | 6                       |
| Information sources                | 7  | Describe all information sources (e.g., databases with dates of coverage, contact with study authors to identify additional studies) in the search and date last searched.                                                                                                                                  | 6                       |
| Search                             | 8  | Present full electronic search strategy for at least one database, including any limits used, such that it could be repeated.                                                                                                                                                                               | 6, supplementary file 1 |
| Study selection                    | 9  | State the process for selecting studies (i.e., screening, eligibility, included in systematic review, and, if applicable, included in the meta-analysis).                                                                                                                                                   | Figure 1                |
| Data collection process            | 10 | Describe method of data extraction from reports (e.g., piloted forms, independently, in duplicate) and any processes for obtaining and confirming data from investigators.                                                                                                                                  | 7                       |
| Data items                         | 11 | List and define all variables for which data were sought (e.g., PICOS, funding sources) and any assumptions and simplifications made.                                                                                                                                                                       | 7                       |
| Risk of bias in individual studies | 12 | Describe methods used for assessing risk of bias of individual studies (including specification of whether this was done at the study or outcome level), and how this information is to be used in any data synthesis.                                                                                      | 7                       |
| Summary measures                   | 13 | State the principal summary measures (e.g., risk ratio, difference in means).                                                                                                                                                                                                                               | 8                       |





# PRISMA 2009 Checklist

|                      |    |                                                                                                                                                           |   |
|----------------------|----|-----------------------------------------------------------------------------------------------------------------------------------------------------------|---|
| Synthesis of results | 14 | Describe the methods of handling data and combining results of studies, if done, including measures of consistency (e.g., $I^2$ ) for each meta-analysis. | 8 |
|----------------------|----|-----------------------------------------------------------------------------------------------------------------------------------------------------------|---|

Page 1 of 2

| Section/topic                 | #  | Checklist item                                                                                                                                                                                           | Reported on page #               |
|-------------------------------|----|----------------------------------------------------------------------------------------------------------------------------------------------------------------------------------------------------------|----------------------------------|
| Risk of bias across studies   | 15 | Specify any assessment of risk of bias that may affect the cumulative evidence (e.g., publication bias, selective reporting within studies).                                                             | 7                                |
| Additional analyses           | 16 | Describe methods of additional analyses (e.g., sensitivity or subgroup analyses, meta-regression), if done, indicating which were pre-specified.                                                         | N/A                              |
| <b>RESULTS</b>                |    |                                                                                                                                                                                                          |                                  |
| Study selection               | 17 | Give numbers of studies screened, assessed for eligibility, and included in the review, with reasons for exclusions at each stage, ideally with a flow diagram.                                          | Figure 1                         |
| Study characteristics         | 18 | For each study, present characteristics for which data were extracted (e.g., study size, PICOS, follow-up period) and provide the citations.                                                             | 8, Supplementary file 2          |
| Risk of bias within studies   | 19 | Present data on risk of bias of each study and, if available, any outcome level assessment (see item 12).                                                                                                | 15, 16                           |
| Results of individual studies | 20 | For all outcomes considered (benefits or harms), present, for each study: (a) simple summary data for each intervention group (b) effect estimates and confidence intervals, ideally with a forest plot. | 10, 12, 14, Supplementary file 2 |
| Synthesis of results          | 21 | Present results of each meta-analysis done, including confidence intervals and measures of consistency.                                                                                                  | 9, 10, 11, 12, 13, 14            |
| Risk of bias across studies   | 22 | Present results of any assessment of risk of bias across studies (see Item 15).                                                                                                                          | 16                               |
| Additional analysis           | 23 | Give results of additional analyses, if done (e.g., sensitivity or subgroup analyses, meta-regression [see Item 16]).                                                                                    | N/A                              |
| <b>DISCUSSION</b>             |    |                                                                                                                                                                                                          |                                  |
| Summary of evidence           | 24 | Summarize the main findings including the strength of evidence for each main outcome; consider their relevance to key groups (e.g., healthcare providers, users, and policy makers).                     | 17, 18, 19                       |
| Limitations                   | 25 | Discuss limitations at study and outcome level (e.g., risk of bias), and at review-level (e.g., incomplete retrieval of identified research, reporting bias).                                            | 20, 21                           |
| Conclusions                   | 26 | Provide a general interpretation of the results in the context of other evidence, and implications for future research.                                                                                  | 21, 22                           |
| <b>FUNDING</b>                |    |                                                                                                                                                                                                          |                                  |

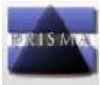

# PRISMA 2009 Checklist

1  
2  
3  
4  
5  
6  
7  
8  
9  
10  
11  
12  
13  
14  
15  
16  
17  
18  
19  
20  
21  
22  
23  
24  
25  
26  
27  
28  
29  
30  
31  
32  
33  
34  
35  
36  
37  
38  
39  
40  
41  
42  
43  
44  
45  
46  
47

|         |    |                                                                                                                                            |    |
|---------|----|--------------------------------------------------------------------------------------------------------------------------------------------|----|
| Funding | 27 | Describe sources of funding for the systematic review and other support (e.g., supply of data); role of funders for the systematic review. | 22 |
|---------|----|--------------------------------------------------------------------------------------------------------------------------------------------|----|

From: Moher D, Liberati A, Tetzlaff J, Altman DG, The PRISMA Group (2009). Preferred Reporting Items for Systematic Reviews and Meta-Analyses: The PRISMA Statement. PLoS Med 6(6): e1000097. doi:10.1371/journal.pmed1000097

For more information, visit: [www.prisma-statement.org](http://www.prisma-statement.org).

Page 2 of 2

For peer review only

## MOOSE Checklist for Meta-analyses of Observational Studies

| Item No                                     | Recommendation                                                                                                                                                                                                                                                               | Reported on Page No     |
|---------------------------------------------|------------------------------------------------------------------------------------------------------------------------------------------------------------------------------------------------------------------------------------------------------------------------------|-------------------------|
| Reporting of background should include      |                                                                                                                                                                                                                                                                              |                         |
| 1                                           | Problem definition                                                                                                                                                                                                                                                           | 4                       |
| 2                                           | Hypothesis statement                                                                                                                                                                                                                                                         | 6                       |
| 3                                           | Description of study outcome(s)                                                                                                                                                                                                                                              | 7                       |
| 4                                           | Type of exposure or intervention used                                                                                                                                                                                                                                        | 7 - 9                   |
| 5                                           | Type of study designs used                                                                                                                                                                                                                                                   | 7 - 8                   |
| 6                                           | Study population                                                                                                                                                                                                                                                             | 7                       |
| Reporting of search strategy should include |                                                                                                                                                                                                                                                                              |                         |
| 7                                           | Qualifications of searchers (eg, librarians and investigators)                                                                                                                                                                                                               | Title page              |
| 8                                           | Search strategy, including time period included in the synthesis and key words                                                                                                                                                                                               | 6, supplemental Table 1 |
| 9                                           | Effort to include all available studies, including contact with authors                                                                                                                                                                                                      | 7, Figure 1             |
| 10                                          | Databases and registries searched                                                                                                                                                                                                                                            | 6                       |
| 11                                          | Search software used, name and version, including special features used (eg, explosion)                                                                                                                                                                                      | 6, supplemental Table 1 |
| 12                                          | Use of hand searching (eg, reference lists of obtained articles)                                                                                                                                                                                                             | 7                       |
| 13                                          | List of citations located and those excluded, including justification                                                                                                                                                                                                        | 8, Table 2, Figure 1    |
| 14                                          | Method of addressing articles published in languages other than English                                                                                                                                                                                                      | 6-                      |
| 15                                          | Method of handling abstracts and unpublished studies                                                                                                                                                                                                                         | 7                       |
| 16                                          | Description of any contact with authors                                                                                                                                                                                                                                      | Figure 1                |
| Reporting of methods should include         |                                                                                                                                                                                                                                                                              |                         |
| 17                                          | Description of relevance or appropriateness of studies assembled for assessing the hypothesis to be tested                                                                                                                                                                   | 7-8                     |
| 18                                          | Rationale for the selection and coding of data (eg, sound clinical principles or convenience)                                                                                                                                                                                | 7-9                     |
| 19                                          | Documentation of how data were classified and coded (eg, multiple raters, blinding and interrater reliability)                                                                                                                                                               | 8-9                     |
| 20                                          | Assessment of confounding (eg, comparability of cases and controls in studies where appropriate)                                                                                                                                                                             | 7-8                     |
| 21                                          | Assessment of study quality, including blinding of quality assessors, stratification or regression on possible predictors of study results                                                                                                                                   | 7-8                     |
| 22                                          | Assessment of heterogeneity                                                                                                                                                                                                                                                  | 9                       |
| 23                                          | Description of statistical methods (eg, complete description of fixed or random effects models, justification of whether the chosen models account for predictors of study results, dose-response models, or cumulative meta-analysis) in sufficient detail to be replicated | 9                       |
| 24                                          | Provision of appropriate tables and graphics                                                                                                                                                                                                                                 | Tables 1-3, Figs 2-3    |
| Reporting of results should include         |                                                                                                                                                                                                                                                                              |                         |
| 25                                          | Graphic summarizing individual study estimates and overall estimate                                                                                                                                                                                                          | Figs 2-3                |
| 26                                          | Table giving descriptive information for each study included                                                                                                                                                                                                                 | Supplemental Table 2    |
| 27                                          | Results of sensitivity testing (eg, subgroup analysis)                                                                                                                                                                                                                       | Supplemental Figure 1   |

|    |                                                   |       |
|----|---------------------------------------------------|-------|
| 28 | Indication of statistical uncertainty of findings | 15-17 |
|----|---------------------------------------------------|-------|

| Item No                                 | Recommendation                                                                                                            | Reported on Page No |
|-----------------------------------------|---------------------------------------------------------------------------------------------------------------------------|---------------------|
| Reporting of discussion should include  |                                                                                                                           |                     |
| 29                                      | Quantitative assessment of bias (eg, publication bias)                                                                    | 23                  |
| 30                                      | Justification for exclusion (eg, exclusion of non-English language citations)                                             | 6                   |
| 31                                      | Assessment of quality of included studies                                                                                 | 7-8; 17-18          |
| Reporting of conclusions should include |                                                                                                                           |                     |
| 32                                      | Consideration of alternative explanations for observed results                                                            | 19-24               |
| 33                                      | Generalization of the conclusions (ie, appropriate for the data presented and within the domain of the literature review) | 24                  |
| 34                                      | Guidelines for future research                                                                                            | 24                  |
| 35                                      | Disclosure of funding source                                                                                              | 25                  |

From: Stroup DF, Berlin JA, Morton SC, et al, for the Meta-analysis Of Observational Studies in Epidemiology (MOOSE) Group. Meta-analysis of Observational Studies in Epidemiology. A Proposal for Reporting. *JAMA*. 2000;283(15):2008-2012. doi: 10.1001/jama.283.15.2008.

# BMJ Open

## A Systematic Review of the Gender Differences in the Epidemiology and Risk Factors of Exertional Heat Illness and Heat tolerance in the Armed Forces

|                                 |                                                                                                                                                                                                                                                                                                                                          |
|---------------------------------|------------------------------------------------------------------------------------------------------------------------------------------------------------------------------------------------------------------------------------------------------------------------------------------------------------------------------------------|
| Journal:                        | <i>BMJ Open</i>                                                                                                                                                                                                                                                                                                                          |
| Manuscript ID                   | bmjopen-2019-031825.R2                                                                                                                                                                                                                                                                                                                   |
| Article Type:                   | Original research                                                                                                                                                                                                                                                                                                                        |
| Date Submitted by the Author:   | 11-Dec-2019                                                                                                                                                                                                                                                                                                                              |
| Complete List of Authors:       | Alele, Faith; James Cook University, College of Healthcare Sciences Malau-Aduli, Bunmi; James Cook University, College of Medicine and Dentistry Malau-Aduli, Aduli; James Cook University, College of Public Health, Medical and Veterinary Sciences<br>Crowe, Melissa; James Cook University, Division of Tropical Health and Medicine |
| <b>Primary Subject Heading</b>: | Occupational and environmental medicine                                                                                                                                                                                                                                                                                                  |
| Secondary Subject Heading:      | Sports and exercise medicine                                                                                                                                                                                                                                                                                                             |
| Keywords:                       | OCCUPATIONAL & INDUSTRIAL MEDICINE, ACCIDENT & EMERGENCY MEDICINE, Heat Stroke, Armed Forces, Women                                                                                                                                                                                                                                      |
|                                 |                                                                                                                                                                                                                                                                                                                                          |

SCHOLARONE™  
Manuscripts



I, the Submitting Author has the right to grant and does grant on behalf of all authors of the Work (as defined in the below author licence), an exclusive licence and/or a non-exclusive licence for contributions from authors who are: i) UK Crown employees; ii) where BMJ has agreed a CC-BY licence shall apply, and/or iii) in accordance with the terms applicable for US Federal Government officers or employees acting as part of their official duties; on a worldwide, perpetual, irrevocable, royalty-free basis to BMJ Publishing Group Ltd ("BMJ") its licensees and where the relevant Journal is co-owned by BMJ to the co-owners of the Journal, to publish the Work in this journal and any other BMJ products and to exploit all rights, as set out in our [licence](#).

The Submitting Author accepts and understands that any supply made under these terms is made by BMJ to the Submitting Author unless you are acting as an employee on behalf of your employer or a postgraduate student of an affiliated institution which is paying any applicable article publishing charge ("APC") for Open Access articles. Where the Submitting Author wishes to make the Work available on an Open Access basis (and intends to pay the relevant APC), the terms of reuse of such Open Access shall be governed by a Creative Commons licence – details of these licences and which [Creative Commons](#) licence will apply to this Work are set out in our licence referred to above.

Other than as permitted in any relevant BMJ Author's Self Archiving Policies, I confirm this Work has not been accepted for publication elsewhere, is not being considered for publication elsewhere and does not duplicate material already published. I confirm all authors consent to publication of this Work and authorise the granting of this licence.

1  
2  
3 1 **A Systematic Review of the Gender Differences in the Epidemiology and Risk Factors of**  
4  
5 2 **Exertional Heat Illness and Heat tolerance in the Armed Forces**  
6  
7

8 3 **Type of article:** Review  
9

10  
11 4 **Authors**

12  
13 5 Faith O. Alele<sup>1\*</sup>

14 6 MPHTM, MBBS

15 7 [Faith.alele@my.jcu.edu.au](mailto:Faith.alele@my.jcu.edu.au)

16 8 +617 47815082  
17  
18 9

19 10 A/Prof Bunmi S. Malau-Aduli<sup>2</sup>

20 11 PhD, MSc, BSc (Hons)

21 12 [Bunmi.malauaduli@jcu.edu.au](mailto:Bunmi.malauaduli@jcu.edu.au)  
22  
23 13

24 14 A/Prof Aduli EO. Malau-Aduli<sup>3</sup>

25 15 PhD, MSc, BSc (Hons)

26 16 [Aduli.malauaduli@jcu.edu.au](mailto:Aduli.malauaduli@jcu.edu.au)  
27  
28 17

29 18 Dr Melissa Crowe<sup>4</sup>

30 19 PhD, BSc (Hons)

31 20 [Melissa.crowe@jcu.edu.au](mailto:Melissa.crowe@jcu.edu.au)  
32  
33 21

34  
35 22 <sup>1</sup>College of Healthcare Sciences, James Cook University, Townsville QLD 4811, Australia

36  
37 23 <sup>2</sup>College of Medicine and Dentistry, James Cook University, Townsville QLD 4814, Australia

38  
39 24 <sup>3</sup>College of Public Health, Medical and Veterinary Sciences, James Cook University,  
40 25 Townsville QLD 4811, Australia

41  
42 26 <sup>4</sup>Division of Tropical Health and Medicine, James Cook University, Townsville QLD 4811,  
43 27 Australia  
44  
45 28

46  
47 29 **\*Corresponding author:**

48  
49 30 Faith O. Alele, College of Healthcare Sciences, James Cook University, Townsville QLD 4811,  
50 31 Australia, Townsville QLD 4811, Australia

51  
52 32 Tel: +617 47815082

53  
54 33 Email: [faith.alele@my.jcu.edu.au](mailto:faith.alele@my.jcu.edu.au)

55  
56 34 Word count: 3993  
57  
58 35  
59  
60

1  
2  
3 **Abstract**  
4  
5

6 **Objectives:** The aim of this review was to describe the epidemiology of all heat related  
7  
8 illnesses in women compared to men in the armed forces and to identify gender specific risk  
9  
10 factors and differences in heat tolerance.  
11  
12

13  
14 **Design:** A systematic review of multiple databases (MEDLINE, Emtree, CINAHL,  
15  
16 PsycINFO, Informit, and Scopus) was conducted from inception of the databases to 1 April  
17  
18 2019 using the preferred reporting items for systematic review and meta-analysis (PRISMA)  
19  
20 guidelines.  
21  
22

23  
24 **Eligibility criteria:** All relevant studies investigating and comparing heat illness and heat  
25  
26 tolerance in women and men in the armed forces were included in the review.  
27  
28

29 **Results:**  
30

31  
32 Twenty-four (24) studies were included in the systematic review. The incidence of heat stroke  
33  
34 in women ranged from 0.10 to 0.26 per 1000 person years, while the incidence of heat stroke  
35  
36 ranged from 0.22 to 0.48 per 1000 person years in males. The incidence of other heat illnesses  
37  
38 in women compared to men ranged from 1.30 to 2.89 per 1000 person years vs 0.98 to 1.98 per  
39  
40 1000 person years. The limited evidence suggests that women had a greater risk of exertional  
41  
42 heat illness compared to men. Other gender specific risk factors were slower run times and  
43  
44 body mass index. Although there was a higher proportion of women who were heat intolerant  
45  
46 compared to men; this finding needs to be interpreted with caution due to the limited evidence.  
47  
48  
49

50  
51 **Conclusion:** In relation to armed forces personnel, the findings of this review suggest that men  
52  
53 experienced a higher incidence of heat stroke than women. Although the evidence is limited, a  
54  
55 higher proportion of women were heat intolerant and had a greater risk of exertional heat  
56  
57  
58  
59  
60



1  
2  
3 58 illnesses. Despite the limited evidence, further research is required to investigate the influence  
4  
5 59 of gender differences on heat intolerance and heat illness.  
6  
7

## 8 **Article summary**

### 9 **Strengths and limitations of this study**

- 10  
11  
12  
13  
14  
15 62 • This is the first known systematic review investigating the impact of gender on  
16  
17 63 exertional heat illness and heat tolerance in the armed forces.  
18  
19 64 • We conducted a comprehensive search and identified potential risk factors that are  
20  
21 65 associated with exertional heat illness.  
22  
23  
24 66 • Most of the included studies utilized retrospective data with an increased likelihood of  
25  
26 67 misclassification bias which may have underestimated or overestimated the association  
27  
28 68 between heat-related illness and risk factors.  
29  
30

31  
32 69 **Trial registration** None  
33

### 34 **Key words**

35  
36  
37 71 Heat stress; Heat stroke; Heat exhaustion; Heat tolerance; Women; Armed Forces  
38  
39  
40  
41  
42  
43  
44  
45  
46  
47  
48  
49  
50  
51  
52  
53  
54  
55  
56  
57  
58  
59  
60

## 79 Introduction

80 Heat illnesses are disorders that arise after prolonged exposure to heat/humidity and/or  
81 increased physical activity.[1] When body temperature rises, conduction, convection, radiation  
82 and evaporation mechanisms help to cool the body and maintain normothermia.[1] However,  
83 heat loss is susceptible to prevailing environmental conditions and type of clothing worn.  
84 Without adequate cooling heat illnesses may occur including exercise-associated muscle  
85 cramps (EAMC), heat syncope, heat exhaustion and heat stroke, a potentially life-threatening  
86 disorder.[1]

87 Heat stroke is a medical emergency.[2] It is characterized by elevated core temperature of 40°C  
88 and above, central nervous system disturbances and multi-organ damage that may result in  
89 death.[2] Heat stroke has been classified as either classic or exertional.[3] Classic heat stroke  
90 is insidious in onset and occurs in vulnerable populations such as young children, the elderly  
91 and patients with chronic diseases.[4] On the other hand, exertional heat stroke occurs more  
92 rapidly and affects apparently healthy, active people such as athletes, factory workers,  
93 construction workers, agricultural workers, firefighters and armed forces personnel.[5] The  
94 workers in these industries often require high levels of physical exertion to perform jobs and  
95 tasks. A combination of rigorous activities and extreme exposure to heat places the workers at  
96 increased risk of heat stroke.[6]

97 Among armed forces personnel, exertional heat illness continues to pose as a significant cause  
98 of morbidity and mortality [7]. Operations and training may involve exposure to high ambient  
99 temperature and high workload which may result in heat illness.[7] Historically, men have  
100 occupied military roles and responsibilities with fewer proportion of women in the armed  
101 forces.[8] However, more women are joining the armed forces globally following the inclusive  
102 approach to recruiting and creation of more roles for women.[9] Women are required to operate

1  
2  
3 103 in austere environments with heat illnesses becoming more frequent.[9] This has raised the  
4  
5 104 question about gender differences in thermoregulation during heat stress.[9] Evidence suggests  
6  
7  
8 105 that women differ from men in thermal responses to heat.[10] This difference may be because  
9  
10 106 women have a lower rate of whole body evaporative heat loss, higher body fat mass, body mass  
11  
12 107 ratio,[11] number of sweat glands and lower aerobic fitness.[12] In addition, hormonal  
13  
14 108 variations due to menstrual cyclic patterns and the use of contraceptive pills may be associated  
15  
16  
17 109 with the differences in response to heat stress.[13]

18  
19  
20 110 When exertional heat illness occurs, it may be challenging to determine if an individual may  
21  
22 111 return to duty. An inaccurate determination of complete recovery among armed forces  
23  
24 112 personnel may negatively impact military readiness.[14] While, there are no evidence-based  
25  
26  
27 113 recommendations for return to duty, the American College of Sports Medicine (ACSM)  
28  
29 114 guidelines states that exertional heat stroke patients may return to duty after re-establishing  
30  
31 115 heat tolerance.[15] Individuals vary in their ability to cope with heat stress and the inability to  
32  
33 116 withstand heat stress during exertion in hot environments is defined as heat intolerance.[2]  
34  
35  
36 117 Evidence suggests that heat intolerance may be as a direct result of heat stroke or due to  
37  
38 118 predisposing inherent factors (genetics).[2] However, the objective criteria or measure for  
39  
40  
41 119 defining heat tolerance or intolerance remains a subject of controversy.[14] The current return  
42  
43 120 to duty guidelines for military personnel varies across countries.[16] For example, in the United  
44  
45 121 States, military return to duty process is based on clinical assessments with gradual  
46  
47 122 acclimatization and re-introduction of duties.[17] By contrast, return to duty in the Israeli  
48  
49  
50 123 Defence Force requires a heat tolerance test to determine if an individual is heat tolerant.[18]  
51  
52 124 Therefore, it is important to develop evidence based return to duty protocols across the globe.  
53  
54  
55 125 The Israeli Defence Force originally developed the heat tolerance test in 1979 as an index of  
56  
57 126 the ability of soldiers to cope with exertional heat.[18] Individuals who have suffered heat  
58  
59  
60 127 stroke are sent for a heat tolerance test after a minimum recovery period of 6 to 8 weeks as part

1  
2  
3 128 of the return to duty process.[18] Criteria used to define heat intolerance include an elevation  
4  
5 129 in rectal temperature above 38.5°C and heart rate above 150 bpm or when rectal temperature  
6  
7 130 or heart rate fail to stabilize during the test. The heat tolerance test criteria are based on previous  
8  
9 131 studies by Shapiro et al.[19] which utilised only male military participants.[18, 19] While the  
10  
11 132 test may be considered as a useful tool to determine return to duty and to prevent subsequent  
12  
13 133 exertional heat stroke, [18,19] there is no consensus on the validity of the tool as a diagnostic  
14  
15 134 test for heat tolerance.[14] Furthermore, the heat tolerance test does not account for predicting  
16  
17 135 factors such as gender.[14] Given the limitation, questions have been raised about the validity  
18  
19 136 of the protocol in determining return to duty for females in the armed forces. It has been  
20  
21 137 suggested that more research is required to determine whether or not a new protocol should be  
22  
23 138 developed for women.[12]

24  
25  
26  
27  
28  
29 139 As restrictions on gender based-exclusions from military specializations are lifted,[20] it is  
30  
31 140 imperative to understand and evaluate exertional heat illness in women compared to men and  
32  
33 141 identify the gender specific risk factors. Furthermore, it is important to understand how women  
34  
35 142 respond to the heat tolerance test compared to men. According to a recent review on the risk  
36  
37 143 of heat illness in women compared with men in the general population, men are at increased  
38  
39 144 risk of heat illness compared to women.[21] However, no previous review has investigated the  
40  
41 145 epidemiology and risk factors of heat illness as well as gender responses to the heat tolerance  
42  
43 146 test in men and women in the armed forces. Given that, heat illness can impact defence  
44  
45 147 operational effectiveness and may result in acute loss of manpower and possible medical  
46  
47 148 discharge from service,[22] it is essential that the review should be conducted to inform  
48  
49 149 policies.

50  
51  
52  
53  
54  
55 150 Therefore, the objective of this systematic review was to provide a comprehensive summary of  
56  
57 151 the epidemiology of heat illness and heat intolerance in women and men in the armed forces.  
58  
59  
60

1  
2  
3 152 Specific aims were  
4  
5

6 153 To determine the incidence and prevalence of heat illness in women compared to men  
7  
8 154 in the armed forces:  
9

10  
11 155 To identify gender differences in heat tolerance in the armed forces and  
12

13  
14 156 To identify gender specific predisposing risk factors associated with heat illness in the  
15  
16 157 armed forces  
17

18  
19 158  
20  
21

## 22 159 **Methods**

### 23 160 **Search Strategy**

24  
25  
26 161 This review utilised the Preferred Reporting Items for Systematic Review and Meta-analysis  
27  
28 162 (PRISMA) guidelines [23] to explore all literature published in English from inception of the  
29  
30 163 different databases to 1 April 2019. Databases searched were MEDLINE, CINAHL,  
31  
32 164 PsycINFO, Emcare, Informit and Scopus. A preliminary search was conducted in Medline,  
33  
34 165 Emcare and CINAHL to identify relevant key words contained in the titles, abstracts and  
35  
36 166 subject descriptors. These search terms were used to conduct the search in other databases  
37  
38 167 without subject headings. The search strategy used in Medline is presented in supplemental  
39  
40 168 Table 1. No review protocol exists.  
41  
42  
43  
44  
45  
46  
47

### 48 169 **Eligibility criteria**

49  
50  
51 170 Studies included in the review were assessed according to the following inclusion criteria: Peer-  
52  
53 171 reviewed literature comparing heat illness in women to men in the armed forces or reporting  
54  
55 172 heat tolerance in women and men of the armed forces. Exclusions included literature discussing  
56  
57 173 heat illness in other occupations, or studies where data on heat illness in women could not be  
58  
59  
60

1  
2  
3 174 separated from men or studies reporting heat illness in men or literature reviews, conference  
4  
5 175 abstracts and grey literature. In addition, additional primary data sources were identified from  
6  
7  
8 176 the reference lists of the included studies using a hand-search technique (Figure 1).  
9

### 10 11 177 **Selection of studies and data extraction**

12  
13  
14 178 FA and BMA identified all included studies and data extraction was performed using a standard  
15  
16 179 abstraction form. Data extracted from the studies included: study location and design,  
17  
18 180 population, proportion and incidence of heat illnesses, factors associated with heat illness and  
19  
20 181 heat tolerance, and heat tolerance in men and women. All authors cross-checked the extracted  
21  
22  
23 182 data for consistency.  
24  
25

### 26 183 **Quality assessment**

27  
28  
29 184 The methodological quality assessment was assessed by FA in consultation with MC using the  
30  
31 185 modified quality assessment tool for studies with diverse designs (QATSDD) critical appraisal  
32  
33 186 tool.[24] Any disagreement about any article was reviewed by BMA and AMA and discussed  
34  
35 187 until consensus was reached. The QATSDD tool is a 16-item tool which assesses the quality  
36  
37 188 of diverse studies (both quantitative and qualitative).[24] The tool was modified to exclude two  
38  
39 189 items relating to qualitative studies as well as two items relating to quantitative studies that  
40  
41 190 were not applicable to the studies included in the review. The items excluded comprised  
42  
43 191 statistical assessment of reliability and validity of measurement tool(s) (Quantitative only), fit  
44  
45 192 between stated research question and format and content of data collection tool e.g. interview  
46  
47 193 schedule (Qualitative), assessment of reliability of analytical process (Qualitative only) and  
48  
49 194 evidence of user involvement in design. Each criterion in the modified QATSDD tool was  
50  
51 195 awarded a score of 0 to 3 with 0 = not at all, 1 = very slightly, 2 = moderately and 3 = complete.  
52  
53 196 The scores of each criterion were summed to assess the methodological quality of included  
54  
55 197 studies with a maximum score of 36. The criteria included were (1) theoretical framework; (2)  
56  
57  
58  
59  
60

1  
2  
3 198 statement of aims/objectives; (3) description of research setting; (4) evidence of sample size;  
4  
5 199 (5) representative sample of target group of a reasonable size, (6) description of procedure for  
6  
7 200 data collection; (7) rationale for choice of data collection tool(s); (8) detailed recruitment data;  
8  
9  
10 201 (9) fit between research question and method of data collection (Quantitative only); (10) fit  
11  
12 202 between research question and method of analysis (Quantitative only); (11) good justification  
13  
14 203 for analytical method selected; and (12) strengths and limitations. For ease of interpretation,  
15  
16 204 the scores were converted to percentages and classified as low (<50%), medium (50-80%) or  
17  
18 205 high (>80%) quality of evidence.  
19  
20  
21

## 22 206 **Patient and public involvement**

23  
24  
25 207 There was no public or patient involvement in this study.  
26  
27

## 28 208 **Data analysis and synthesis**

29  
30  
31 209 In this review, the International Classification of Diseases ICD 9 or ICD 10 diagnosis codes  
32  
33 210 [25, 26] for the effects of heat and light were used to classify heat illnesses. All included studies  
34  
35 211 utilized either the ICD 9 or ICD 10 codes to classify heat illnesses depending on the year of  
36  
37 212 publication. Heat illnesses were categorised as heat stroke and other heat illnesses. Heat stroke  
38  
39 213 was defined using the ICD diagnosis codes 992.0 (ICD 9) and T67.0 (ICD 10). While other  
40  
41 214 heat illnesses were defined as heat exhaustion (992.3-5, T67 3-5) and unspecified effects of  
42  
43 215 heat and light (992.9 and T67.9). In addition, some studies presented findings for all heat illness  
44  
45 216 without categorizing them into heat stroke and other heat illnesses. These findings were  
46  
47 217 presented separately. Incidence rates and proportions were extracted from the data reported in  
48  
49 218 each study and used for the analysis in this review.  
50  
51  
52  
53  
54

55 219

56  
57 220

58  
59 221  
60

## 222 **Results**

223 An initial search identified 3816 papers. After removing duplicates, screening titles and  
224 abstracts, 47 papers remained for full text review with twenty-four (24) included in the  
225 systematic review (Figure 1). Twenty-two (22) of the reviewed articles originated from the  
226 United States of America (USA), while the other two studies were conducted in the United  
227 Kingdom (UK) and Israel respectively (Supplemental Table 2). All included studies were  
228 conducted among armed forces personnel, however, two studies included university staff and  
229 armed forces personnel in the studies.[27, 28] Twenty- one (21) articles examined heat illnesses  
230 and injuries in women and men. Seven (7) of these studies described all heat related illnesses  
231 in men and women,[29-35] while 13 studies included information on heat stroke and other heat  
232 injuries in relation to both genders.[36-48] Four (4) studies identified gender specific risk  
233 factors associated with heat stroke,[31, 34, 35, 49] and three (3) studies compared heat  
234 tolerance in men and women.[12, 27, 28]

### 235 **Incidence of heat stroke in women compared to men in the armed forces**

236 Thirteen studies conducted among US army personnel compared the incidence of heat stroke  
237 between men and women.[36 – 48] The incidence of heat stroke among females ranged from  
238 0.10 to 0.26 per 1000 person years. Among males, the incidence of heat stroke ranged from  
239 0.22 to 0.48 per 1000 person years (Figure 2). Between 2015 and 2018, the incidence of heat  
240 stroke increased steadily for both men and women.

### 241 **Incidence of other heat illnesses in women compared to men in the armed forces**

242 The incidence of other heat illnesses was reported by 13 studies conducted by the US Army.  
243 The incidence of other heat illnesses in women ranged from 1.30 to 2.89 per 1000 person years.  
244 In men, the incidence rate of other heat illness ranged from 0.98 to 1.98 per 1000 person years  
245 (Figure 3).



1  
2  
3 **246 Incidence and prevalence of all heat illnesses in women compared to men**  
4  
5

6 247 Table 1 shows the proportions and incidences of all heat-related illness in men and women in  
7  
8 248 the armed forces. Five (5) studies reported higher incidences and proportions of all heat illness  
9  
10 249 in men compared to women[29, 31, 32, 34, 35] while two studies reported higher incidences  
11  
12  
13 250 of all heat illness in women.[30, 33]  
14  
15  
16  
17  
18  
19  
20  
21  
22  
23  
24  
25  
26  
27  
28  
29  
30  
31  
32  
33  
34  
35  
36  
37  
38  
39  
40  
41  
42  
43  
44  
45  
46  
47  
48  
49  
50  
51  
52  
53  
54  
55  
56  
57  
58  
59  
60

For peer review only

251 **Table 1: Incidence and Proportion of all heat related illnesses in women and men in the Armed Force**

| Reference, year                              | Country | Study design               | Study duration         | Population                                                                        | ICD codes               | All heat injuries |        |
|----------------------------------------------|---------|----------------------------|------------------------|-----------------------------------------------------------------------------------|-------------------------|-------------------|--------|
|                                              |         |                            |                        |                                                                                   |                         | Women             | Men    |
| Dickson. 1994[29]                            | UK      | Descriptive epidemiology   | 1981-1991 (10yrs)      | Royal Air force, Royal Navy and Army (1448 cases)                                 | ICD-9-CM: 992.0 – 992.9 | 11.43*            | 41.87* |
| Army Medical Surveillance Activity, 1998[30] | USA     | Descriptive epidemiology   | 1997 – 1998 (1 year)   | US Army (1433 cases) 1997                                                         | ICD-9-CM: 992.0 – 992.9 | 12.8†             | 8.6†   |
|                                              |         |                            |                        |                                                                                   |                         | 1998              | 15.8†  |
| Army Medical Surveillance Activity, 2000[33] | USA     | Descriptive epidemiology   | 1997 – 1999 (2 years)  | US Army and Marine Corps (3386 cases) Army (1896 cases) Marine Corps (1104 cases) | ICD-9-CM: 992.0 – 992.9 | 2.0†              | 1.5†   |
|                                              |         |                            |                        |                                                                                   |                         | 4.4†              | 2.0†   |
| Army Medical Surveillance Activity, 2002[31] | USA     | Descriptive epidemiology   | 1990 – 1997 (7 years)  | US Army (2290 cases)                                                              | ICD-9-CM: 992.0 – 992.9 | 14.0%§            | 86.0%§ |
|                                              |         | Case control               | 1998 – 2001 (3 years)  | US Army (5021 cases and 10,042 controls)                                          |                         | 20.7%§            | 79.3%§ |
| Army Medical Surveillance Activity, 2003[32] | USA     | Descriptive epidemiology   | 2002 (1 year)          | US Army (1816 cases)                                                              | ICD-9-CM: 992.0 – 992.9 | 3.5†              | 5.1†   |
| Carter et al, 2005[34]                       | USA     | Cross-sectional            | 1980 – 2002 (22 years) | US Army (5246 cases)                                                              | ICD-9-CM: 992.0 – 992.9 | 13.7%§            | 86.3%§ |
| Bedno et al, 2014[35]                        | USA     | Analytical cross-sectional | 2005 - 2006            | US Armed Forces (80 exertional heat illness cases) 9455 men 1913 women            | ICD-9-CM: 992.0 – 992.9 | 0.680%            | 0.71%  |

252 § Proportions and incidences reported are of the total cases reported in the articles  
 253 \* Incidence rate reported per 100,000 person-years; † Incidence rate per 100,000 person- months; ‡ Incidence rate reported per 1000 person-years  
 254 UK = United Kingdom; USA = United States of America

## 255 Gender specific risk factors for heat illness

256 Three (3) studies identified the gender specific risk factors that were associated with heat illness  
 257 (Table 2). [31, 34, 49] Two of the studies compared the risk of heat illness between males and  
 258 females while one study identified risk factors within each gender. In the two studies that  
 259 compared the risk of heat illness by gender, females had a greater risk of experiencing heat  
 260 illness (OR 1.5, 95% CI 1.4 to 1.7 and IDR 1.21, 95% CI 1.09 to 1.40) compared to males.[31,  
 261 34] Within gender, males with body mass index (BMI) of  $\geq 26 \text{ kgm}^{-2}$  had a greater risk of  
 262 experiencing heat illness compared to males with BMI  $< 22 \text{ kgm}^{-2}$  (OR 2.10, 95% CI 1.59 to  
 263 2.78).[49] In addition, males with run times of  $\geq 12.9$  minutes had almost six times the risk of  
 264 exertional heat illness compared to males with run times of  $< 10.3$  minutes (OR 5.61, 95% CI  
 265 1.92 to 6.85). While females with run times of  $\geq 6.9$  minutes had five times the risk of  
 266 exertional heat illness compared to females with run times of  $< 5.8$  minutes (OR 5.30, 95% CI  
 267 1.59 to 17.64).[49]

268 **Table 2: Gender specific risk factors associated with heat illness**

| Reference, year                              | Country | Study design and duration                    | Study population                                                                                  | Risk factors                                                                                                                | OR or IDR (95% CI)                                              |
|----------------------------------------------|---------|----------------------------------------------|---------------------------------------------------------------------------------------------------|-----------------------------------------------------------------------------------------------------------------------------|-----------------------------------------------------------------|
| Army Medical Surveillance Activity, 2002[31] | USA     | Case-control<br>1998 – 2001<br>(3 years)     | US Army<br>5021 cases and 10,042<br>controls                                                      | Female                                                                                                                      | 1.5 (1.4 - 1.7)                                                 |
| Carter et al, 2005[34]                       | USA     | Cross-sectional<br>1980 – 2002<br>(22 years) | US Army<br>5246 cases of heat illness;<br>4521 males and 725<br>females                           | Female                                                                                                                      | 1.21 (1.09 – 1.40)                                              |
| Wallace et al, 2006[49]                      | USA     | Case-control<br>1988 – 1996<br>(8 years)     | US Marine Corps<br>Male (627 cases and 1679<br>controls)<br>Female (49 cases and 123<br>controls) | BMI $\geq 26 \text{ kg/m}^2$ (males)<br>Run time $\geq 12.9$<br>minutes (males)<br>Run time $\geq 6.9$ minutes<br>(females) | 2.10 (1.59 – 2.78)<br>5.61 (3.73 – 8.45)<br>5.30 (1.59 – 17.64) |

269 Odds ratio; IDR = Incidence density ratio; BMI= Body Mass Index; CI=Confidence Interval; USA = United States of America

270 **Heat tolerance in women and men**

271 Three studies compared heat tolerance classification in males and females using the HTT  
 272 developed by the Israeli Defence Force (Table 3). [12, 27, 28] Druyan et al. investigated gender  
 273 differences in Israeli Defence Force personnel who had sustained heat injury. The study  
 274 reported that 67% of the women were found to be heat intolerant compared to 26% of their  
 275 male counterparts.[12] In the studies conducted by Lisman et al. and Kazman et al. the study  
 276 population comprised of participants from the university and military communities who had  
 277 either no heat illness or a previous history of heat illness. Both studies reported that a greater  
 278 proportion of women were classified as heat intolerant compared to men (42% vs 27% and  
 279 45% vs 18% respectively). [27, 28]

280

281 **Table 3: Heat tolerance in women and men**

| Reference, year         | Country | Study design and duration                           | Study population                                                   | Heat in tolerance rate Women | Heat in tolerance rate Men |
|-------------------------|---------|-----------------------------------------------------|--------------------------------------------------------------------|------------------------------|----------------------------|
| Druyan et al, 2012[12]  | Israel  | Retrospective cross-sectional 2008 – 2010 (2 years) | 170 males and 9 females                                            | 66.67%                       | 25.79%                     |
| Lisman et al, 2014 [27] | USA     | Analytical cross-sectional                          | Military and university community members; 34 males and 12 females | 42%                          | 27%                        |
| Kazman et al, 2015[28]  | USA     | Analytical cross-sectional (duration not stated)    | Military and university community members; 55 males and 20 females | 45%                          | 18%                        |

282 USA = United States of America

283

284

285

286

1  
2  
3 287 **Assessment of methodological quality**  
4  
5

6 288 The QATSDD scores ranged from 22.2% to 94.4% (Supplemental Table 3). Only six studies  
7  
8 289 scored above 50% and included details about recruitment, data analysis, strengths and  
9  
10 290 limitations of the research. The other studies had lower scores because they lacked detailed  
11  
12 291 justification for the analytical methods, data collection, analysis, strengths and limitations.  
13  
14 292 However, results of the methodological assessment should be interpreted with caution.  
15  
16 293 Although the tool assesses methodological quality, it is more likely to be dependent on how  
17  
18 294 the paper was written. In this review, 70% of the studies included were military reports on heat-  
19  
20 295 related illnesses in the Armed Forces. These reports were published in a peer-reviewed journal  
21  
22 296 and were retrospective analyses of data collected by Defence Medical Surveillance Systems.  
23  
24 297 These studies may not have reported details about data collection, strengths and limitations,  
25  
26 298 but they presented valid information on heat-related illness.  
27  
28  
29  
30  
31  
32  
33  
34  
35  
36  
37  
38  
39  
40  
41  
42  
43  
44  
45  
46  
47  
48  
49  
50  
51  
52  
53  
54  
55  
56  
57  
58  
59  
60

## 308 **Discussion**

309 The findings of this systematic review suggest that men have a slightly higher incidence of heat  
310 stroke compared to women. By contrast women report a slightly higher incidence of other heat  
311 illness compared to men. In addition, among studies that reported all heat illnesses (where heat  
312 stroke and other heat illnesses have been combined) there was a higher rate of all heat illnesses  
313 in men compared to women as evidenced by the outcomes reported in five (5) of seven (7)  
314 studies. However, women had a greater risk of experiencing exertional heat illness and were  
315 more likely to be heat intolerant compared to men. Other gender specific risk factors were  
316 longer run times for both men and women while higher BMI was associated with exertional  
317 heat illness for men only. However, the association between these factors and exertional heat  
318 illness is weak given the small number of articles that investigated the relationship.  
319 Furthermore, despite the higher proportion of heat intolerance reported among women; this  
320 finding should be interpreted with caution given the small sample size for females in the  
321 included studies and the differences in occupations of the women in the three studies. One  
322 study included women in the armed forces with a previous history of heat stroke, [12] while  
323 the other two studies recruited women from the general population as well as military members  
324 with either no history or a previous history of heat stroke. [27, 28]

### 325 **Incidence and prevalence of exertional heat illnesses in women compared to men**

326 In this review, women had a lower incidence of heat stroke, but a slightly higher incidence of  
327 other heat illness compared to men. The reported lower incidence of heat stroke/higher  
328 incidence of other heat illness in women compared to men could possibly be due to the fact  
329 that women in the military in the United States were excluded from combat positions until 2013  
330 when the ban was lifted.[20] Evidence in the literature suggests that service members who were  
331 engaged in roles such as infantry or gun crew had an increased risk of heat illness, possibly

1  
2  
3 332 reflecting a greater risk of heat illness for those in combat roles.[34] Furthermore, during  
4  
5 333 military training exercises men may have comparatively tolerated working in the heat beyond  
6  
7 334 the endurance limits.[22] This finding was re-echoed in a previous systematic review that men  
8  
9 335 in the general population had a higher rate of all types of heat illnesses compared to women.[21]  
10  
11 336 Although, the incidence of heat stroke was lower in women compared to men in this review,  
12  
13 337 the incidence of heat stroke among women has increased over the past four years. This implies  
14  
15 338 that as more women engage in specialised military roles their risk of exertional heat illness  
16  
17 339 increases.  
18  
19  
20  
21

### 22 340 **Gender specific risk factors for heat illness**

23  
24  
25 341 Despite the lower incidence of heat stroke, women had a greater risk of exertional heat illnesses  
26  
27 342 compared to men.[30, 33] In addition one study attempted to investigate intra gender risk  
28  
29 343 factors for exertional heat illness.[49] Slower run time duration was associated with exertional  
30  
31 344 heat illness among males and females respectively, while higher BMI was identified as a risk  
32  
33 345 factor among males only.[49] The higher risk of exertional heat illnesses in women may likely  
34  
35 346 be due to differences in physiological and physical characteristics between men and  
36  
37 347 women.[50] Physiological characteristics such as hormones, use of contraceptive pills and  
38  
39 348 lower evaporative heat loss may make women more susceptible to heat illness. [11, 13]  
40  
41 349 However, conflicting evidence suggests that in highly trained women, exercise performance  
42  
43 350 and heat loss is not affected by the menstrual cycle phase but is impaired in humid  
44  
45 351 conditions.[51] In addition, physical characteristics such as lower aerobic fitness is a predictor  
46  
47 352 of exertional heat illness.[50] Generally, women have lower aerobic fitness levels and lower  
48  
49 353 overall work capacity which may contribute to the increased risk of exertional heat illness.[50]  
50  
51 354 Individuals with low aerobic fitness levels are likely to exert themselves beyond their physical  
52  
53 355 limit and are at increased risk of heat illness.[52] Other intra gender risk factors that were  
54  
55 356 identified were longer run time duration and higher BMI.[49] Evidence suggests that slower  
56  
57  
58  
59  
60

1  
2  
3 357 run time duration which may be a reflection of lower aerobic fitness and higher BMI increases  
4  
5 358 the risk of heat illness.[49, 53] However, the evidence is limited given that this was reported  
6  
7  
8 359 by only one study.[49]  
9

### 10 360 **Heat tolerance in women and men**

11  
12  
13  
14 361 The risk of heat illness is dependent on thermal tolerance.[2] In order to determine the recovery  
15  
16 362 and return to duty for HTT is conducted for members of the armed forces after a heat stroke  
17  
18 363 event.[18] The test criteria defines heat intolerance as peak rectal temperature > 38.5°C, peak  
19  
20 364 heart rate > 150 bpm, or the inability of these values to reach a plateau.[18, 19] Although in  
21  
22  
23 365 the three studies, a higher proportion of women were classified as heat intolerant; this evidence  
24  
25 366 should be interpreted with caution given that the female populations included in each study  
26  
27 367 varied with respect to heat illness and occupations.[12, 27, 28] However, the studies  
28  
29 368 acknowledged that gender differences in cardiorespiratory fitness, body fat percentage and  
30  
31 369 surface area to mass ratio may account for the higher intolerance rates in women.[12, 27, 28] In  
32  
33  
34 370 addition,, the three studies reported using the Israeli Defence Force heat tolerance test protocol  
35  
36  
37 371 and given that the test protocol was developed using male participants, there may be a need to  
38  
39 372 re-evaluate the criteria for women to reduce false positive results.[12, 27, 28] Furthermore,  
40  
41 373 incomplete recovery and inaccurate determination of return to duty may negatively affect  
42  
43 374 military operations and may end the careers of armed forces personnel.[14] Therefore, it is  
44  
45 375 important to ensure that the heat tolerance test is valid and fair for females, if it is to be used to  
46  
47  
48 376 determine return to duty for females in the armed forces.  
49

### 50 51 377 **Strengths and limitations**

52  
53  
54 378 To the authors' current knowledge, this is the first known systematic review investigating  
55  
56 379 gender differences in exertional heat illness and heat tolerance in the armed forces. In addition,  
57  
58  
59 380 we identified potential gender specific risk factors that are associated with exertional heat  
60



1  
2  
3 381 illness. However, the heterogeneity in the study designs contributed to the variable  
4  
5 382 methodological quality of the included studies. Most of the articles in this review were military  
6  
7 383 reports and may not be considered of high methodological quality when assessed using a formal  
8  
9 384 critical appraisal tool. In addition, most of the included studies utilized retrospective data as  
10  
11 385 the data source with an increased likelihood of incompleteness and inaccuracy. There is a  
12  
13 386 likelihood that misclassification bias could have been introduced into the studies. Three studies  
14  
15 387 that explored the risk factors associated with heat-related illness used retrospective data. [31,  
16  
17 388 34, 49] The retrospective data may have been misclassified or incomplete at the time of entry  
18  
19 389 and may have introduced misclassification bias into the studies. This type of bias may  
20  
21 390 underestimate or overestimate the association between heat-related illness and risk factors.  
22  
23 391 Although the gender specific risk factors associated with heat illness were discussed; the review  
24  
25 392 provided limited evidence of these factors, given the few numbers of studies that investigated  
26  
27 393 the association. Furthermore, we included only studies published in English language; studies  
28  
29 394 published in other languages were excluded.  
30  
31  
32  
33  
34  
35

### 36 395 **Implication for policy and future research**

37  
38  
39 396 This systematic review demonstrates that there is limited research on exertional heat illness in  
40  
41 397 women in the armed forces. Although men had a higher incidence of heat stroke; women had  
42  
43 398 a higher incidence of other heat illnesses. Further research is needed to establish if this reflects  
44  
45 399 physiological or behavioural differences. In addition, the limited and inconclusive evidence  
46  
47 400 suggests that more women were classified as heat intolerant compared to men using the Israeli  
48  
49 401 Defence Force heat tolerance test protocol. The current criteria may be unfair to women given  
50  
51 402 that it was developed using male participants. More research is needed to determine the gender  
52  
53 403 differences in heat tolerance as well as to consider re-evaluating the heat tolerance test protocol  
54  
55 404 or the development of a new protocol that considers gender specific factors.[12] Given that the  
56  
57  
58  
59  
60

1  
2  
3 405 heat tolerance test was conducted in a laboratory setting, more research is needed to replicate  
4  
5 406 the findings in field based setting.  
6  
7

## 8 407 **Conclusion**

9  
10  
11 408 In conclusion, this review shows that men had a higher incidence of heat stroke but women in  
12  
13 409 the armed forces had a greater risk of exertional heat illness. Despite the limited evidence,  
14  
15 410 further research is required to investigate the influence of gender differences on heat tolerance  
16  
17 411 and heat illness. Further research is needed to evaluate the heat tolerance test protocol for  
18  
19 412 women.  
20  
21  
22  
23

24 413

## 25 26 27 414 **Authors' contribution**

28  
29 415 All authors contributed substantially to the study concept, design, data extraction, quality  
30  
31 416 assessment and writing of the manuscript.

32 417 **Conceptualization:** Faith O. Alele, Bunmi S. Malau-Aduli, Aduli E. Malau-Aduli, Melissa  
33  
34 418 Crowe

35 419 **Methodology:** Faith O. Alele, Bunmi S. Malau-Aduli, Aduli E. Malau-Aduli, Melissa Crowe

36  
37 420 **Writing** - Original draft: Faith O. Alele

38  
39 421 **Writing – review & editing:** Faith O. Alele, Bunmi S. Malau-Aduli, Aduli E. Malau-Aduli,  
40  
41 422 Melissa Crowe

42 423 All authors read and approved the manuscript for submission.

43  
44 424 **Funding:** The first author (FA) is supported by the Australian Government International  
45  
46 425 Research Training Program Scholarship

47 426 **Competing Interests:** The authors declare that they have no competing interests.

48  
49 427 **Patient consent for publication:** Not required

50  
51 428 **Data sharing statement:** There are no additional or unpublished data available.  
52

53 429

54  
55 430

56  
57 431

58  
59 432  
60

433 **References**

- 434 1. Becker JA, Stewart LK. Heat-related illness. *Am Fam Phys* 2011;83(11):1325-  
435 1330.
- 436 2. Epstein Y. Heat intolerance: Predisposing factor or residual injury? *Med Sci Sports*  
437 *Exerc* 1990;22(1):29-35.
- 438 3. Grubenhoff JA, du Ford K, Roosevelt GE. Heat-related illness. *Clin Pediatr Emerg*  
439 *Med* 2007;8(1):59-64.
- 440 4. Mehta SR, Jaswal DS. Heat Stroke. *Med J Armed Forces India* 2003;59(2):140-3.
- 441 5. Xiang J, Peng B, Pisaniello D, Hansen A. Health impacts of workplace heat  
442 exposure: an epidemiological review. *Ind Health* 2014;52(2):91-101.
- 443 6. Xiang J, Hansen A, Pisaniello D, Bi P. Extreme heat and occupational heat illnesses  
444 in South Australia, 2001–2010. *Occup Environ Med* 2015; 72:580-586  
445 doi:10.1136/oemed-2014-102706 [published Online First 18 June 2015].
- 446 7. Epstein Y, Druyan A, Heled Y. Heat injury prevention—a military perspective. *The*  
447 *J Strength Cond Res* 2012; 26:82-6.
- 448 8. McCristall P, Baggaley K. The progressions of a gendered military: A theoretical  
449 examination of gender inequality in the Canadian military. *J Mil Veteran Fam*  
450 *Health*. 2019;5(1):119-26.
- 451 9. Kazman JB, Heled Y, Lisman PJ, Druyan A, Deuster PA, O'Connor FG. Exertional  
452 Heat Illness: The Role of Heat Tolerance Testing. *Curr Sports Med Rep*  
453 2013;12(2):101-5.
- 454 10. Kenney WL. A review of comparative responses of men and women to heat stress.  
455 *Environ Res* 1985;37(1):1-11.
- 456 11. Shapiro Y, Pandolf KB, Avellini BA, Pimental NA, Goldman RF. Physiological  
457 responses of men and women to humid and dry heat. *J Appl Physiol* 1980;49(1):1-  
458 8.
- 459 12. Druyan A, Makranz C, Moran D, Yanovich R, Epstein Y, Heled Y. Heat tolerance  
460 in women-Reconsidering the criteria. *Aviat Space Environ Med* 2012;83(1):58-60.
- 461 13. Tenaglia SA, McLellan TM, Klentrou PP. Influence of menstrual cycle and oral  
462 contraceptives on tolerance to uncompensable heat stress. *Eur J Appl Physiol Occup*  
463 *Physiol* 1999;80(2):76-83.
- 464 14. O'Connor FG, Heled Y, Deuster PA. Exertional heat stroke, the return to play  
465 decision, and the role of heat tolerance testing: a clinician's dilemma. *Curr Sport*  
466 *Med Rep*. 2018;17(7):244-8.
- 467 15. O'Connor FG, Casa DJ, Bergeron MF, Carter III R, Deuster P, Heled Y, Kark J,  
468 Leon L, MCDermott B, O'Brien K, Roberts WO. American College of Sports  
469 Medicine Roundtable on exertional heat stroke-return to duty/return to play:  
470 conference proceedings. *Curr Sport Med Rep*. 2010;9(5):314-21.
- 471 16. McDermott BP, Casa DJ, Yeargin SW, Ganio MS, Armstrong LE, Maresh CM.  
472 Recovery and return to activity following exertional heat stroke: considerations for  
473 the sports medicine staff. *J Sport Rehabil*. 2007;16(3):163-81.
- 474 17. Department of the Army. Standards of Medical Fitness. Army Regulation 40–  
475 501.2019: 30 - 32
- 476 18. Moran DS, Heled Y, Still L, Laor A, Shapiro Y. Assessment of heat tolerance for  
477 post exertional heat stroke individuals. *Med Sci Monit* 2004;10(6):Cr252-7.

- 1  
2  
3 478 19. Shapiro Y, Magazanik A, Udassin R, Ben-Baruch G, Shvartz E, Shoenfeld Y. Heat  
4 479 intolerance in former heatstroke patients. *Ann Intern Med* 1979;90(6):913-6.  
5 480 20. Nindl BC, Jones BH, Van Arsdale SJ, Kelly K, Kraemer WJ. Operational physical  
6 481 performance and fitness in military women: physiological, musculoskeletal injury,  
7 482 and optimized physical training considerations for successfully integrating women  
8 483 into combat-centric military occupations. *Mil Med* 2016;181(suppl\_1):50-62.  
9 484 21. Gifford RM, Todisco T, Stacey M, Fujisawa T, Allerhand M, Woods DR, et al. Risk  
10 485 of heat illness in men and women: A systematic review and meta-analysis. *Environ*  
11 486 *Res* 2019;171:24-35.  
12 487 22. Hunt AP, Billing DC, Patterson MJ, Caldwell JN. Heat strain during military  
13 488 training activities: The dilemma of balancing force protection and operational  
14 489 capability. *Temp* 2016;3(2):307-17.  
15 490 23. Moher D, Liberati A, Tetzlaff J, Altman DG. Preferred reporting items for  
16 491 systematic reviews and meta-analyses: the PRISMA statement. *Ann Intern Med.*  
17 492 2009;151 (4):264-9  
18 493 24. Sirriyeh R, Lawton R, Gardner P, Armitage G. Reviewing studies with diverse  
19 494 designs: the development and evaluation of a new tool. *J Eval Clin Pract*  
20 495 2012;18(4):746-52.  
21 496 25. World Health Organization. International statistical classification of diseases and  
22 497 related health problems. 10th revision version for 2016. 2016 (Accessed August 20,  
23 498 2019). Available at <https://apps.who.int/iris/handle/10665/39473>  
24 499 26. World Health Organization. International statistical classification of diseases and  
25 500 related health problems. 10th revision version for 2016. 2016 (Accessed August 20,  
26 501 2019). Available at <https://icd.who.int/browse10/2016/en>  
27 502 27. Lisman P, Kazman JB, O'Connor FG, Heled Y, Deuster PA. Heat tolerance testing:  
28 503 association between heat intolerance and anthropometric and fitness measurements.  
29 504 *Mil Med.* 2014 Nov 1;179(11):1339-46.  
30 505 28. Kazman JB, Purvis DL, Heled Y, Lisman P, Atias D, Van Arsdale S, et al. Women  
31 506 and exertional heat illness: identification of gender specific risk factors. *US Army*  
32 507 *Med Dep J* 2015:58-66.  
33 508 29. Dickinson JG. Heat illness in the services. *J R Army Med Corps* 1994;140(1):7-12.  
34 509 30. Army Medical Surveillance Activity. Reported heat and cold injuries, United States  
35 510 Army, January 1997 - December 1997. *MSMR* 1998;4(1):16.  
36 511 31. Army Medical Surveillance Activity. Heat-associated injuries, US Army 1991-  
37 512 2002. *MSMR* 2002;8(4):2-7.  
38 513 32. Army Medical Surveillance Activity. Heat-related injuries, US Army, 2002.  
39 514 *MSMR* 2003;9(4):2-4.  
40 515 33. Army Medical Surveillance Activity. Heat-related injuries among active duty  
41 516 soldiers and Marines, 1997-1999. *MSMR* 2000;6(3):2-3.  
42 517 34. Carter Iii R, Chevront SN, Williams JO, Kolka MA, Stephenson LA, Sawka MN,  
43 518 et al. Epidemiology of hospitalizations and deaths from heat illness in soldiers. *Med*  
44 519 *Sci Sports Exerc* 2005;37(8):1338-44.  
45 520 35. Bedno SA, Urban N, Boivin MR, Cowan DN. Fitness, obesity and risk of heat  
46 521 illness among army trainees. *Occup Med (Lond)* 2014;64(6):461-7.  
47 522 36. Army Medical Surveillance Activity. Heat-related injuries, U.S. Army, 2005.  
48 523 *MSMR* 2006;12(5):2-4.  
49  
50  
51  
52  
53  
54  
55  
56  
57  
58  
59  
60

- 1  
2  
3 524 37. Armed Forces Health Surveillance Branch. Heat-related Injuries, U.S. Armed  
4 525 Forces, 2006. *MSMR* 2007;14(2):14-5.  
5 526 38. Armed Forces Health Surveillance Branch. Update: Heat injuries among U.S.  
6 527 military members, 2007. *MSMR* 2008;15(2):2-3.  
7 528 39. Armed Forces Health Surveillance Branch. Update: Heat injuries among active  
8 529 component members, U.S. Armed Forces, 2008. *MSMR* 2009;16(3):8-9.  
9 530 40. Armed Forces Health Surveillance Branch. Update: Heat injuries, active  
10 531 component, U.S. Armed Forces, 2009. *MSMR* 2010;17(3):6-8.  
11 532 41. Armed Forces Health Surveillance Branch. Update: Heat injuries, active  
12 533 component, U.S. Armed Forces, 2010. *MSMR* 2011;18(3):6-8.  
13 534 42. Armed Forces Health Surveillance Branch. Update: Heat injuries, active  
14 535 component, U.S. Armed Forces, 2011. *MSMR* 2012;19(3):13-5.  
15 536 43. Armed Forces Health Surveillance Branch. Update: Heat injuries, active  
16 537 component, U.S. Armed Forces, 2012. *MSMR* 2013;20(3):17-20.  
17 538 44. Armed Forces Health Surveillance Branch. Update: Heat injuries, active  
18 539 component, U.S. Armed Forces, 2013. *MSMR* 2014;21(3):10-3.  
19 540 45. Armed Forces Health Surveillance Branch. Update: Heat injuries, active  
20 541 component, U.S. Armed Forces, 2014. *MSMR* 2015;22(3):17-20.  
21 542 46. Armed Forces Health Surveillance Branch. Update: Heat injuries, active  
22 543 component, U.S. Army, Navy, Air Force, and Marine Corps, 2015. *MSMR*  
23 544 2016;23(3):16-9.  
24 545 47. Armed Forces Health Surveillance Branch. Update: Heat Illness, Active  
25 546 Component, U.S. Armed Forces, 2016. *MSMR* 2017;24(3):9-13.  
26 547 48. Armed Forces Health Surveillance Branch. Update: Heat illness, active component,  
27 548 U.S. Armed Forces, 2017. *MSMR* 2018;25(4):6-12.  
28 549 49. Wallace RF, Kriebel D, Punnett L, Wegman DH, Wenger C, Gardner JW, et al.  
29 550 Risk factors for recruit exertional heat illness by gender and training period. *Aviat*  
30 551 *Space Environ Med* 2006;77(4):415-21.  
31 552 50. Epstein Y, Yanovich R, Moran DS, Heled Y. Physiological employment standards  
32 553 IV: integration of women in combat units physiological and medical considerations.  
33 554 *Eur J Appl Physiol* 2013;113(11):2673-90.  
34 555 51. Lei, Tze-Huan et al. "Influence of menstrual phase and arid vs. humid heat stress  
35 556 on autonomic and behavioural thermoregulation during exercise in trained but  
36 557 unacclimated women. *J Physiol* 2017; 595(9):2823-2837.  
37 558 52. Cleary M. Predisposing risk factors on susceptibility to exertional heat illness:  
38 559 clinical decision-making considerations. *J Sport Rehabil* 2007;16(3):204-14.  
39 560 53. Selkirk GA, McLellan TM. Influence of aerobic fitness and body fatness on  
40 561 tolerance to uncompensable heat stress. *J Appl Physiol* 2001;91(5):2055-63.  
41 562

## 563 Figure legends

564 Figure 1: PRISMA flow chart of the study selection protocol

565 Figure 2: The incidence rate of exertional heat stroke between men and women in the armed  
566 forces from 2006 to 2018

1  
2  
3  
4  
5  
6  
7  
8  
9  
10  
11  
12  
13  
14  
15  
16  
17  
18  
19  
20  
21  
22  
23  
24  
25  
26  
27  
28  
29  
30  
31  
32  
33  
34  
35  
36  
37  
38  
39  
40  
41  
42  
43  
44  
45  
46  
47  
48  
49  
50  
51  
52  
53  
54  
55  
56  
57  
58  
59  
60

567 Figure 3: Incidence rate of other heat illnesses (including heat exhaustion and unspecified  
568 effects of heat and light) between men and women in the armed forces from 2006 to 2018

569  
570  
571

For peer review only

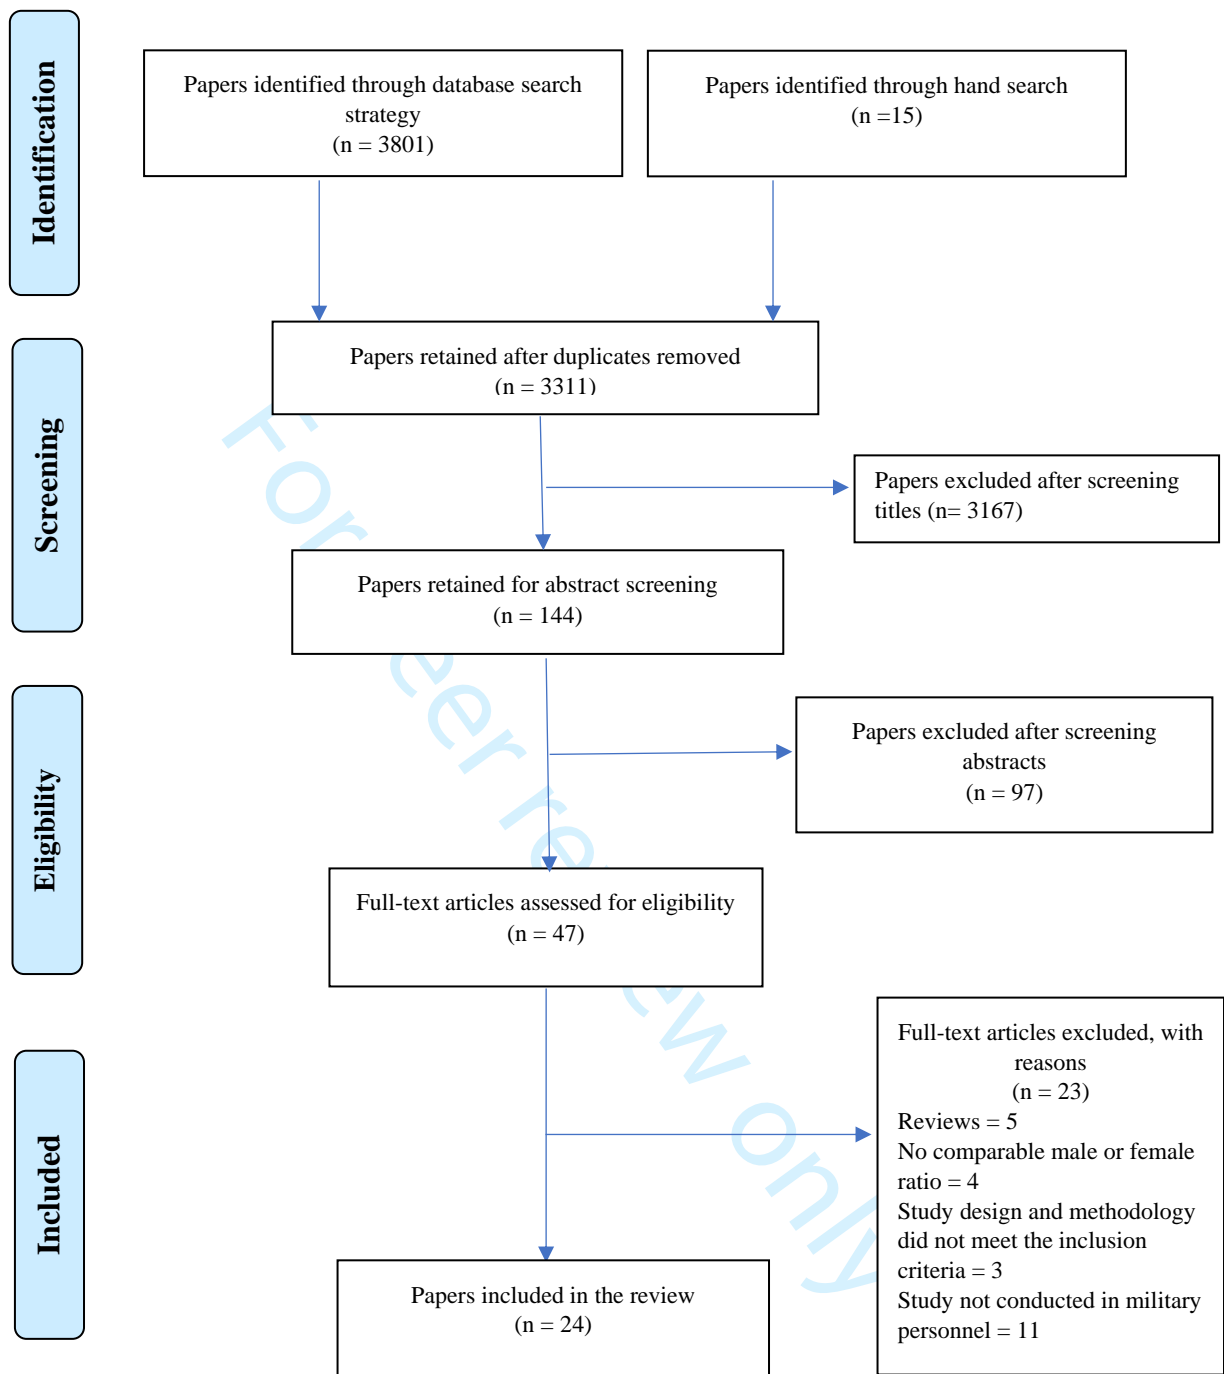

Figure 1: PRISMA flow chart of the study selection protocol

1  
2  
3  
4  
5  
6  
7  
8  
9  
10  
11  
12  
13  
14  
15  
16  
17  
18  
19  
20  
21  
22  
23  
24  
25  
26  
27  
28  
29  
30  
31  
32  
33  
34  
35  
36  
37  
38  
39  
40  
41  
42  
43  
44  
45  
46  
47  
48  
49  
50  
51  
52  
53  
54  
55  
56  
57  
58  
59  
60

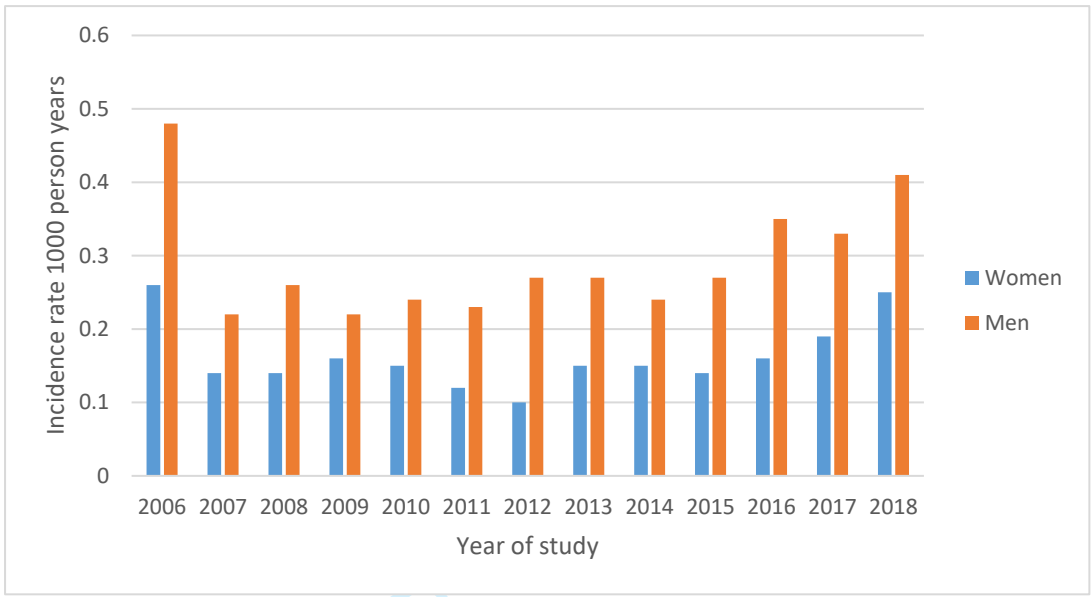

Figure 2

Peer review only



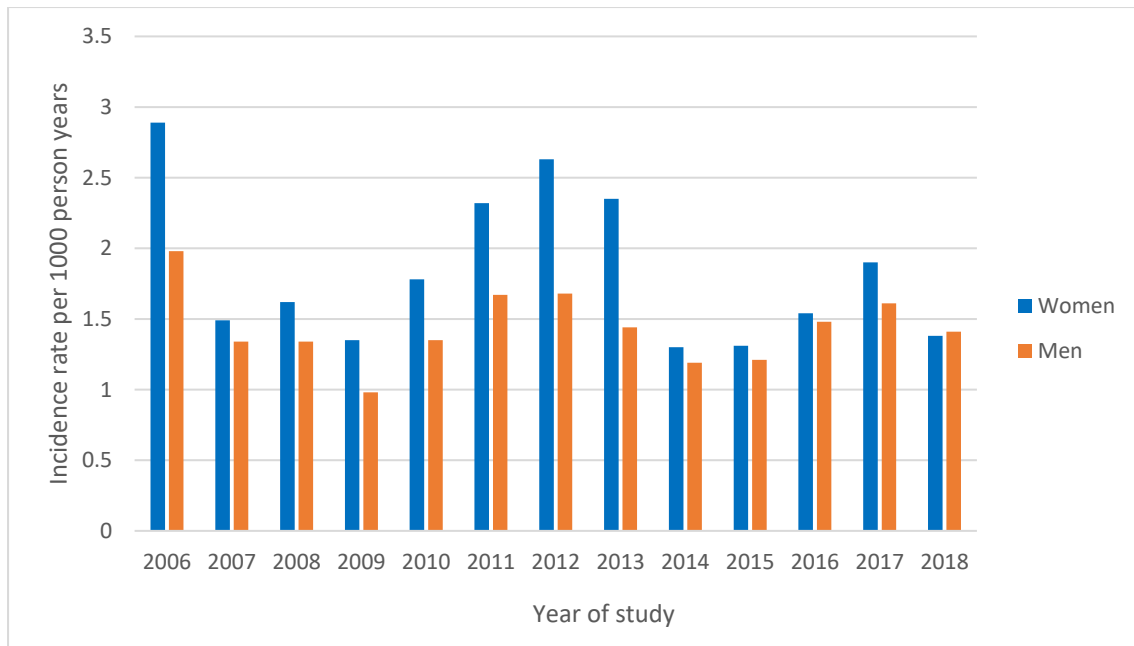

Figure 3

1  
2  
3  
4  
5  
6  
7  
8  
9  
10  
11  
12  
13  
14  
15  
16  
17  
18  
19  
20  
21  
22  
23  
24  
25  
26  
27  
28  
29  
30  
31  
32  
33  
34  
35  
36  
37  
38  
39  
40  
41  
42  
43  
44  
45  
46  
47  
48  
49  
50  
51  
52  
53  
54  
55  
56  
57  
58  
59  
60

## Supplemental Table 1

| Medline search strategy |                                                                                                                                                                                                 |
|-------------------------|-------------------------------------------------------------------------------------------------------------------------------------------------------------------------------------------------|
| 1.                      | Women (MeSH)                                                                                                                                                                                    |
| 2.                      | Gender expression                                                                                                                                                                               |
| 3.                      | Gender identity (MeSH)                                                                                                                                                                          |
| 4.                      | Gender                                                                                                                                                                                          |
| 5.                      | Wom\$                                                                                                                                                                                           |
| 6.                      | Sex                                                                                                                                                                                             |
| 7.                      | Heat strok*                                                                                                                                                                                     |
| 8.                      | Heatstrok*                                                                                                                                                                                      |
| 9.                      | Heat collapse                                                                                                                                                                                   |
| 10.                     | Heat exhaustion                                                                                                                                                                                 |
| 11.                     | Heat prostration                                                                                                                                                                                |
| 12.                     | Heat cramp                                                                                                                                                                                      |
| 13.                     | Heat cramps                                                                                                                                                                                     |
| 14.                     | Heat stress disorder                                                                                                                                                                            |
| 15.                     | Heat stress disorders (MeSH)                                                                                                                                                                    |
| 16.                     | Thermal stress                                                                                                                                                                                  |
| 17.                     | Heat illness                                                                                                                                                                                    |
| 18.                     | Heat illnesses                                                                                                                                                                                  |
| 19.                     | Heat injury                                                                                                                                                                                     |
| 20.                     | Heat injuries                                                                                                                                                                                   |
| 21.                     | Heat related diseases                                                                                                                                                                           |
| 22.                     | Heat disorder                                                                                                                                                                                   |
| 23.                     | Heat disorders                                                                                                                                                                                  |
| 24.                     | Heat related disorder                                                                                                                                                                           |
| 25.                     | Heat related disorders                                                                                                                                                                          |
| 26.                     | Heat related illness                                                                                                                                                                            |
| 27.                     | Heat related illnesses                                                                                                                                                                          |
| 28.                     | Heat related injuries                                                                                                                                                                           |
| 29.                     | Heat related injury                                                                                                                                                                             |
| 30.                     | Environmental heat illness                                                                                                                                                                      |
| 31.                     | Heat stress                                                                                                                                                                                     |
| 32.                     | Heat adaptation                                                                                                                                                                                 |
| 33.                     | Heat tolerance                                                                                                                                                                                  |
| 34.                     | Heat tolerances                                                                                                                                                                                 |
| 35.                     | Heat resistance                                                                                                                                                                                 |
| 36.                     | Thermal resistance                                                                                                                                                                              |
| 37.                     | Thermoresistance                                                                                                                                                                                |
| 38.                     | Thermotolerance (MeSH)                                                                                                                                                                          |
| 39.                     | Heat endurance                                                                                                                                                                                  |
| 40.                     | 1 OR 2 OR 3 OR 4 OR 5 OR 6                                                                                                                                                                      |
| 41.                     | 7 OR 8 OR 9 OR 10 OR 11 OR 12 OR 13 OR 14 OR 15 OR 16 OR 17 OR 18 OR 19 OR 20 OR 21 OR 22 OR 23 OR 24 OR 25 OR 26 OR 27 OR 28 OR 29 OR 30 OR 31 OR 32 OR 33 OR 34 OR 35 OR 36 OR 37 OR 38 OR 39 |
| 42.                     | 40 AND 41                                                                                                                                                                                       |

**Supplemental Table 2**  
**Summary of all included studies**

| Reference, year                              | Country | Study design and duration                                                    | Population                                                                                                                               | Study findings <sup>§</sup>                                                                                                                                                                                             |
|----------------------------------------------|---------|------------------------------------------------------------------------------|------------------------------------------------------------------------------------------------------------------------------------------|-------------------------------------------------------------------------------------------------------------------------------------------------------------------------------------------------------------------------|
| Dickson. G, 1994[29]                         | UK      | Descriptive epidemiology<br>1981-1991                                        | Royal Airforce, Royal Navy and Army;<br>1448 all heat injuries cases <sup>¶</sup>                                                        | <b>Women</b><br>All heat injuries: 11.43 <sup>#</sup><br><b>Men</b><br>All heat injuries: 41.87 <sup>#</sup>                                                                                                            |
| Army Medical Surveillance Activity, 1998[30] | USA     | Descriptive epidemiology;<br>1997 - 1998                                     | US Army;<br>1433 all heat injuries cases (1997-1998) <sup>¶</sup><br>1997<br>1998                                                        | <b>Women</b><br>All heat injuries: 12.8 <sup>‡</sup><br><b>Men</b><br>All heat injuries: 8.6 <sup>‡</sup><br><b>Women</b><br>All heat injuries: 15.8 <sup>‡</sup><br><b>Men</b><br>All heat injuries: 12.0 <sup>‡</sup> |
| Army Medical Surveillance Activity, 2000[33] | USA     | Descriptive epidemiology;<br>1997 - 1999                                     | US Army and Marine Corps; 3386 all heat injuries cases <sup>¶</sup><br><br>Army (1896 cases)<br><br>Marine Corps (1104 cases)            | <b>Women</b><br>All heat injuries: 2.0 <sup>†</sup><br><b>Men</b><br>All heat injuries: 1.5 <sup>†</sup><br><b>Women</b><br>All heat injuries: 4.4 <sup>†</sup><br><b>Men</b><br>All heat injuries: 2.0 <sup>†</sup>    |
| Army Medical Surveillance Activity, 2002[31] | USA     | Descriptive epidemiology<br>1990 - 1997<br><br>Case – control<br>1998 - 2001 | US Army;<br>2290 all heat injuries cases <sup>¶</sup><br><br>US Army;<br>5021 cases and 10,042 controls (all heat injuries) <sup>¶</sup> | <b>Women</b><br>All heat injuries: 14.0%<br><b>Men</b><br>All heat injuries: 86.0%<br><b>Women</b><br>All heat injuries: 20.7%<br><b>Men</b><br>All heat injuries: 79.3%                                                |

|    |                                              |     |                                |                                                                                                           |
|----|----------------------------------------------|-----|--------------------------------|-----------------------------------------------------------------------------------------------------------|
|    |                                              |     |                                | <b><u>Risk factors</u></b><br>Female: OR; 1.5 (1.4 - 1.7)                                                 |
| 5  | Army Medical Surveillance Activity, 2003[32] | USA | Descriptive epidemiology; 2002 | US Army; 1816 all heat injuries cases <sup>†</sup>                                                        |
| 6  |                                              |     |                                | <b><u>Women</u></b><br>All heat injuries: 3.5 <sup>†</sup>                                                |
| 7  |                                              |     |                                | <b><u>Men</u></b><br>All heat injuries: 5.1 <sup>†</sup>                                                  |
| 10 | Carter et al, 2005[34]                       | USA | Cross-sectional 1980 - 2002    | US Army; 5246 all heat injuries cases <sup>†</sup><br>4521 males and 725 females                          |
| 11 |                                              |     |                                | <b><u>Women</u></b><br>All heat injuries: 13.7%                                                           |
| 12 |                                              |     |                                | <b><u>Men</u></b><br>All heat injuries: 86.3%                                                             |
| 13 |                                              |     |                                | <b><u>Risk factors</u></b><br>Female: IDR: 1.21 (1.09 – 1.40)                                             |
| 16 | Army Medical Surveillance Activity, 2006[36] | USA | Descriptive epidemiology; 2005 | US Armed Forces; 204 heat stroke cases<br>958 heat exhaustion cases                                       |
| 17 |                                              |     |                                | <b><u>Women</u></b><br>Heat stroke: 0.26 <sup>†</sup><br>Heat exhaustion: 2.89 <sup>†</sup>               |
| 18 |                                              |     |                                | <b><u>Men</u></b><br>Heat stroke: 0.48 <sup>†</sup><br>Heat exhaustion: 1.98 <sup>†</sup>                 |
| 22 | Wallace et al, 2005[49]                      | USA | Case-control 1988 - 1996       | US Army; 5246 cases of heat illness;<br>4521 males and 725 females                                        |
| 23 |                                              |     |                                | <b><u>Risk factors</u></b><br><b><i>Females</i></b><br>Run time ≥ 6.9 minutes:<br>OR; 5.30 (1.59 – 17.64) |
| 24 |                                              |     |                                | <b><i>Males</i></b><br>Run time ≥ 12.9 minutes:<br>OR; 5.61 (3.73 – 8.45)                                 |
| 25 |                                              |     |                                | BMI ≥ 26 kg/m <sup>2</sup> :<br>OR; 2.10 (1.59 – 2.78)                                                    |
| 30 | Army Medical Surveillance Activity, 2007[37] | USA | Descriptive epidemiology; 2006 | US Armed Forces; 259 heat stroke cases<br>1854 heat exhaustion cases                                      |
| 31 |                                              |     |                                | <b><u>Women</u></b><br>Heat stroke: 0.14 <sup>†</sup><br>Heat exhaustion: 1.49 <sup>†</sup>               |
| 32 |                                              |     |                                | <b><u>Men</u></b><br>Heat stroke: 0.22 <sup>†</sup><br>Heat exhaustion: 1.34 <sup>†</sup>                 |
| 36 | Army Medical Surveillance Activity, 2008[38] | USA | Descriptive epidemiology; 2007 | US Armed Forces; 329 heat stroke cases<br>1853 heat exhaustion cases                                      |
| 37 |                                              |     |                                | <b><u>Women</u></b><br>Heat stroke: 0.14 <sup>†</sup><br>Heat exhaustion: 1.62 <sup>†</sup>               |
| 38 |                                              |     |                                | <b><u>Men</u></b>                                                                                         |

|    |                                              |        |                                              |                                                                                                |
|----|----------------------------------------------|--------|----------------------------------------------|------------------------------------------------------------------------------------------------|
|    |                                              |        |                                              | Heat stroke: 0.26†<br>Heat exhaustion: 1.34†                                                   |
| 5  | Army Medical Surveillance Activity, 2009[39] | USA    | Descriptive epidemiology; 2008               | US Armed Forces; 299 heat stroke cases<br>1467 heat exhaustion cases                           |
| 6  |                                              |        |                                              | <b><u>Women</u></b><br>Heat stroke: 0.16†<br>Heat exhaustion: 1.35†                            |
| 7  |                                              |        |                                              | <b><u>Men</u></b><br>Heat stroke: 0.22†<br>Heat exhaustion: 1.78†                              |
| 11 | Army Medical Surveillance Activity, 2010[40] | USA    | Descriptive epidemiology; 2009               | US Armed Forces; 323 heat stroke cases<br>2038 other heat injuries cases*                      |
| 12 |                                              |        |                                              | <b><u>Women</u></b><br>Heat stroke: 0.15†<br>Other heat injuries: 1.78†                        |
| 13 |                                              |        |                                              | <b><u>Men</u></b><br>Heat stroke: 0.24†<br>Other heat injuries: 1.35†                          |
| 17 | Army Medical Surveillance Activity, 2011[41] | USA    | Descriptive epidemiology; 2010               | US Armed Forces; 311 heat stroke cases<br>2576 other heat injuries cases*                      |
| 18 |                                              |        |                                              | <b><u>Women</u></b><br>Heat stroke: 0.12†<br>Other heat injuries: 2.32†                        |
| 19 |                                              |        |                                              | <b><u>Men</u></b><br>Heat stroke: 0.23†<br>Other heat injuries: 1.67†                          |
| 23 | Army Medical Surveillance Activity, 2012[42] | USA    | Descriptive epidemiology; 2011               | US Armed Forces; 362 heat stroke cases<br>2652 other heat injuries cases*                      |
| 24 |                                              |        |                                              | <b><u>Women</u></b><br>Heat stroke: 0.10†<br>Other heat injuries: 2.63†                        |
| 25 |                                              |        |                                              | <b><u>Men</u></b><br>Heat stroke: 0.27†<br>Other heat injuries: 1.68†                          |
| 28 | Druyan et al, 2012[12]                       | Israel | Retrospective cross-sectional<br>2008 – 2010 | Israeli Defence Forces;<br>170 males and 9 females                                             |
| 29 |                                              |        |                                              | <b><u>Heat tolerance parameters</u></b><br><b><u>Women</u></b><br>Heat intolerance rate: 66.6% |
| 32 |                                              |        |                                              | <b><u>Men</u></b><br>Heat intolerance rate: 25.79%                                             |
| 34 | Army Medical Surveillance Activity, 2013[43] | USA    | Descriptive epidemiology; 2012               | US Armed Forces; 365 heat stroke cases<br>2257 other heat injuries cases*                      |
| 35 |                                              |        |                                              | <b><u>Women</u></b><br>Heat stroke: 0.15†<br>Other heat injuries: 2.35†                        |
| 36 |                                              |        |                                              | <b><u>Men</u></b><br>Heat stroke: 0.27†<br>Other heat injuries: 1.44†                          |

|                                        |                                              |     |                                |                                                                           |                                                                                                                                                     |
|----------------------------------------|----------------------------------------------|-----|--------------------------------|---------------------------------------------------------------------------|-----------------------------------------------------------------------------------------------------------------------------------------------------|
| 1<br>2<br>3<br>4<br>5<br>6<br>7<br>8   | Army Medical Surveillance Activity, 2014[44] | USA | Descriptive epidemiology; 2013 | US Armed Forces; 324 heat stroke cases<br>1701 other heat injuries cases* | <b><u>Women</u></b><br>Heat stroke: 0.15†<br>Other heat injuries: 1.30†<br><b><u>Men</u></b><br>Heat stroke: 0.24†<br>Other heat injuries: 1.19†    |
| 9<br>10<br>11<br>12                    | Bedno et al, 2014[35]                        | USA | Analytical cross-sectional     | US Armed Forces;<br>80 exertional heat illness cases                      | <b><u>Women</u></b><br>Heat illness: 0.680%<br><b><u>Men</u></b><br>Heat illness: 0.71%                                                             |
| 13<br>14<br>15<br>16<br>17             | Lisman et al, 2014[27]                       | USA | Analytical cross-sectional     | Military and university community members;<br><br>34 males and 12 females | <b><u>Heat tolerance parameters</u></b><br><b><i>Women</i></b><br>Heat intolerance rate: 42%<br><b><i>Men</i></b><br>Heat intolerance rate: 27%     |
| 18<br>19<br>20<br>21<br>22             | Army Medical Surveillance Activity, 2015[45] | USA | Descriptive epidemiology; 2014 | US Armed Forces; 314 heat stroke cases<br>1410 other heat injuries cases* | <b><u>Women</u></b><br>Heat stroke: 0.14†<br>Other heat injuries: 1.31†<br><b><u>Men</u></b><br>Heat stroke: 0.27†<br>Other heat injuries: 1.21†    |
| 23<br>24<br>25<br>26<br>27<br>28<br>29 | Kazman et al, 2015[28]                       | USA | Analytical cross-sectional     | Military and university community members;<br>55 males and 20 females     | <b><u>Heat tolerance parameters</u></b><br><b><i>Women</i></b><br>Heat intolerance rate: 45%<br><br><b><i>Men</i></b><br>Heat intolerance rate: 18% |
| 30<br>31<br>32<br>33<br>34<br>35       | Army Medical Surveillance Activity, 2016[46] | USA | Descriptive epidemiology; 2015 | US Armed Forces; 417 heat stroke cases<br>1625 other heat injuries cases* | <b><u>Women</u></b><br>Heat stroke: 0.16†<br>Other heat injuries: 1.54†<br><b><u>Men</u></b><br>Heat stroke: 0.35†<br>Other heat injuries: 1.48†    |
| 36<br>37<br>38<br>39<br>40             | Army Medical Surveillance Activity, 2017[47] | USA | Descriptive epidemiology; 2016 | US Armed Forces; 401 heat stroke cases<br>2135 other heat injuries cases* | <b><u>Women</u></b><br>Heat stroke: 0.19†<br>Other heat injuries: 1.90†<br><b><u>Men</u></b><br>Heat stroke: 0.33†                                  |

|   |                        |     |                            |                            |
|---|------------------------|-----|----------------------------|----------------------------|
| 1 |                        |     |                            | Other heat injuries: 1.61† |
| 2 |                        |     |                            |                            |
| 3 |                        |     |                            |                            |
| 4 | Army Medical           | USA | Descriptive epidemiology;  | <b>Women</b>               |
| 5 | Surveillance Activity, |     | US Armed Forces;           | Heat stroke: 0.25†         |
| 6 | 2018[48]               |     | 464 heat stroke cases      | Other heat injuries: 1.38† |
| 7 |                        |     | 1699 heat exhaustion cases | <b>Men</b>                 |
| 8 |                        |     |                            | Heat stroke: 0.41†         |
| 9 |                        |     |                            | Other heat injuries: 1.41† |

10 § Proportions and incidences reported are of the total cases reported in the articles

11 # Incidence rate reported per 100,000 person-years.

12 ‡ Incidence rate per 100,000 person- months.

13 † Incidence rate reported per 1000 person-years.

14 \* Other heat injuries include “heat exhaustion” and “unspecified effects of heat”.

15 ¶ heat injuries include heat stroke and other heat injuries.

16 US = United States of America; 2006 to date, heat injuries was reported in the US Armed Forces (Army, Navy, Air Force and Marine Corps).

17 UK = United Kingdom; USA = United States of America

Supplemental Table 3: Quality assessment of included studies using the quality assessment tool for studies with diverse designs (QATSDD)

| QATSDD Criteria       | 1 | 2 | 3 | 4 | 5 | 6 | 7 | 8 | 9 | 10 | 11 | 12 | Total score | % of total score |
|-----------------------|---|---|---|---|---|---|---|---|---|----|----|----|-------------|------------------|
| Dickinson' 94[29]     | 0 | 1 | 2 | 0 | 1 | 3 | 0 | 0 | 3 | 2  | 0  | 2  | 14/36       | 38.9             |
| AMSA'98[30]           | 2 | 1 | 1 | 0 | 0 | 0 | 0 | 0 | 2 | 2  | 0  | 0  | 8/36        | 22.2             |
| AMSA'00[33]           | 2 | 1 | 2 | 0 | 0 | 1 | 0 | 0 | 2 | 3  | 0  | 0  | 11/36       | 30.6             |
| AMSA'02[31]           | 3 | 0 | 2 | 0 | 1 | 1 | 0 | 0 | 2 | 0  | 2  | 0  | 11/36       | 30.6             |
| AMSA'03[32]           | 2 | 1 | 1 | 0 | 1 | 1 | 0 | 0 | 2 | 2  | 0  | 0  | 10/36       | 27.8             |
| Carter et al' 05[34]  | 3 | 3 | 3 | 2 | 2 | 3 | 1 | 2 | 3 | 3  | 2  | 0  | 27/36       | 75               |
| AMSA'06[36]           | 2 | 1 | 1 | 0 | 1 | 1 | 0 | 0 | 2 | 2  | 0  | 0  | 10/36       | 27.8             |
| Wallace et al' 06[49] | 3 | 3 | 3 | 2 | 2 | 3 | 1 | 2 | 3 | 3  | 2  | 2  | 29/36       | 80.6             |
| AMSA'07[37]           | 1 | 1 | 1 | 0 | 0 | 1 | 0 | 0 | 2 | 2  | 0  | 0  | 8/36        | 22.2             |
| AMSA' 08[38]          | 1 | 1 | 1 | 0 | 0 | 1 | 0 | 0 | 2 | 2  | 0  | 0  | 8/36        | 22.2             |
| AMSA' 09[39]          | 1 | 1 | 1 | 0 | 0 | 1 | 0 | 0 | 2 | 2  | 0  | 0  | 8/36        | 22.2             |
| AMSA' 10[40]          | 1 | 1 | 2 | 0 | 0 | 1 | 0 | 0 | 2 | 2  | 0  | 2  | 11/36       | 30.6             |
| AMSA' 11[41]          | 2 | 1 | 2 | 0 | 0 | 1 | 0 | 0 | 2 | 2  | 0  | 2  | 12/36       | 33.3             |
| Druyan et al'12[12]   | 3 | 3 | 3 | 1 | 0 | 2 | 0 | 3 | 3 | 2  | 2  | 1  | 23/36       | 63.9             |
| AMSA' 12[42]          | 2 | 1 | 2 | 0 | 0 | 1 | 0 | 0 | 2 | 2  | 0  | 2  | 12/36       | 33.3             |
| AMSA' 13[43]          | 2 | 2 | 2 | 0 | 0 | 2 | 0 | 0 | 2 | 2  | 0  | 2  | 14/36       | 38.9             |
| AMSA' 14[44]          | 2 | 2 | 2 | 0 | 0 | 2 | 0 | 0 | 2 | 3  | 0  | 2  | 15/36       | 41.7             |
| Lisman et al,'14 [27] | 3 | 3 | 3 | 2 | 2 | 3 | 2 | 3 | 3 | 3  | 3  | 3  | 33/36       | 91.7             |
| AMSA' 15[45]          | 3 | 2 | 2 | 0 | 0 | 2 | 0 | 0 | 2 | 3  | 0  | 2  | 16/36       | 44.4             |
| Bedno et al, 2015[35] | 3 | 3 | 3 | 2 | 2 | 3 | 3 | 3 | 3 | 3  | 3  | 3  | 34/36       | 94.4             |
| Kazman et al' 15[28]  | 3 | 3 | 3 | 2 | 2 | 3 | 2 | 3 | 3 | 3  | 3  | 3  | 33/36       | 91.7             |
| AMSA' 16[46]          | 3 | 2 | 2 | 0 | 0 | 2 | 0 | 0 | 2 | 3  | 0  | 2  | 16/36       | 44.4             |
| AMSA' 17[47]          | 3 | 2 | 2 | 0 | 0 | 2 | 0 | 0 | 2 | 3  | 0  | 2  | 16/36       | 44.4             |
| AMSA' 18[48]          | 3 | 2 | 2 | 0 | 0 | 2 | 0 | 0 | 2 | 3  | 0  | 2  | 16/36       | 44.4             |

QATSDD Criteria

- (1) Theoretical framework;
  - (2) Aims/objectives;
  - (3) Description of research setting
  - (4) Sample size;
  - (5) Representative sample of target group
  - (6) Procedure for data collection
  - (7) Rationale for choice of data collection tool(s)
  - (8) Detailed recruitment data
  - (9) Fit between research question and method of data collection (Quantitative only)
  - (10) Fit between research question and method of analysis (Quantitative only)
  - (11) Good justification for analytical method selected
  - (12) Strengths and limitations.
- QATSDD rating scale: 0=not at all; 1=very slightly; 2=moderately; 3=complete; AMSA = Army Medical Surveillance Activity*





# PRISMA 2009 Checklist

1  
2  
3  
4  
5  
6  
7  
8  
9  
10  
11  
12  
13  
14  
15  
16  
17  
18  
19  
20  
21  
22  
23  
24  
25  
26  
27  
28  
29  
30  
31  
32  
33  
34  
35  
36  
37  
38  
39  
40  
41  
42  
43  
44  
45  
46  
47

| Section/topic                      | #  | Checklist item                                                                                                                                                                                                                                                                                              | Reported on page #      |
|------------------------------------|----|-------------------------------------------------------------------------------------------------------------------------------------------------------------------------------------------------------------------------------------------------------------------------------------------------------------|-------------------------|
| <b>TITLE</b>                       |    |                                                                                                                                                                                                                                                                                                             |                         |
| Title                              | 1  | Identify the report as a systematic review, meta-analysis, or both.                                                                                                                                                                                                                                         | 1                       |
| <b>ABSTRACT</b>                    |    |                                                                                                                                                                                                                                                                                                             |                         |
| Structured summary                 | 2  | Provide a structured summary including, as applicable: background; objectives; data sources; study eligibility criteria, participants, and interventions; study appraisal and synthesis methods; results; limitations; conclusions and implications of key findings; systematic review registration number. | 2                       |
| <b>INTRODUCTION</b>                |    |                                                                                                                                                                                                                                                                                                             |                         |
| Rationale                          | 3  | Describe the rationale for the review in the context of what is already known.                                                                                                                                                                                                                              | 4,5                     |
| Objectives                         | 4  | Provide an explicit statement of questions being addressed with reference to participants, interventions, comparisons, outcomes, and study design (PICOS).                                                                                                                                                  | 7                       |
| <b>METHODS</b>                     |    |                                                                                                                                                                                                                                                                                                             |                         |
| Protocol and registration          | 5  | Indicate if a review protocol exists, if and where it can be accessed (e.g., Web address), and, if available, provide registration information including registration number.                                                                                                                               | 7                       |
| Eligibility criteria               | 6  | Specify study characteristics (e.g., PICOS, length of follow-up) and report characteristics (e.g., years considered, language, publication status) used as criteria for eligibility, giving rationale.                                                                                                      | 7, 8                    |
| Information sources                | 7  | Describe all information sources (e.g., databases with dates of coverage, contact with study authors to identify additional studies) in the search and date last searched.                                                                                                                                  | 8                       |
| Search                             | 8  | Present full electronic search strategy for at least one database, including any limits used, such that it could be repeated.                                                                                                                                                                               | 7, supplementary file 1 |
| Study selection                    | 9  | State the process for selecting studies (i.e., screening, eligibility, included in systematic review, and, if applicable, included in the meta-analysis).                                                                                                                                                   | Figure 1                |
| Data collection process            | 10 | Describe method of data extraction from reports (e.g., piloted forms, independently, in duplicate) and any processes for obtaining and confirming data from investigators.                                                                                                                                  | 8                       |
| Data items                         | 11 | List and define all variables for which data were sought (e.g., PICOS, funding sources) and any assumptions and simplifications made.                                                                                                                                                                       | 8                       |
| Risk of bias in individual studies | 12 | Describe methods used for assessing risk of bias of individual studies (including specification of whether this was done at the study or outcome level), and how this information is to be used in any data synthesis.                                                                                      | 8, 9                    |
| Summary measures                   | 13 | State the principal summary measures (e.g., risk ratio, difference in means).                                                                                                                                                                                                                               | 9                       |
| Synthesis of results               | 14 | Describe the methods of handling data and combining results of studies, if done, including measures of consistency (e.g., $I^2$ ) for each meta-analysis.                                                                                                                                                   | 9                       |

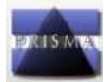

# PRISMA 2009 Checklist

Page 1 of 2

| Section/topic                 | #  | Checklist item                                                                                                                                                                                           | Reported on page #                        |
|-------------------------------|----|----------------------------------------------------------------------------------------------------------------------------------------------------------------------------------------------------------|-------------------------------------------|
| Risk of bias across studies   | 15 | Specify any assessment of risk of bias that may affect the cumulative evidence (e.g., publication bias, selective reporting within studies).                                                             | 8                                         |
| Additional analyses           | 16 | Describe methods of additional analyses (e.g., sensitivity or subgroup analyses, meta-regression), if done, indicating which were pre-specified.                                                         | N/A                                       |
| <b>RESULTS</b>                |    |                                                                                                                                                                                                          |                                           |
| Study selection               | 17 | Give numbers of studies screened, assessed for eligibility, and included in the review, with reasons for exclusions at each stage, ideally with a flow diagram.                                          | Figure 1                                  |
| Study characteristics         | 18 | For each study, present characteristics for which data were extracted (e.g., study size, PICOS, follow-up period) and provide the citations.                                                             | 10, Supplementary file 2                  |
| Risk of bias within studies   | 19 | Present data on risk of bias of each study and, if available, any outcome level assessment (see item 12).                                                                                                | 15                                        |
| Results of individual studies | 20 | For all outcomes considered (benefits or harms), present, for each study: (a) simple summary data for each intervention group (b) effect estimates and confidence intervals, ideally with a forest plot. | 10, 11, 12, 13, 14, Figure 1 and Figure 2 |
| Synthesis of results          | 21 | Present results of each meta-analysis done, including confidence intervals and measures of consistency.                                                                                                  | NA                                        |
| Risk of bias across studies   | 22 | Present results of any assessment of risk of bias across studies (see Item 15).                                                                                                                          | 15                                        |
| Additional analysis           | 23 | Give results of additional analyses, if done (e.g., sensitivity or subgroup analyses, meta-regression [see Item 16]).                                                                                    | N/A                                       |
| <b>DISCUSSION</b>             |    |                                                                                                                                                                                                          |                                           |
| Summary of evidence           | 24 | Summarize the main findings including the strength of evidence for each main outcome; consider their relevance to key groups (e.g., healthcare providers, users, and policy makers).                     | 16                                        |
| Limitations                   | 25 | Discuss limitations at study and outcome level (e.g., risk of bias), and at review-level (e.g., incomplete retrieval of identified research, reporting bias).                                            | 18, 19                                    |
| Conclusions                   | 26 | Provide a general interpretation of the results in the context of other evidence, and implications for future research.                                                                                  | 16, 17, 18                                |
| <b>FUNDING</b>                |    |                                                                                                                                                                                                          |                                           |
| Funding                       | 27 | Describe sources of funding for the systematic review and other support (e.g., supply of data); role of funders for the systematic review.                                                               | 22                                        |

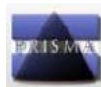

# PRISMA 2009 Checklist

For more information, visit: [www.prisma-statement.org](http://www.prisma-statement.org). Page 2 of 2

For peer review only

1  
2  
3  
4  
5  
6  
7  
8  
9  
10  
11  
12  
13  
14  
15  
16  
17  
18  
19  
20  
21  
22  
23  
24  
25  
26  
27  
28  
29  
30  
31  
32  
33  
34  
35  
36  
37  
38  
39  
40  
41  
42  
43  
44  
45  
46  
47

# BMJ Open

## A Systematic Review of the Gender Differences in the Epidemiology and Risk Factors of Exertional Heat Illness and Heat tolerance in the Armed Forces

|                                 |                                                                                                                                                                                                                                                                                                                                       |
|---------------------------------|---------------------------------------------------------------------------------------------------------------------------------------------------------------------------------------------------------------------------------------------------------------------------------------------------------------------------------------|
| Journal:                        | <i>BMJ Open</i>                                                                                                                                                                                                                                                                                                                       |
| Manuscript ID                   | bmjopen-2019-031825.R3                                                                                                                                                                                                                                                                                                                |
| Article Type:                   | Original research                                                                                                                                                                                                                                                                                                                     |
| Date Submitted by the Author:   | 06-Feb-2020                                                                                                                                                                                                                                                                                                                           |
| Complete List of Authors:       | Alele, Faith; James Cook University, College of Healthcare Sciences Malau-Aduli, Bunmi; James Cook University, College of Medicine and Dentistry Malau-Aduli, Aduli; James Cook University, College of Public Health, Medical and Veterinary Sciences Crowe, Melissa; James Cook University, Division of Tropical Health and Medicine |
| <b>Primary Subject Heading</b>: | Occupational and environmental medicine                                                                                                                                                                                                                                                                                               |
| Secondary Subject Heading:      | Sports and exercise medicine                                                                                                                                                                                                                                                                                                          |
| Keywords:                       | OCCUPATIONAL & INDUSTRIAL MEDICINE, ACCIDENT & EMERGENCY MEDICINE, Heat Stroke, Armed Forces, Women                                                                                                                                                                                                                                   |
|                                 |                                                                                                                                                                                                                                                                                                                                       |

SCHOLARONE™  
Manuscripts

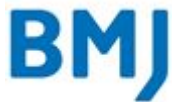

I, the Submitting Author has the right to grant and does grant on behalf of all authors of the Work (as defined in the below author licence), an exclusive licence and/or a non-exclusive licence for contributions from authors who are: i) UK Crown employees; ii) where BMJ has agreed a CC-BY licence shall apply, and/or iii) in accordance with the terms applicable for US Federal Government officers or employees acting as part of their official duties; on a worldwide, perpetual, irrevocable, royalty-free basis to BMJ Publishing Group Ltd ("BMJ") its licensees and where the relevant Journal is co-owned by BMJ to the co-owners of the Journal, to publish the Work in this journal and any other BMJ products and to exploit all rights, as set out in our [licence](#).

The Submitting Author accepts and understands that any supply made under these terms is made by BMJ to the Submitting Author unless you are acting as an employee on behalf of your employer or a postgraduate student of an affiliated institution which is paying any applicable article publishing charge ("APC") for Open Access articles. Where the Submitting Author wishes to make the Work available on an Open Access basis (and intends to pay the relevant APC), the terms of reuse of such Open Access shall be governed by a Creative Commons licence – details of these licences and which [Creative Commons](#) licence will apply to this Work are set out in our licence referred to above.

Other than as permitted in any relevant BMJ Author's Self Archiving Policies, I confirm this Work has not been accepted for publication elsewhere, is not being considered for publication elsewhere and does not duplicate material already published. I confirm all authors consent to publication of this Work and authorise the granting of this licence.

1  
2  
3 1 **A Systematic Review of the Gender Differences in the Epidemiology and Risk Factors of**  
4  
5 2 **Exertional Heat Illness and Heat tolerance in the Armed Forces**  
6  
7

8 3 **Type of article:** Review  
9

10  
11 4 **Authors**

12  
13 5 Faith O. Alele<sup>1\*</sup>

14 6 MPHTM, MBBS

15 7 [Faith.alele@my.jcu.edu.au](mailto:Faith.alele@my.jcu.edu.au)

16 8 +617 47815082  
17  
18 9

19 10 A/Prof Bunmi S. Malau-Aduli<sup>2</sup>

20 11 PhD, MSc, BSc (Hons)

21 12 [Bunmi.malauaduli@jcu.edu.au](mailto:Bunmi.malauaduli@jcu.edu.au)  
22  
23 13

24 14 A/Prof Aduli EO. Malau-Aduli<sup>3</sup>

25 15 PhD, MSc, BSc (Hons)

26 16 [Aduli.malauaduli@jcu.edu.au](mailto:Aduli.malauaduli@jcu.edu.au)  
27  
28 17

29 18 Dr Melissa Crowe<sup>4</sup>

30 19 PhD, BSc (Hons)

31 20 [Melissa.crowe@jcu.edu.au](mailto:Melissa.crowe@jcu.edu.au)  
32  
33 21

34  
35 22 <sup>1</sup>College of Healthcare Sciences, James Cook University, Townsville QLD 4811, Australia

36  
37 23 <sup>2</sup>College of Medicine and Dentistry, James Cook University, Townsville QLD 4814, Australia

38  
39 24 <sup>3</sup>College of Public Health, Medical and Veterinary Sciences, James Cook University,  
40 25 Townsville QLD 4811, Australia

41  
42 26 <sup>4</sup>Division of Tropical Health and Medicine, James Cook University, Townsville QLD 4811,  
43 27 Australia  
44  
45 28

46  
47 29 **\*Corresponding author:**

48  
49 30 Faith O. Alele, College of Healthcare Sciences, James Cook University, Townsville QLD 4811,  
50 31 Australia, Townsville QLD 4811, Australia

51  
52 32 Tel: +617 47815082

53  
54 33 Email: [faith.alele@my.jcu.edu.au](mailto:faith.alele@my.jcu.edu.au)

55  
56 34 Word count: 3993  
57  
58 35

1  
2  
3 36 **Abstract**  
4  
5

6 37 **Objectives:** This review aimed to describe the epidemiology of all heat related illnesses in  
7  
8  
9 38 women compared to men in the armed forces and to identify gender-specific risk factors and  
10  
11 39 differences in heat tolerance.  
12

13  
14 40 **Design:** A systematic review of multiple databases (MEDLINE, Emtree, CINAHL,  
15  
16 41 PsycINFO, Informit, and Scopus) was conducted from the inception of the databases to 1 April  
17  
18 42 2019 using the preferred reporting items for systematic review and meta-analysis (PRISMA)  
19  
20 43 guidelines.  
21  
22

23  
24 44 **Eligibility criteria:** All relevant studies investigating and comparing heat illness and heat  
25  
26 45 tolerance in women and men in the armed forces were included in the review.  
27  
28

29 46 **Results:**  
30

31  
32 47 Twenty-four (24) studies were included in the systematic review. The incidence of heat stroke  
33  
34 48 in women ranged from 0.10 to 0.26 per 1000 person-years, while the incidence of heat stroke  
35  
36 49 ranged from 0.22 to 0.48 per 1000 person-years in men. The incidence of other heat illnesses  
37  
38 50 in women compared to men ranged from 1.30 to 2.89 per 1000 person-years vs 0.98 to 1.98  
39  
40 51 per 1000 person-years. The limited evidence suggests that women had a greater risk of  
41  
42 52 exertional heat illness compared to men. Other gender-specific risk factors were slower run  
43  
44 53 times and body mass index. Although there was a higher proportion of women who were heat  
45  
46 54 intolerant compared to men; this finding needs to be interpreted with caution due to the limited  
47  
48 55 evidence.  
49  
50

51  
52  
53 56 **Conclusion:** The findings of this review suggest that men experienced a slightly higher  
54  
55 57 incidence of heat stroke than women in the armed forces. In addition, the limited available  
56  
57 58 evidence suggests that a higher proportion of women were heat intolerant and being a female  
58  
59  
60

1  
2  
3 59 was associated with a greater risk of exertional heat illnesses. Given the limited evidence  
4  
5 60 available, further research is required to investigate the influence of gender differences on heat  
6  
7 61 intolerance and heat illness.  
8  
9

## 10 62 **Article summary**

### 13 63 **Strengths and limitations of this study**

- 17 64 • This is the first known systematic review investigating the impact of gender on  
18 65 exertional heat illness and heat tolerance in the armed forces.
- 21 66 • We conducted a comprehensive search and identified potential risk factors that are  
22 67 associated with exertional heat illness.
- 25 68 • Most of the included studies utilized retrospective data with an increased likelihood of  
26 69 misclassification bias which may have underestimated or overestimated the association  
27 70 between heat-related illness and risk factors.

31 71 **Trial registration:** None

### 34 72 **Key words**

37 73 Heat stress; Heat stroke; Heat exhaustion; Heat tolerance; Women; Armed Forces  
38  
39  
40  
41  
42  
43 74  
44  
45  
46 75  
47  
48  
49 76  
50  
51  
52 77  
53  
54  
55 78  
56  
57  
58 79  
59  
60



## 80 Introduction

81 Heat illnesses are disorders that arise after prolonged exposure to heat/humidity and/or  
82 increased physical activity.[1] When body temperature rises, conduction, convection, radiation  
83 and evaporation mechanisms help to cool the body and maintain normothermia.[1] However,  
84 heat loss is susceptible to prevailing environmental conditions and type of clothing worn.  
85 Without adequate cooling heat illnesses may occur including exercise-associated muscle  
86 cramps (EAMC), heat syncope, heat exhaustion and heat stroke, a potentially life-threatening  
87 disorder.[1]

88 Heat stroke is a medical emergency.[2] It is characterized by elevated core temperature of 40°C  
89 and above, central nervous system disturbances and multi-organ damage that may result in  
90 death.[2] Heat stroke has been classified as either classic or exertional.[3] Classic heat stroke  
91 is insidious in onset and occurs in vulnerable populations such as young children, the elderly  
92 and patients with chronic diseases.[4] On the other hand, exertional heat stroke occurs more  
93 rapidly and affects healthy, active people such as athletes, factory workers, construction  
94 workers, agricultural workers, firefighters and armed forces personnel.[5] The workers in these  
95 industries often require high levels of physical exertion to perform jobs and tasks. A  
96 combination of rigorous activities and extreme exposure to heat place the workers at increased  
97 risk of heat stroke.[6]

98 Among armed forces personnel, exertional heat illness continues to pose as a significant cause  
99 of morbidity and mortality. [7] Operations and training may involve exposure to high ambient  
100 temperature and heavy workload which may result in heat illness.[7] Historically, men have  
101 occupied military roles and responsibilities with fewer proportion of women in the armed  
102 forces.[8] However, more women are joining the armed forces globally following the inclusive  
103 approach to recruiting and creation of more roles for women.[9] Women are required to operate

1  
2  
3 104 in austere environments with heat illnesses becoming more frequent.[9] This has raised the  
4  
5 105 question about gender differences in thermoregulation during heat stress.[9] Evidence suggests  
6  
7 106 that women differ from men in thermal responses to heat.[10] This difference may be because  
8  
9 107 women have a lower rate of whole-body evaporative heat loss, higher body fat mass, body  
10  
11 108 mass ratio,[11] number of sweat glands and lower aerobic fitness.[12] Also, hormonal  
12  
13 109 variations due to menstrual cyclic patterns and the use of contraceptive pills may be associated  
14  
15 110 with the differences in response to heat stress.[13]

16  
17  
18  
19  
20 111 When exertional heat illness occurs, it may be challenging to determine if an individual may  
21  
22 112 return to duty. An inaccurate determination of complete recovery among armed forces  
23  
24 113 personnel may negatively impact military readiness.[14] While, there are no evidence-based  
25  
26 114 recommendations for return to duty, the American College of Sports Medicine (ACSM)  
27  
28 115 guidelines states that exertional heat stroke patients may return to duty after re-establishing  
29  
30 116 heat tolerance.[15] Individuals vary in their ability to cope with heat stress and the inability to  
31  
32 117 withstand heat stress during exertion in hot environments is defined as heat intolerance.[2]  
33  
34 118 Evidence suggests that heat intolerance may be as a direct result of heat stroke or due to  
35  
36 119 predisposing inherent factors (genetics).[2] However, the objective criteria or measure for  
37  
38 120 defining heat tolerance or intolerance remains a subject of controversy.[14] The current return  
39  
40 121 to duty guidelines for military personnel varies across countries.[16] For example, in the United  
41  
42 122 States, the military return to duty process is based on clinical assessments with gradual  
43  
44 123 acclimatization and re-introduction of duties.[17] By contrast, return to duty in the Israeli  
45  
46 124 Defence Force requires a heat tolerance test to determine if an individual is heat tolerant.[18]  
47  
48 125 Therefore, it is important to develop evidence-based return to duty protocols across the globe.  
49  
50 126 The Israeli Defence Force originally developed the heat tolerance test in 1979 as an index of  
51  
52 127 the ability of soldiers to cope with exertional heat.[18] Individuals who have suffered heat  
53  
54 128 stroke are sent for a heat tolerance test after a minimum recovery period of 6 to 8 weeks as part

1  
2  
3 129 of the return to duty process.[18] Criteria used to define heat intolerance include an elevation  
4  
5 130 in rectal temperature above 38.5°C and heart rate above 150 bpm or when rectal temperature  
6  
7  
8 131 or heart rate fails to stabilize during the test. The heat tolerance test criteria are based on  
9  
10 132 previous studies by Shapiro et al.[19] which utilised only male military participants.[18, 19]  
11  
12 133 While the test may be considered as a useful tool to determine return to duty and to prevent  
13  
14 134 subsequent exertional heat stroke, [18,19] there is no consensus on the validity of the tool as a  
15  
16 135 diagnostic test for heat tolerance.[14] Furthermore, the heat tolerance test does not account for  
17  
18 136 predicting factors such as gender.[14] Given the limitation, questions have been raised about  
19  
20 137 the validity of the protocol in determining return to duty for females in the armed forces. It has  
21  
22 138 been suggested that more research is required to determine whether or not a new protocol  
23  
24 139 should be developed for women.[12]

25  
26  
27  
28  
29 140 As restrictions on gender based-exclusions from military specializations are lifted,[20] it is  
30  
31 141 imperative to understand and evaluate exertional heat illness in women compared to men and  
32  
33 142 identify the gender-specific risk factors. Furthermore, it is important to understand how women  
34  
35 143 respond to the heat tolerance test compared to men. According to a recent review on the risk  
36  
37 144 of heat illness in women compared with men in the general population, men are at increased  
38  
39 145 risk of heat illness compared to women.[21] However, no previous review has investigated the  
40  
41 146 epidemiology and risk factors of heat illness as well as gender responses to the heat tolerance  
42  
43 147 test in men and women in the armed forces. Given that, heat illness can impact defence  
44  
45 148 operational effectiveness and may result in acute loss of manpower and possible medical  
46  
47 149 discharge from service,[22] the review should be conducted to inform policies.

48  
49  
50  
51  
52 150 Therefore, the objective of this systematic review was to provide a comprehensive summary of  
53  
54 151 the epidemiology of heat illness and heat intolerance in women and men in the armed forces.  
55  
56  
57  
58 152 Specific aims were  
59  
60

1  
2  
3 153 To determine the incidence and prevalence of heat illness in women compared to men  
4  
5 154 in the armed forces:  
6  
7

8 155 To identify gender differences in heat tolerance in the armed forces and  
9  
10

11 156 To identify gender-specific predisposing risk factors associated with heat illness in the  
12  
13 157 armed forces  
14  
15

16 158  
17  
18

## 19 159 **Methods**

### 20 160 **Search Strategy**

21  
22  
23 161 This review utilised the Preferred Reporting Items for Systematic Review and Meta-analysis  
24  
25 162 (PRISMA) guidelines [23] to explore all literature published in English from the inception of  
26  
27 163 the different databases to 1 April 2019. Databases searched were MEDLINE, CINAHL,  
28  
29 164 PsycINFO, Emcare, Informit and Scopus. A preliminary search was conducted in Medline,  
30  
31 165 Emcare and CINAHL to identify relevant keywords contained in the titles, abstracts and subject  
32  
33 166 descriptors. These search terms were used to conduct the search in other databases without  
34  
35 167 subject headings. The search strategy used in Medline is presented in supplemental Table 1.  
36  
37 168 No review protocol exists.  
38  
39  
40  
41  
42  
43  
44

### 45 169 **Eligibility criteria**

46  
47  
48 170 Studies included in the review were assessed according to the following inclusion criteria: Peer-  
49  
50 171 reviewed literature comparing heat illness in women to men in the armed forces or reporting  
51  
52 172 heat tolerance in women and men of the armed forces. Exclusions included literature discussing  
53  
54 173 heat illness in other occupations, or studies where data on heat illness in women could not be  
55  
56 174 separated from men or studies reporting heat illness in men or literature reviews, conference  
57  
58  
59  
60

1  
2  
3 175 abstracts and grey literature. In addition, additional primary data sources were identified from  
4  
5 176 the reference lists of the included studies using a hand-search technique (Figure 1).  
6  
7

### 8 177 **Selection of studies and data extraction**

9  
10  
11 178 FA and BMA identified all included studies and data extraction was performed using a standard  
12  
13 179 abstraction form. Data extracted from the studies included: study location and design,  
14  
15 180 population, proportion and incidence of heat illnesses, factors associated with heat illness and  
16  
17 181 heat tolerance, and heat tolerance in men and women. All authors cross-checked the extracted  
18  
19 182 data for consistency.  
20  
21  
22

### 23 183 **Quality assessment**

24  
25  
26 184 The methodological quality assessment was assessed by FA in consultation with MC using the  
27  
28 185 modified quality assessment tool for studies with diverse designs (QATSDD) critical appraisal  
29  
30 186 tool.[24] Any disagreement about any article was reviewed by BMA and AMA and discussed  
31  
32 187 until consensus was reached. The QATSDD tool is a 16-item tool which assesses the quality  
33  
34 188 of diverse studies (both quantitative and qualitative).[24] The tool was modified to exclude two  
35  
36 189 items relating to qualitative studies as well as two items relating to quantitative studies that did  
37  
38 190 not to the studies included in the review. The items excluded comprised statistical assessment  
39  
40 191 of the reliability and validity of measurement tool(s) (Quantitative only), fit between stated  
41  
42 192 research question and format and content of data collection tool e.g. interview schedule  
43  
44 193 (Qualitative), assessment of reliability of analytical process (Qualitative only) and evidence of  
45  
46 194 user involvement in design. Each criterion in the modified QATSDD tool was awarded a score  
47  
48 195 of 0 to 3 with 0 = not at all, 1 = very slightly, 2 = moderately and 3 = complete. The scores of  
49  
50 196 each criterion were summed to assess the methodological quality of included studies with a  
51  
52 197 maximum score of 36. The criteria included were (1) theoretical framework; (2) statement of  
53  
54 198 aims/objectives; (3) description of research setting; (4) evidence of sample size; (5)  
55  
56  
57  
58  
59  
60

1  
2  
3 199 representative sample of target group of a reasonable size, (6) description of procedure for data  
4  
5 200 collection; (7) rationale for choice of data collection tool(s); (8) detailed recruitment data; (9)  
6  
7 201 fit between research question and method of data collection (Quantitative only); (10) fit  
8  
9 202 between research question and method of analysis (Quantitative only); (11) good justification  
10  
11 203 for analytical method selected; and (12) strengths and limitations. For ease of interpretation,  
12  
13 204 the scores were converted to percentages and classified as low (<50%), medium (50-80%) or  
14  
15 205 high (>80%) quality of evidence.  
16  
17  
18  
19

## 20 206 **Patient and public involvement**

21  
22  
23 207 Patients and the public were not involved in the design or planning of the study.  
24  
25

## 26 208 **Data analysis and synthesis**

27  
28  
29 209 In this review, the International Classification of Diseases ICD 9 or ICD 10 diagnosis codes  
30  
31 210 [25, 26] for the effects of heat and light were used to classify heat illnesses. All included studies  
32  
33 211 utilized either the ICD 9 or ICD 10 codes to classify heat illnesses depending on the year of  
34  
35 212 publication. Heat illnesses were categorised as heat stroke and other heat illnesses. Heat stroke  
36  
37 213 was defined using the ICD diagnosis codes 992.0 (ICD 9) and T67.0 (ICD 10). While other  
38  
39 214 heat illnesses were defined as heat exhaustion (992.3-5, T67 3-5) and unspecified effects of  
40  
41 215 heat and light (992.9 and T67.9). In addition, some studies presented findings for all heat illness  
42  
43 216 without categorizing them into heat stroke and other heat illnesses. These findings were  
44  
45 217 presented separately. Incidence rates and proportions were extracted from the data reported in  
46  
47 218 each study and used for the analysis in this review. Due to the heterogeneity of the included  
48  
49 219 studies, a meta-analysis was not conducted.  
50  
51  
52  
53  
54

55 220

56 221

57 222

## 223 **Results**

224 An initial search identified 3816 papers. After removing duplicates, screening titles and  
225 abstracts, 47 papers remained for full-text review with twenty-four (24) included in the  
226 systematic review (Figure 1). Twenty-two (22) of the reviewed articles originated from the  
227 United States of America (USA), while the other two studies were conducted in the United  
228 Kingdom (UK) and Israel respectively (Supplemental Table 2). All included studies were  
229 conducted among armed forces personnel, however, two studies included university staff and  
230 armed forces personnel in the studies.[27, 28] Twenty- one (21) articles examined heat illnesses  
231 and injuries in women and men. Seven (7) of these studies described all heat -related illnesses  
232 in men and women,[29-35] while 13 studies included information on heat stroke and other heat  
233 injuries in relation to both genders.[36-48] Four (4) studies identified gender-specific risk  
234 factors associated with heat stroke,[31, 34, 35, 49] and three (3) studies compared heat  
235 tolerance in men and women.[12, 27, 28]

### 236 **Incidence of heat stroke in women compared to men in the armed forces**

237 Thirteen studies conducted among US army personnel compared the incidence of heat stroke  
238 between men and women.[36 – 48] The incidence of heat stroke among females ranged from  
239 0.10 to 0.26 per 1000 person-years. Among males, the incidence of heat stroke ranged from  
240 0.22 to 0.48 per 1000 person years (Figure 2). Between 2015 and 2018, the incidence of heat  
241 stroke increased steadily for both men and women.

### 242 **Incidence of other heat illnesses in women compared to men in the armed forces**

243 The incidence of other heat illnesses was reported by 13 studies conducted by the US Army.  
244 [36 – 48] The incidence of other heat illnesses in women ranged from 1.30 to 2.89 per 1000  
245 person-years. In men, the incidence rate of other heat illness ranged from 0.98 to 1.98 per 1000  
246 person years (Figure 3).

1  
2  
3 **247 Incidence and prevalence of all heat illnesses in women compared to men**  
4

5  
6 248 Table 1 shows the proportions and incidences of all heat-related illness in men and women in  
7  
8 249 the armed forces. Five (5) studies reported higher incidences and proportions of all heat illness  
9  
10 250 in men compared to women[29, 31, 32, 34, 35] while two studies reported higher incidences  
11  
12  
13 251 of all heat illness in women.[30, 33]  
14  
15  
16  
17  
18  
19  
20  
21  
22  
23  
24  
25  
26  
27  
28  
29  
30  
31  
32  
33  
34  
35  
36  
37  
38  
39  
40  
41  
42  
43  
44  
45  
46  
47  
48  
49  
50  
51  
52  
53  
54  
55  
56  
57  
58  
59  
60

For peer review only



252 **Table 1: Incidence and Proportion of all heat related illnesses in women and men in the Armed Force**

| Reference, year                              | Country | Study design               | Study duration         | Population                                                                   | ICD codes               | All heat injuries |        |
|----------------------------------------------|---------|----------------------------|------------------------|------------------------------------------------------------------------------|-------------------------|-------------------|--------|
|                                              |         |                            |                        |                                                                              |                         | Women             | Men    |
| Dickson. 1994[29]                            | UK      | Descriptive epidemiology   | 1981-1991 (10yrs)      | Royal Air force, Royal Navy and Army (1448 cases)                            | ICD-9-CM: 992.0 – 992.9 | 11.43*            | 41.87* |
| Army Medical Surveillance Activity, 1998[30] | USA     | Descriptive epidemiology   | 1997 – 1998 (1 year)   | US Army (1433 cases) 1997                                                    | ICD-9-CM: 992.0 – 992.9 | 12.8†             | 8.6†   |
|                                              |         |                            |                        | 1998                                                                         |                         | 15.8†             | 12.0†  |
| Army Medical Surveillance Activity, 2000[33] | USA     | Descriptive epidemiology   | 1997 – 1999 (2 years)  | US Army and Marine Corps (3386 cases)                                        | ICD-9-CM: 992.0 – 992.9 |                   |        |
|                                              |         |                            |                        | Army (1896 cases)<br>Marine Corps (1104 cases)                               |                         | 2.0†              | 1.5†   |
| Army Medical Surveillance Activity, 2002[31] | USA     | Descriptive epidemiology   | 1990 – 1997 (7 years)  | US Army (2290 cases)                                                         | ICD-9-CM: 992.0 – 992.9 | 14.0%§            | 86.0%§ |
|                                              |         | Case-control               | 1998 – 2001 (3 years)  | US Army (5021 cases and 10,042 controls)                                     |                         | 20.7%§            | 79.3%§ |
| Army Medical Surveillance Activity, 2003[32] | USA     | Descriptive epidemiology   | 2002 (1 year)          | US Army (1816 cases)                                                         | ICD-9-CM: 992.0 – 992.9 | 3.5†              | 5.1†   |
| Carter et al, 2005[34]                       | USA     | Cross-sectional            | 1980 – 2002 (22 years) | US Army (5246 cases)                                                         | ICD-9-CM: 992.0 – 992.9 | 13.7%§            | 86.3%§ |
| Bedno et al, 2014[35]                        | USA     | Analytical cross-sectional | 2005 - 2006            | US Armed Forces (80 exertional heat illness cases)<br>9455 men<br>1913 women | ICD-9-CM: 992.0 – 992.9 | 0.680%            | 0.71%  |

253 § Proportions and incidences reported are of the total cases reported in the articles  
 254 \* Incidence rate reported per 100,000 person-years; † Incidence rate per 100,000 person- months; ‡ Incidence rate reported per 1000 person-years  
 255 UK = United Kingdom; USA = United States of America

## 256 Gender-specific risk factors for heat illness

257 Three (3) studies identified the gender-specific risk factors that were associated with heat  
 258 illness (Table 2). [31, 34, 49] Two of the studies compared the risk of heat illness between  
 259 males and females while one study identified risk factors within each gender. In the two studies  
 260 that compared the risk of heat illness by gender, females had a greater risk of experiencing heat  
 261 illness (OR 1.5, 95% CI 1.4 to 1.7 and IDR 1.21, 95% CI 1.09 to 1.40) compared to males.[31,  
 262 34] Within gender, males with body mass index (BMI) of  $\geq 26 \text{ kgm}^{-2}$  had a greater risk of  
 263 experiencing heat illness compared to males with BMI  $< 22 \text{ kgm}^{-2}$  (OR 2.10, 95% CI 1.59 to  
 264 2.78).[49] In addition, males with run times of  $\geq 12.9$  minutes had almost six times the risk of  
 265 exertional heat illness compared to males with run times of  $< 10.3$  minutes (OR 5.61, 95% CI  
 266 1.92 to 6.85). While females with run times of  $\geq 6.9$  minutes had five times the risk of  
 267 exertional heat illness compared to females with run times of  $< 5.8$  minutes (OR 5.30, 95% CI  
 268 1.59 to 17.64).[49]

269 **Table 2: Gender-specific risk factors associated with heat illness**

| Reference, year                              | Country | Study design and duration                    | Study population                                                                                  | Risk factors                                                                                                                | OR or IDR (95% CI)                                              |
|----------------------------------------------|---------|----------------------------------------------|---------------------------------------------------------------------------------------------------|-----------------------------------------------------------------------------------------------------------------------------|-----------------------------------------------------------------|
| Army Medical Surveillance Activity, 2002[31] | USA     | Case-control<br>1998 – 2001<br>(3 years)     | US Army<br>5021 cases and 10,042<br>controls                                                      | Female                                                                                                                      | 1.5 (1.4 - 1.7)                                                 |
| Carter et al, 2005[34]                       | USA     | Cross-sectional<br>1980 – 2002<br>(22 years) | US Army<br>5246 cases of heat illness;<br>4521 males and 725<br>females                           | Female                                                                                                                      | 1.21 (1.09 – 1.40)                                              |
| Wallace et al, 2006[49]                      | USA     | Case-control<br>1988 – 1996<br>(8 years)     | US Marine Corps<br>Male (627 cases and 1679<br>controls)<br>Female (49 cases and 123<br>controls) | BMI $\geq 26 \text{ kg/m}^2$ (males)<br>Run time $\geq 12.9$<br>minutes (males)<br>Run time $\geq 6.9$ minutes<br>(females) | 2.10 (1.59 – 2.78)<br>5.61 (3.73 – 8.45)<br>5.30 (1.59 – 17.64) |

270 Odds ratio; IDR = Incidence density ratio; BMI= Body Mass Index; CI=Confidence Interval; USA = United States of America

1  
2  
3 **271 Heat tolerance in women and men**  
4

5  
6 272 Three studies compared heat tolerance classification in males and females using the HTT  
7  
8 273 developed by the Israeli Defence Force (Table 3). [12, 27, 28] Druyan et al. investigated gender  
9  
10 274 differences in Israeli Defence Force personnel who had sustained heat injury. The study  
11  
12 275 reported that 67% of the women were found to be heat intolerant compared to 26% of their  
13  
14 276 male counterparts.[12] In the studies conducted by Lisman et al. and Kazman et al. the study  
15  
16 277 population comprised of participants from the university and military communities who had  
17  
18 278 either no heat illness or a previous history of heat illness. Both studies reported that a greater  
19  
20 279 proportion of women were classified as heat intolerant compared to men (42% vs 27% and  
21  
22 280 45% vs 18% respectively). [27, 28]  
23  
24  
25  
26  
27  
28  
29

30 **282 Table 3: Heat tolerance in women and men**  
31  
32

| Reference, year         | Country | Study design and duration                           | Study population                                                   | Heat in tolerance rate Women | Heat in tolerance rate Men |
|-------------------------|---------|-----------------------------------------------------|--------------------------------------------------------------------|------------------------------|----------------------------|
| Druyan et al, 2012[12]  | Israel  | Retrospective cross-sectional 2008 – 2010 (2 years) | 170 males and 9 females                                            | 66.67%                       | 25.79%                     |
| Lisman et al, 2014 [27] | USA     | Analytical cross-sectional (duration not stated)    | Military and university community members; 34 males and 12 females | 42%                          | 27%                        |
| Kazman et al, 2015[28]  | USA     | Analytical cross-sectional (duration not stated)    | Military and university community members; 55 males and 20 females | 45%                          | 18%                        |

33  
34  
35  
36  
37  
38  
39  
40  
41  
42  
43  
44  
45  
46  
47 283 USA = United States of America  
48  
49 284  
50  
51  
52 285  
53  
54  
55 286  
56  
57  
58 287  
59  
60

## 288 **Assessment of methodological quality**

289 The QATSDD scores ranged from 22.2% to 94.4% (Supplemental Table 3). Only six studies  
290 scored above 50% and included details about recruitment, data analysis, strengths and  
291 limitations of the research. The other studies had lower scores because they lacked detailed  
292 justification for the analytical methods, data collection, analysis, strengths and limitations.  
293 However, results of the methodological assessment should be interpreted with caution.  
294 Although the tool assesses methodological quality, it is more likely to be dependent on how  
295 the paper was written. In this review, 70% of the studies included were military reports on heat-  
296 related illnesses in the Armed Forces. These reports were published in a peer-reviewed journal  
297 and were retrospective analyses of data collected by Defence Medical Surveillance Systems.  
298 These studies may not have reported details about data collection, strengths and limitations,  
299 but they presented valid information on heat-related illness.

300

## 301 **Discussion**

302 The findings of this systematic review suggest that men have a slightly higher incidence of heat  
303 stroke compared to women. By contrast, women report a slightly higher incidence of other heat  
304 illness compared to men. In addition, among studies that reported all heat illnesses (where heat  
305 stroke and other heat illnesses have been combined), there was a higher rate of all heat illnesses  
306 in men compared to women as evidenced by the outcomes reported in five (5) of seven (7)  
307 studies. However, women had a greater risk of experiencing exertional heat illness and were  
308 more likely to be heat intolerant compared to men. Other gender-specific risk factors were  
309 longer run times for both men and women while higher BMI was associated with exertional  
310 heat illness for men only. However, the association between these factors and exertional heat  
311 illness is weak given the small number of articles that investigated the relationship.

1  
2  
3 312 Furthermore, despite the higher proportion of heat intolerance reported among women; this  
4  
5 313 finding should be interpreted with caution given the small sample size for females in the  
6  
7  
8 314 included studies and the differences in occupations of the women in the three studies. One  
9  
10 315 study included women in the armed forces with a previous history of heat stroke, [12] while  
11  
12 316 the other two studies recruited women from the general population as well as military members  
13  
14  
15 317 with either no history or a previous history of heat stroke. [27, 28]

### 18 318 **Incidence and prevalence of exertional heat illnesses in women compared to men**

20 319 In this review, women had a lower incidence of heat stroke, but a slightly higher incidence of  
21  
22 320 other heat illness compared to men. The reported lower incidence of heat stroke/higher  
23  
24 321 incidence of other heat illness in women compared to men could be because women in the  
25  
26 322 military in the United States were excluded from combat positions until 2013 when the ban  
27  
28 323 was lifted.[20] Evidence in the literature suggests that service members who were engaged in  
29  
30 324 roles such as infantry or gun crew had an increased risk of heat illness, possibly reflecting a  
31  
32 325 greater risk of heat illness for those in combat roles.[34] Furthermore, during military training  
33  
34 326 exercises, men may have comparatively tolerated working in the heat beyond the endurance  
35  
36 327 limits.[22] This finding was re-echoed in a previous systematic review that men in the general  
37  
38 328 population had a higher rate of all types of heat illnesses compared to women.[21] Although  
39  
40 329 the incidence of heat stroke was lower in women compared to men in this review, the incidence  
41  
42 330 of heat stroke among women has increased over the past four years. This implies that as more  
43  
44 331 women engage in specialised military roles their risk of exertional heat illness increases.

### 51 332 **Gender-specific risk factors for heat illness**

54 333 Despite the lower incidence of heat stroke, women had a greater risk of exertional heat illnesses  
55  
56 334 compared to men.[30, 33] In addition one study attempted to investigate intra gender risk  
57  
58 335 factors for exertional heat illness.[49] The slower run time duration was associated with  
59  
60

1  
2  
3 336 exertional heat illness among males and females respectively, while higher BMI was identified  
4  
5 337 as a risk factor among males only.[49] The higher risk of exertional heat illnesses in women  
6  
7 338 may likely be due to differences in physiological and physical characteristics between men and  
8  
9 339 women.[50] Physiological characteristics such as hormones, use of contraceptive pills and  
10  
11 340 lower evaporative heat loss may make women more susceptible to heat illness.[11, 13]  
12  
13 341 However, conflicting evidence suggests that in highly trained women, exercise performance  
14  
15 342 and heat loss is not affected by the menstrual cycle phase but is impaired in humid  
16  
17 343 conditions.[51] In addition, physical characteristics such as lower aerobic fitness is a predictor  
18  
19 344 of exertional heat illness.[50] Generally, women have lower aerobic fitness levels and lower  
20  
21 345 overall work capacity which may contribute to the increased risk of exertional heat illness.[50]  
22  
23 346 Individuals with low aerobic fitness levels are likely to exert themselves beyond their physical  
24  
25 347 limit and are at increased risk of heat illness.[52] Other intra gender risk factors that were  
26  
27 348 identified were longer run time duration and higher BMI.[49] Evidence suggests that slower  
28  
29 349 run time duration which may be a reflection of lower aerobic fitness and higher BMI increases  
30  
31 350 the risk of heat illness.[49, 53] However, the evidence is limited given that this was reported  
32  
33 351 by only one study.[49]

#### 352 **Heat tolerance in women and men**

353 The risk of heat illness is dependent on thermal tolerance.[2] To determine the recovery and  
354 return to duty for HTT is conducted for members of the armed forces after a heat stroke  
355 event.[18] The test criteria define heat intolerance as peak rectal temperature > 38.5°C, peak  
356 heart rate > 150 bpm, or the inability of these values to reach a plateau.[18, 19] Although, in  
357 the three studies, a higher proportion of women were classified as heat intolerant; this evidence  
358 should be interpreted with caution given that the female populations included in each study  
359 varied with respect to heat illness and occupations.[12, 27, 28] However, the studies  
360 acknowledged that gender differences in cardiorespiratory fitness, body fat percentage and

1  
2  
3 361 surface area to mass ratio may account for the higher intolerance rates in women.[12, 27, 28]  
4  
5 362 In addition, the three studies reported using the Israeli Defence Force heat tolerance test  
6  
7  
8 363 protocol and given that the test protocol was developed using male participants, there may be  
9  
10 364 a need to re-evaluate the criteria for women to reduce false-positive results.[12, 27, 28]  
11  
12 365 Furthermore, incomplete recovery and inaccurate determination of return to duty may  
13  
14 366 negatively affect military operations and may end the careers of armed forces personnel.[14]  
15  
16  
17 367 Therefore, it is important to ensure that the heat tolerance test is valid and fair for females if it  
18  
19 368 is to be used to determine return to duty for females in the armed forces.  
20  
21

### 22 369 **Strengths and limitations**

23  
24  
25 370 To the authors' current knowledge, this is the first known systematic review investigating  
26  
27 371 gender differences in exertional heat illness and heat tolerance in the armed forces. In addition,  
28  
29 372 we identified potential gender-specific risk factors that are associated with exertional heat  
30  
31 373 illness. However, the heterogeneity in the study designs contributed to the variable  
32  
33 374 methodological quality of the included studies. Most of the articles in this review were military  
34  
35 375 reports and may not be considered of high methodological quality when assessed using a formal  
36  
37 376 critical appraisal tool. Also, most of the included studies utilized retrospective data as the data  
38  
39 377 source with an increased likelihood of incompleteness and inaccuracy. There is a likelihood  
40  
41 378 that misclassification bias could have been introduced into the studies. Three studies that  
42  
43 379 explored the risk factors associated with heat-related illness used retrospective data. [31, 34,  
44  
45 380 49] The retrospective data may have been misclassified or incomplete at the time of entry and  
46  
47 381 may have introduced misclassification bias into the studies. This type of bias may  
48  
49 382 underestimate or overestimate the association between heat-related illness and risk factors.  
50  
51 383 Although the gender-specific risk factors associated with heat illness were discussed; the  
52  
53 384 review provided limited evidence of these factors, given the few numbers of studies that  
54  
55  
56  
57  
58  
59  
60

1  
2  
3 385 investigated the association. Furthermore, we included only studies published in English  
4  
5 386 language; studies published in other languages were excluded.  
6  
7

### 8 387 **Implication for policy and future research**

10  
11 388 This systematic review demonstrates that there is limited research on exertional heat illness in  
12  
13 389 women in the armed forces. Although men had a higher incidence of heat stroke; women had  
14  
15 390 a higher incidence of other heat illnesses. Further research is needed to establish if this reflects  
16  
17 391 physiological or behavioural differences. In addition, the limited and inconclusive evidence  
18  
19 392 suggests that more women were classified as heat intolerant compared to men using the Israeli  
20  
21 393 Defence Force heat tolerance test protocol. The current criteria may be unfair to women given  
22  
23 394 that it was developed using male participants. More research is needed to determine the gender  
24  
25 395 differences in heat tolerance as well as to consider re-evaluating the heat tolerance test protocol  
26  
27 396 or the development of a new protocol that considers gender-specific factors.[12] Given that the  
28  
29 397 heat tolerance test was conducted in a laboratory setting, more research is needed to replicate  
30  
31 398 the findings in field based setting.  
32  
33  
34  
35

### 36 37 399 **Conclusion**

38  
39  
40 400 In conclusion, this review suggests that men had a slightly higher incidence of heat stroke but  
41  
42 401 women in the armed forces may have a greater risk of exertional heat illness. However, the  
43  
44 402 current evidence is limited, and further research is required to investigate the influence of  
45  
46 403 gender differences on heat tolerance and heat illness. In addition, further research is needed to  
47  
48 404 evaluate the heat tolerance test protocol for women.  
49  
50  
51

### 52 405 **Authors' contribution**

53  
54 406 All authors contributed substantially to the study concept, design, data extraction, quality  
55  
56 407 assessment and writing of the manuscript.  
57

58 408 **Conceptualization:** Faith O. Alele, Bunmi S. Malau-Aduli, Aduli E. Malau-Aduli, Melissa  
59 409 Crowe  
60



1  
2  
3 410 **Methodology:** Faith O. Alele, Bunmi S. Malau-Aduli, Aduli E. Malau-Aduli, Melissa Crowe

4  
5 411 **Writing** - Original draft: Faith O. Alele

6  
7 412 **Writing – review & editing:** Faith O. Alele, Bunmi S. Malau-Aduli, Aduli E. Malau-Aduli,  
8 413 Melissa Crowe

9  
10 414 All authors read and approved the manuscript for submission.

11  
12 415 **Funding:** The first author (FA) is supported by the Australian Government International  
13 416 Research Training Program Scholarship

14  
15 417 **Competing Interests:** The authors declare that they have no competing interests.

16  
17 418 **Patient consent for publication:** Not required

18  
19 419 **Data sharing statement:** There are no additional or unpublished data available.

20  
21 420

22  
23 421

24  
25 422 **References**

- 26  
27 423 1. Becker JA, Stewart LK. Heat-related illness. *Am Fam Phys* 2011;83(11):1325-  
28 424 1330.
- 29 425 2. Epstein Y. Heat intolerance: Predisposing factor or residual injury? *Med Sci Sports*  
30 426 *Exerc* 1990;22(1):29-35.
- 31 427 3. Grubenhoff JA, du Ford K, Roosevelt GE. Heat-related illness. *Clin Pediatr Emerg*  
32 428 *Med* 2007;8(1):59-64.
- 33 429 4. Mehta SR, Jaswal DS. Heat Stroke. *Med J Armed Forces India* 2003;59(2):140-3.
- 34 430 5. Xiang J, Peng B, Pisaniello D, Hansen A. Health impacts of workplace heat  
35 431 exposure: an epidemiological review. *Ind Health* 2014;52(2):91-101.
- 36 432 6. Xiang J, Hansen A, Pisaniello D, Bi P. Extreme heat and occupational heat illnesses  
37 433 in South Australia, 2001–2010. *Occup Environ Med* 2015; 72:580-586  
38 434 doi:10.1136/oemed-2014-102706 [published Online First 18 June 2015].
- 39 435 7. Epstein Y, Druyan A, Heled Y. Heat injury prevention—a military perspective. *The*  
40 436 *J Strength Cond Res* 2012; 26:82-6.
- 41 437 8. McCristall P, Baggaley K. The progressions of a gendered military: A theoretical  
42 438 examination of gender inequality in the Canadian military. *J Mil Veteran Fam*  
43 439 *Health*. 2019;5(1):119-26.
- 44 440 9. Kazman JB, Heled Y, Lisman PJ, Druyan A, Deuster PA, O’Connor FG. Exertional  
45 441 Heat Illness: The Role of Heat Tolerance Testing. *Curr Sports Med Rep*  
46 442 2013;12(2):101-5.
- 47 443 10. Kenney WL. A review of comparative responses of men and women to heat stress.  
48 444 *Environ Res* 1985;37(1):1-11.
- 49 445 11. Shapiro Y, Pandolf KB, Avellini BA, Pimental NA, Goldman RF. Physiological  
50 446 responses of men and women to humid and dry heat. *J Appl Physiol* 1980;49(1):1-  
51 447 8.
- 52 448 12. Druyan A, Makranz C, Moran D, Yanovich R, Epstein Y, Heled Y. Heat tolerance  
53 449 in women-Reconsidering the criteria. *Aviat Space Environ Med* 2012;83(1):58-60.

- 1  
2  
3 450 13. Tenaglia SA, McLellan TM, Klentrou PP. Influence of menstrual cycle and oral  
4 451 contraceptives on tolerance to uncompensable heat stress. *Eur J Appl Physiol Occup*  
5 452 *Physiol* 1999;80(2):76-83.
- 7 453 14. O'Connor FG, Heled Y, Deuster PA. Exertional heat stroke, the return to play  
8 454 decision, and the role of heat tolerance testing: a clinician's dilemma. *Curr Sport*  
9 455 *Med Rep*. 2018;17(7):244-8.
- 11 456 15. O'Connor FG, Casa DJ, Bergeron MF, Carter III R, Deuster P, Heled Y, Kark J,  
12 457 Leon L, MCDermott B, O'Brien K, Roberts WO. American College of Sports  
13 458 Medicine Roundtable on exertional heat stroke-return to duty/return to play:  
14 459 conference proceedings. *Curr Sport Med Rep*. 2010;9(5):314-21.
- 16 460 16. McDermott BP, Casa DJ, Yeargin SW, Ganio MS, Armstrong LE, Maresh CM.  
17 461 Recovery and return to activity following exertional heat stroke: considerations for  
18 462 the sports medicine staff. *J Sport Rehabil*. 2007;16(3):163-81.
- 19 463 17. Department of the Army. Standards of Medical Fitness. Army Regulation 40–  
20 464 501.2019: 30 - 32
- 22 465 18. Moran DS, Heled Y, Still L, Laor A, Shapiro Y. Assessment of heat tolerance for  
23 466 post exertional heat stroke individuals. *Med Sci Monit* 2004;10(6):Cr252-7.
- 24 467 19. Shapiro Y, Magazanik A, Udassin R, Ben-Baruch G, Shvartz E, Shoenfeld Y. Heat  
25 468 intolerance in former heatstroke patients. *Ann Intern Med* 1979;90(6):913-6.
- 27 469 20. Nindl BC, Jones BH, Van Arsdale SJ, Kelly K, Kraemer WJ. Operational physical  
28 470 performance and fitness in military women: physiological, musculoskeletal injury,  
29 471 and optimized physical training considerations for successfully integrating women  
30 472 into combat-centric military occupations. *Mil Med* 2016;181(suppl\_1):50-62.
- 32 473 21. Gifford RM, Todisco T, Stacey M, Fujisawa T, Allerhand M, Woods DR, et al. Risk  
33 474 of heat illness in men and women: A systematic review and meta-analysis. *Environ*  
34 475 *Res* 2019;171:24-35.
- 35 476 22. Hunt AP, Billing DC, Patterson MJ, Caldwell JN. Heat strain during military  
36 477 training activities: The dilemma of balancing force protection and operational  
37 478 capability. *Temp* 2016;3(2):307-17.
- 39 479 23. Moher D, Liberati A, Tetzlaff J, Altman DG. Preferred reporting items for  
40 480 systematic reviews and meta-analyses: the PRISMA statement. *Ann Intern Med*.  
41 481 2009;151 (4):264-9
- 43 482 24. Sirriyeh R, Lawton R, Gardner P, Armitage G. Reviewing studies with diverse  
44 483 designs: the development and evaluation of a new tool. *J Eval Clin Pract*  
45 484 2012;18(4):746-52.
- 46 485 25. World Health Organization. International statistical classification of diseases and  
47 486 related health problems.10th revision version for 2016. 2016 (Accessed August 20,  
48 487 2019). Available at <https://apps.who.int/iris/handle/10665/39473>
- 50 488 26. World Health Organization. International statistical classification of diseases and  
51 489 related health problems.10th revision version for 2016. 2016 (Accessed August 20,  
52 490 2019). Available at <https://icd.who.int/browse10/2016/en>
- 54 491 27. Lisman P, Kazman JB, O'Connor FG, Heled Y, Deuster PA. Heat tolerance testing:  
55 492 association between heat intolerance and anthropometric and fitness measurements.  
56 493 *Mil Med*. 2014 Nov 1;179(11):1339-46.

- 1  
2  
3 494 28. Kazman JB, Purvis DL, Heled Y, Lisman P, Atias D, Van Arsdale S, et al. Women  
4 495 and exertional heat illness: identification of gender-specific risk factors. *US Army*  
5 496 *Med Dep J* 2015;58-66.
- 7 497 29. Dickinson JG. Heat illness in the services. *J R Army Med Corps* 1994;140(1):7-12.  
8 498 30. Army Medical Surveillance Activity. Reported heat and cold injuries, United States  
9 499 Army, January 1997 - December 1997. *MSMR* 1998;4(1):16.
- 11 500 31. Army Medical Surveillance Activity. Heat-associated injuries, US Army 1991-  
12 501 2002. *MSMR* 2002;8(4):2-7.
- 13 502 32. Army Medical Surveillance Activity. Heat-related injuries, US Army, 2002.  
14 503 *MSMR* 2003;9(4):2-4.
- 16 504 33. Army Medical Surveillance Activity. Heat-related injuries among active duty  
17 505 soldiers and Marines, 1997-1999. *MSMR* 2000;6(3):2-3.
- 18 506 34. Carter Iii R, Chevront SN, Williams JO, Kolka MA, Stephenson LA, Sawka MN,  
19 507 et al. Epidemiology of hospitalizations and deaths from heat illness in soldiers. *Med*  
20 508 *Sci Sports Exerc* 2005;37(8):1338-44.
- 22 509 35. Bedno SA, Urban N, Boivin MR, Cowan DN. Fitness, obesity and risk of heat  
23 510 illness among army trainees. *Occup Med (Lond)* 2014;64(6):461-7.
- 24 511 36. Army Medical Surveillance Activity. Heat-related injuries, U.S. Army, 2005.  
25 512 *MSMR* 2006;12(5):2-4.
- 27 513 37. Armed Forces Health Surveillance Branch. Heat-related Injuries, U.S. Armed  
28 514 Forces, 2006. *MSMR* 2007;14(2):14-5.
- 29 515 38. Armed Forces Health Surveillance Branch. Update: Heat injuries among U.S.  
30 516 military members, 2007. *MSMR* 2008;15(2):2-3.
- 32 517 39. Armed Forces Health Surveillance Branch. Update: Heat injuries among active  
33 518 component members, U.S. Armed Forces, 2008. *MSMR* 2009;16(3):8-9.
- 34 519 40. Armed Forces Health Surveillance Branch. Update: Heat injuries, active  
35 520 component, U.S. Armed Forces, 2009. *MSMR* 2010;17(3):6-8.
- 37 521 41. Armed Forces Health Surveillance Branch. Update: Heat injuries, active  
38 522 component, U.S. Armed Forces, 2010. *MSMR* 2011;18(3):6-8.
- 39 523 42. Armed Forces Health Surveillance Branch. Update: Heat injuries, active  
40 524 component, U.S. Armed Forces, 2011. *MSMR* 2012;19(3):13-5.
- 42 525 43. Armed Forces Health Surveillance Branch. Update: Heat injuries, active  
43 526 component, U.S. Armed Forces, 2012. *MSMR* 2013;20(3):17-20.
- 44 527 44. Armed Forces Health Surveillance Branch. Update: Heat injuries, active  
45 528 component, U.S. Armed Forces, 2013. *MSMR* 2014;21(3):10-3.
- 47 529 45. Armed Forces Health Surveillance Branch. Update: Heat injuries, active  
48 530 component, U.S. Armed Forces, 2014. *MSMR* 2015;22(3):17-20.
- 49 531 46. Armed Forces Health Surveillance Branch. Update: Heat injuries, active  
50 532 component, U.S. Army, Navy, Air Force, and Marine Corps, 2015. *MSMR*  
51 533 2016;23(3):16-9.
- 53 534 47. Armed Forces Health Surveillance Branch. Update: Heat Illness, Active  
54 535 Component, U.S. Armed Forces, 2016. *MSMR* 2017;24(3):9-13.
- 55 536 48. Armed Forces Health Surveillance Branch. Update: Heat illness, active component,  
56 537 U.S. Armed Forces, 2017. *MSMR* 2018;25(4):6-12.
- 58  
59  
60

- 1  
2  
3 538 49. Wallace RF, Kriebel D, Punnett L, Wegman DH, Wenger C, Gardner JW, et al.  
4 539 Risk factors for recruit exertional heat illness by gender and training period. *Aviat*  
5 540 *Space Environ Med* 2006;77(4):415-21.  
6  
7 541 50. Epstein Y, Yanovich R, Moran DS, Heled Y. Physiological employment standards  
8 542 IV: integration of women in combat units physiological and medical considerations.  
9 543 *Eur J Appl Physiol* 2013;113(11):2673-90.  
10  
11 544 51. Lei, Tze-Huan et al. "Influence of menstrual phase and arid vs. humid heat stress  
12 545 on autonomic and behavioural thermoregulation during exercise in trained but  
13 546 unacclimated women. *J Physiol* 2017; 595(9):2823-2837.  
14 547 52. Cleary M. Predisposing risk factors on susceptibility to exertional heat illness:  
15 548 clinical decision-making considerations. *J Sport Rehabil* 2007;16(3):204-14.  
16  
17 549 53. Selkirk GA, McLellan TM. Influence of aerobic fitness and body fatness on  
18 550 tolerance to uncompensable heat stress. *J Appl Physiol* 2001;91(5):2055-63.  
19 551

## 552 **Figure legends**

553 Figure 1: PRISMA flow chart of the study selection protocol

554 Figure 2: The incidence rate of exertional heat stroke between men and women in the armed  
555 forces from 2006 to 2018

556 Figure 3: Incidence rate of other heat illnesses (including heat exhaustion and unspecified  
557 effects of heat and light) between men and women in the armed forces from 2006 to 2018

558  
559  
560  
561



Figure 1: PRISMA flow chart of the study selection protocol

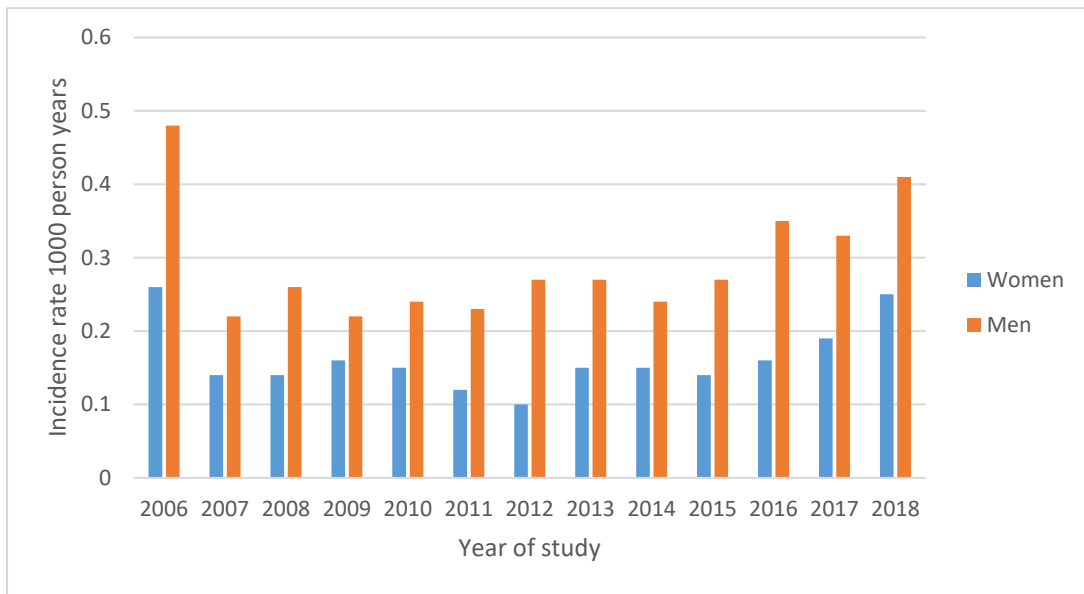

Figure 2

Peer review only

1  
2  
3  
4  
5  
6  
7  
8  
9  
10  
11  
12  
13  
14  
15  
16  
17  
18  
19  
20  
21  
22  
23  
24  
25  
26  
27  
28  
29  
30  
31  
32  
33  
34  
35  
36  
37  
38  
39  
40  
41  
42  
43  
44  
45  
46  
47  
48  
49  
50  
51  
52  
53  
54  
55  
56  
57  
58  
59  
60

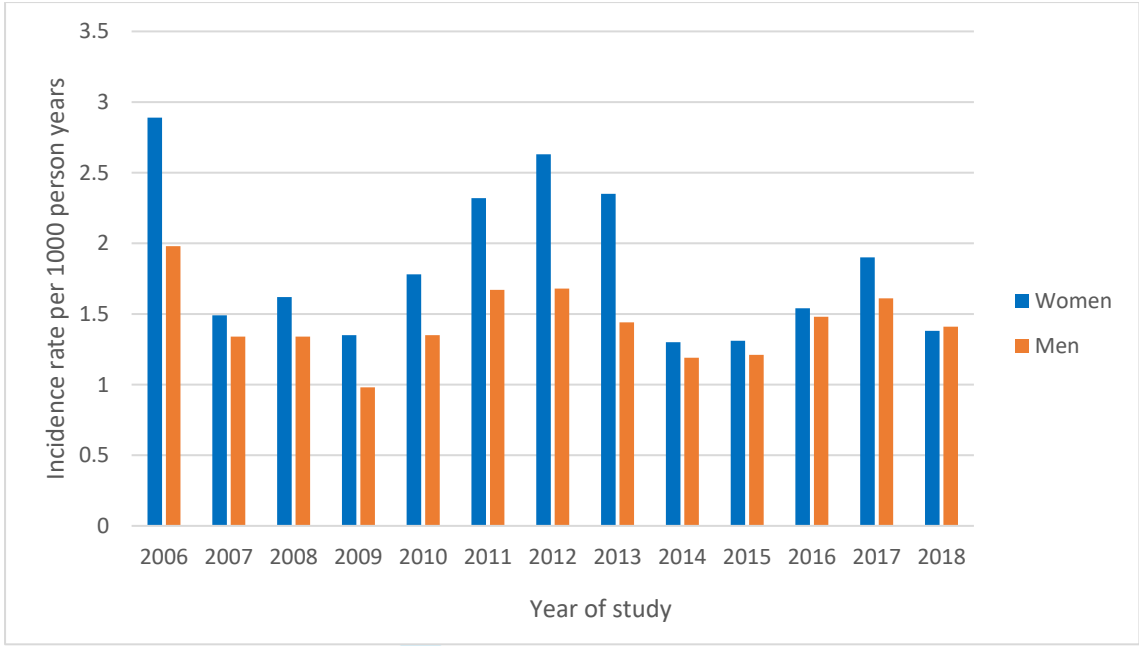

Figure 3

peer review only

1  
2  
3  
4  
5  
6  
7  
8  
9  
10  
11  
12  
13  
14  
15  
16  
17  
18  
19  
20  
21  
22  
23  
24  
25  
26  
27  
28  
29  
30  
31  
32  
33  
34  
35  
36  
37  
38  
39  
40  
41  
42  
43  
44  
45  
46  
47  
48  
49  
50  
51  
52  
53  
54  
55  
56  
57  
58  
59  
60

## Supplemental Table 1

| Medline search strategy |                                                                                                                                                                                                 |
|-------------------------|-------------------------------------------------------------------------------------------------------------------------------------------------------------------------------------------------|
| 1.                      | Women (MeSH)                                                                                                                                                                                    |
| 2.                      | Gender expression                                                                                                                                                                               |
| 3.                      | Gender identity (MeSH)                                                                                                                                                                          |
| 4.                      | Gender                                                                                                                                                                                          |
| 5.                      | Wom\$                                                                                                                                                                                           |
| 6.                      | Sex                                                                                                                                                                                             |
| 7.                      | Heat strok*                                                                                                                                                                                     |
| 8.                      | Heatstrok*                                                                                                                                                                                      |
| 9.                      | Heat collapse                                                                                                                                                                                   |
| 10.                     | Heat exhaustion                                                                                                                                                                                 |
| 11.                     | Heat prostration                                                                                                                                                                                |
| 12.                     | Heat cramp                                                                                                                                                                                      |
| 13.                     | Heat cramps                                                                                                                                                                                     |
| 14.                     | Heat stress disorder                                                                                                                                                                            |
| 15.                     | Heat stress disorders (MeSH)                                                                                                                                                                    |
| 16.                     | Thermal stress                                                                                                                                                                                  |
| 17.                     | Heat illness                                                                                                                                                                                    |
| 18.                     | Heat illnesses                                                                                                                                                                                  |
| 19.                     | Heat injury                                                                                                                                                                                     |
| 20.                     | Heat injuries                                                                                                                                                                                   |
| 21.                     | Heat related diseases                                                                                                                                                                           |
| 22.                     | Heat disorder                                                                                                                                                                                   |
| 23.                     | Heat disorders                                                                                                                                                                                  |
| 24.                     | Heat related disorder                                                                                                                                                                           |
| 25.                     | Heat related disorders                                                                                                                                                                          |
| 26.                     | Heat related illness                                                                                                                                                                            |
| 27.                     | Heat related illnesses                                                                                                                                                                          |
| 28.                     | Heat related injuries                                                                                                                                                                           |
| 29.                     | Heat related injury                                                                                                                                                                             |
| 30.                     | Environmental heat illness                                                                                                                                                                      |
| 31.                     | Heat stress                                                                                                                                                                                     |
| 32.                     | Heat adaptation                                                                                                                                                                                 |
| 33.                     | Heat tolerance                                                                                                                                                                                  |
| 34.                     | Heat tolerances                                                                                                                                                                                 |
| 35.                     | Heat resistance                                                                                                                                                                                 |
| 36.                     | Thermal resistance                                                                                                                                                                              |
| 37.                     | Thermoresistance                                                                                                                                                                                |
| 38.                     | Thermotolerance (MeSH)                                                                                                                                                                          |
| 39.                     | Heat endurance                                                                                                                                                                                  |
| 40.                     | 1 OR 2 OR 3 OR 4 OR 5 OR 6                                                                                                                                                                      |
| 41.                     | 7 OR 8 OR 9 OR 10 OR 11 OR 12 OR 13 OR 14 OR 15 OR 16 OR 17 OR 18 OR 19 OR 20 OR 21 OR 22 OR 23 OR 24 OR 25 OR 26 OR 27 OR 28 OR 29 OR 30 OR 31 OR 32 OR 33 OR 34 OR 35 OR 36 OR 37 OR 38 OR 39 |
| 42.                     | 40 AND 41                                                                                                                                                                                       |



**Supplemental Table 2**  
**Summary of all included studies**

| Reference, year                              | Country | Study design and duration                                                    | Population                                                                                                                               | Study findings <sup>§</sup>                                                                                                                                                                                                     |
|----------------------------------------------|---------|------------------------------------------------------------------------------|------------------------------------------------------------------------------------------------------------------------------------------|---------------------------------------------------------------------------------------------------------------------------------------------------------------------------------------------------------------------------------|
| Dickson. G, 1994[29]                         | UK      | Descriptive epidemiology<br>1981-1991                                        | Royal Airforce, Royal Navy and Army;<br>1448 all heat injuries cases <sup>¶</sup>                                                        | <b>Women</b><br>All heat injuries: 11.43 <sup>#</sup><br><b>Men</b><br>All heat injuries: 41.87 <sup>#</sup>                                                                                                                    |
| Army Medical Surveillance Activity, 1998[30] | USA     | Descriptive epidemiology;<br>1997 - 1998                                     | US Army;<br>1433 all heat injuries cases (1997-1998) <sup>¶</sup><br>1997<br><br>1998                                                    | <b>Women</b><br>All heat injuries: 12.8 <sup>‡</sup><br><br><b>Men</b><br>All heat injuries: 8.6 <sup>‡</sup><br><br><b>Women</b><br>All heat injuries: 15.8 <sup>‡</sup><br><b>Men</b><br>All heat injuries: 12.0 <sup>‡</sup> |
| Army Medical Surveillance Activity, 2000[33] | USA     | Descriptive epidemiology;<br>1997 - 1999                                     | US Army and Marine Corps; 3386 all heat injuries cases <sup>¶</sup><br><br>Army (1896 cases)<br><br>Marine Corps (1104 cases)            | <b>Women</b><br>All heat injuries: 2.0 <sup>†</sup><br><br><b>Men</b><br>All heat injuries: 1.5 <sup>†</sup><br><b>Women</b><br>All heat injuries: 4.4 <sup>†</sup><br><b>Men</b><br>All heat injuries: 2.0 <sup>†</sup>        |
| Army Medical Surveillance Activity, 2002[31] | USA     | Descriptive epidemiology<br>1990 - 1997<br><br>Case – control<br>1998 - 2001 | US Army;<br>2290 all heat injuries cases <sup>¶</sup><br><br>US Army;<br>5021 cases and 10,042 controls (all heat injuries) <sup>¶</sup> | <b>Women</b><br>All heat injuries: 14.0%<br><br><b>Men</b><br>All heat injuries: 86.0%<br><br><b>Women</b><br>All heat injuries: 20.7%<br><br><b>Men</b><br>All heat injuries: 79.3%                                            |

|    |                                                   |     |                                |                                                                                             |
|----|---------------------------------------------------|-----|--------------------------------|---------------------------------------------------------------------------------------------|
|    |                                                   |     |                                | <b>Risk factors</b><br>Female: OR; 1.5 (1.4 - 1.7)                                          |
| 5  | Army Medical Surveillance Activity, 2003[32]      | USA | Descriptive epidemiology; 2002 | US Army; 1816 all heat injuries cases <sup>†</sup>                                          |
| 6  |                                                   |     |                                | <b>Women</b><br>All heat injuries: 3.5 <sup>†</sup>                                         |
| 7  |                                                   |     |                                | <b>Men</b><br>All heat injuries: 5.1 <sup>†</sup>                                           |
| 10 | Carter et al, 2005[34]                            | USA | Cross-sectional 1980 - 2002    | US Army; 5246 all heat injuries cases <sup>†</sup><br>4521 males and 725 females            |
| 11 |                                                   |     |                                | <b>Women</b><br>All heat injuries: 13.7%                                                    |
| 12 |                                                   |     |                                | <b>Men</b><br>All heat injuries: 86.3%                                                      |
| 13 |                                                   |     |                                | <b>Risk factors</b><br>Female: IDR: 1.21 (1.09 – 1.40)                                      |
| 16 | Army Medical Surveillance Activity, 2006[36]      | USA | Descriptive epidemiology; 2005 | US Armed Forces; 204 heat stroke cases<br>958 heat exhaustion cases                         |
| 17 |                                                   |     |                                | <b>Women</b><br>Heat stroke: 0.26 <sup>†</sup><br>Heat exhaustion: 2.89 <sup>†</sup>        |
| 18 |                                                   |     |                                | <b>Men</b><br>Heat stroke: 0.48 <sup>†</sup><br>Heat exhaustion: 1.98 <sup>†</sup>          |
| 22 | Wallace et al, 2005[49]                           | USA | Case-control 1988 - 1996       | US Army; 5246 cases of heat illness;<br>4521 males and 725 females                          |
| 23 |                                                   |     |                                | <b>Risk factors</b><br><b>Females</b><br>Run time ≥ 6.9 minutes:<br>OR; 5.30 (1.59 – 17.64) |
| 24 |                                                   |     |                                | <b>Males</b><br>Run time ≥ 12.9 minutes:<br>OR; 5.61 (3.73 – 8.45)                          |
| 25 |                                                   |     |                                | BMI ≥ 26 kg/m <sup>2</sup> :<br>OR; 2.10 (1.59 – 2.78)                                      |
| 30 | Armed Forces Health Surveillance Branch, 2007[37] | USA | Descriptive epidemiology; 2006 | US Armed Forces; 259 heat stroke cases<br>1854 heat exhaustion cases                        |
| 31 |                                                   |     |                                | <b>Women</b><br>Heat stroke: 0.14 <sup>†</sup><br>Heat exhaustion: 1.49 <sup>†</sup>        |
| 32 |                                                   |     |                                | <b>Men</b><br>Heat stroke: 0.22 <sup>†</sup><br>Heat exhaustion: 1.34 <sup>†</sup>          |
| 36 | Armed Forces Health Surveillance Branch, 2008[38] | USA | Descriptive epidemiology; 2007 | US Armed Forces; 329 heat stroke cases<br>1853 heat exhaustion cases                        |
| 37 |                                                   |     |                                | <b>Women</b><br>Heat stroke: 0.14 <sup>†</sup><br>Heat exhaustion: 1.62 <sup>†</sup>        |
| 38 |                                                   |     |                                | <b>Men</b>                                                                                  |

1  
2  
3  
4  
5  
6  
7  
8  
9  
10  
11  
12  
13  
14  
15  
16  
17  
18  
19  
20  
21  
22  
23  
24  
25  
26  
27  
28  
29  
30  
31  
32  
33  
34  
35  
36  
37  
38  
39  
40  
41  
42  
43  
44  
45  
46

Heat stroke: 0.26†  
Heat exhaustion: 1.34†

---

|                                                   |     |                                |                                                                      |                                                                                                                                          |
|---------------------------------------------------|-----|--------------------------------|----------------------------------------------------------------------|------------------------------------------------------------------------------------------------------------------------------------------|
| Armed Forces Health Surveillance Branch, 2009[39] | USA | Descriptive epidemiology; 2008 | US Armed Forces; 299 heat stroke cases<br>1467 heat exhaustion cases | <b><u>Women</u></b><br>Heat stroke: 0.16†<br>Heat exhaustion: 1.35†<br><b><u>Men</u></b><br>Heat stroke: 0.22†<br>Heat exhaustion: 1.78† |
|---------------------------------------------------|-----|--------------------------------|----------------------------------------------------------------------|------------------------------------------------------------------------------------------------------------------------------------------|

---

|                                                   |     |                                |                                                                           |                                                                                                                                                  |
|---------------------------------------------------|-----|--------------------------------|---------------------------------------------------------------------------|--------------------------------------------------------------------------------------------------------------------------------------------------|
| Armed Forces Health Surveillance Branch, 2010[40] | USA | Descriptive epidemiology; 2009 | US Armed Forces; 323 heat stroke cases<br>2038 other heat injuries cases* | <b><u>Women</u></b><br>Heat stroke: 0.15†<br>Other heat injuries: 1.78†<br><b><u>Men</u></b><br>Heat stroke: 0.24†<br>Other heat injuries: 1.35† |
|---------------------------------------------------|-----|--------------------------------|---------------------------------------------------------------------------|--------------------------------------------------------------------------------------------------------------------------------------------------|

---

|                                                   |     |                                |                                                                           |                                                                                                                                                  |
|---------------------------------------------------|-----|--------------------------------|---------------------------------------------------------------------------|--------------------------------------------------------------------------------------------------------------------------------------------------|
| Armed Forces Health Surveillance Branch, 2011[41] | USA | Descriptive epidemiology; 2010 | US Armed Forces; 311 heat stroke cases<br>2576 other heat injuries cases* | <b><u>Women</u></b><br>Heat stroke: 0.12†<br>Other heat injuries: 2.32†<br><b><u>Men</u></b><br>Heat stroke: 0.23†<br>Other heat injuries: 1.67† |
|---------------------------------------------------|-----|--------------------------------|---------------------------------------------------------------------------|--------------------------------------------------------------------------------------------------------------------------------------------------|

---

|                                                   |     |                                |                                                                           |                                                                                                                                                  |
|---------------------------------------------------|-----|--------------------------------|---------------------------------------------------------------------------|--------------------------------------------------------------------------------------------------------------------------------------------------|
| Armed Forces Health Surveillance Branch, 2012[42] | USA | Descriptive epidemiology; 2011 | US Armed Forces; 362 heat stroke cases<br>2652 other heat injuries cases* | <b><u>Women</u></b><br>Heat stroke: 0.10†<br>Other heat injuries: 2.63†<br><b><u>Men</u></b><br>Heat stroke: 0.27†<br>Other heat injuries: 1.68† |
|---------------------------------------------------|-----|--------------------------------|---------------------------------------------------------------------------|--------------------------------------------------------------------------------------------------------------------------------------------------|

---

|                        |        |                                           |                                                 |                                                                                                                                                          |
|------------------------|--------|-------------------------------------------|-------------------------------------------------|----------------------------------------------------------------------------------------------------------------------------------------------------------|
| Druyan et al, 2012[12] | Israel | Retrospective cross-sectional 2008 – 2010 | Israeli Defence Forces; 170 males and 9 females | <b><u>Heat tolerance parameters</u></b><br><b><u>Women</u></b><br>Heat intolerance rate: 66.6%<br><br><b><u>Men</u></b><br>Heat intolerance rate: 25.79% |
|------------------------|--------|-------------------------------------------|-------------------------------------------------|----------------------------------------------------------------------------------------------------------------------------------------------------------|

---

|                                                   |     |                                |                                                                           |                                                                                                                                                  |
|---------------------------------------------------|-----|--------------------------------|---------------------------------------------------------------------------|--------------------------------------------------------------------------------------------------------------------------------------------------|
| Armed Forces Health Surveillance Branch, 2013[43] | USA | Descriptive epidemiology; 2012 | US Armed Forces; 365 heat stroke cases<br>2257 other heat injuries cases* | <b><u>Women</u></b><br>Heat stroke: 0.15†<br>Other heat injuries: 2.35†<br><b><u>Men</u></b><br>Heat stroke: 0.27†<br>Other heat injuries: 1.44† |
|---------------------------------------------------|-----|--------------------------------|---------------------------------------------------------------------------|--------------------------------------------------------------------------------------------------------------------------------------------------|

---

|                                                   |     |                                |                                                                           |                                                                                                                                                     |
|---------------------------------------------------|-----|--------------------------------|---------------------------------------------------------------------------|-----------------------------------------------------------------------------------------------------------------------------------------------------|
| Armed Forces Health Surveillance Branch, 2014[44] | USA | Descriptive epidemiology; 2013 | US Armed Forces; 324 heat stroke cases<br>1701 other heat injuries cases* | <b><u>Women</u></b><br>Heat stroke: 0.15†<br>Other heat injuries: 1.30†<br><b><u>Men</u></b><br>Heat stroke: 0.24†<br>Other heat injuries: 1.19†    |
| Bedno et al, 2014[35]                             | USA | Analytical cross-sectional     | US Armed Forces;<br>80 exertional heat illness cases                      | <b><u>Women</u></b><br>Heat illness: 0.680%<br><b><u>Men</u></b><br>Heat illness: 0.71%                                                             |
| Lisman et al, 2014[27]                            | USA | Analytical cross-sectional     | Military and university community members;<br><br>34 males and 12 females | <b><u>Heat tolerance parameters</u></b><br><b><u>Women</u></b><br>Heat intolerance rate: 42%<br><b><u>Men</u></b><br>Heat intolerance rate: 27%     |
| Armed Forces Health Surveillance Branch, 2015[45] | USA | Descriptive epidemiology; 2014 | US Armed Forces; 314 heat stroke cases<br>1410 other heat injuries cases* | <b><u>Women</u></b><br>Heat stroke: 0.14†<br>Other heat injuries: 1.31†<br><b><u>Men</u></b><br>Heat stroke: 0.27†<br>Other heat injuries: 1.21†    |
| Kazman et al, 2015[28]                            | USA | Analytical cross-sectional     | Military and university community members;<br>55 males and 20 females     | <b><u>Heat tolerance parameters</u></b><br><b><u>Women</u></b><br>Heat intolerance rate: 45%<br><br><b><u>Men</u></b><br>Heat intolerance rate: 18% |
| Armed Forces Health Surveillance Branch, 2016[46] | USA | Descriptive epidemiology; 2015 | US Armed Forces; 417 heat stroke cases<br>1625 other heat injuries cases* | <b><u>Women</u></b><br>Heat stroke: 0.16†<br>Other heat injuries: 1.54†<br><b><u>Men</u></b><br>Heat stroke: 0.35†<br>Other heat injuries: 1.48†    |
| Armed Forces Health Surveillance Branch, 2017[47] | USA | Descriptive epidemiology; 2016 | US Armed Forces; 401 heat stroke cases<br>2135 other heat injuries cases* | <b><u>Women</u></b><br>Heat stroke: 0.19†<br>Other heat injuries: 1.90†<br><b><u>Men</u></b><br>Heat stroke: 0.33†                                  |

1  
2  
3  
4  
5  
6  
7  
8  
9  
10  
11  
12  
13  
14  
15  
16  
17  
18  
19  
20  
21  
22  
23  
24  
25  
26  
27  
28  
29  
30  
31  
32  
33  
34  
35  
36  
37  
38  
39  
40  
41  
42  
43  
44  
45  
46

Other heat injuries: 1.61†

**Women**

Heat stroke: 0.25†

Other heat injuries: 1.38†

**Men**

Heat stroke: 0.41†

Other heat injuries: 1.41†

---

|                                                         |     |                                   |                                                                         |
|---------------------------------------------------------|-----|-----------------------------------|-------------------------------------------------------------------------|
| Armed Forces Health<br>Surveillance Branch,<br>2018[48] | USA | Descriptive epidemiology;<br>2017 | US Armed Forces;<br>464 heat stroke cases<br>1699 heat exhaustion cases |
|---------------------------------------------------------|-----|-----------------------------------|-------------------------------------------------------------------------|

---

§ Proportions and incidences reported are of the total cases reported in the articles  
# Incidence rate reported per 100,000 person-years.  
‡ Incidence rate per 100,000 person- months.  
† Incidence rate reported per 1000 person-years.  
\* Other heat injuries include “heat exhaustion” and “unspecified effects of heat”.  
¶ heat injuries include heat stroke and other heat injuries.  
UK = United Kingdom; USA = United States of America

**Supplemental Table 3: Quality assessment of included studies using the quality assessment tool for studies with diverse designs (QATSDD)**

| QATSDD Criteria       | 1 | 2 | 3 | 4 | 5 | 6 | 7 | 8 | 9 | 10 | 11 | 12 | Total score | % of total score |
|-----------------------|---|---|---|---|---|---|---|---|---|----|----|----|-------------|------------------|
| Dickinson' 94[29]     | 0 | 1 | 2 | 0 | 1 | 3 | 0 | 0 | 3 | 2  | 0  | 2  | 14/36       | 38.9             |
| AMSA'98[30]           | 2 | 1 | 1 | 0 | 0 | 0 | 0 | 0 | 2 | 2  | 0  | 0  | 8/36        | 22.2             |
| AMSA'00[33]           | 2 | 1 | 2 | 0 | 0 | 1 | 0 | 0 | 2 | 3  | 0  | 0  | 11/36       | 30.6             |
| AMSA'02[31]           | 3 | 0 | 2 | 0 | 1 | 1 | 0 | 0 | 2 | 0  | 2  | 0  | 11/36       | 30.6             |
| AMSA'03[32]           | 2 | 1 | 1 | 0 | 1 | 1 | 0 | 0 | 2 | 2  | 0  | 0  | 10/36       | 27.8             |
| Carter et al' 05[34]  | 3 | 3 | 3 | 2 | 2 | 3 | 1 | 2 | 3 | 3  | 2  | 0  | 27/36       | 75               |
| AMSA'06[36]           | 2 | 1 | 1 | 0 | 1 | 1 | 0 | 0 | 2 | 2  | 0  | 0  | 10/36       | 27.8             |
| Wallace et al' 06[49] | 3 | 3 | 3 | 2 | 2 | 3 | 1 | 2 | 3 | 3  | 2  | 2  | 29/36       | 80.6             |
| AFHSB'07[37]          | 1 | 1 | 1 | 0 | 0 | 1 | 0 | 0 | 2 | 2  | 0  | 0  | 8/36        | 22.2             |
| AFHSB' 08[38]         | 1 | 1 | 1 | 0 | 0 | 1 | 0 | 0 | 2 | 2  | 0  | 0  | 8/36        | 22.2             |
| AFHSB' 09[39]         | 1 | 1 | 1 | 0 | 0 | 1 | 0 | 0 | 2 | 2  | 0  | 0  | 8/36        | 22.2             |
| AFHSB' 10[40]         | 1 | 1 | 2 | 0 | 0 | 1 | 0 | 0 | 2 | 2  | 0  | 2  | 11/36       | 30.6             |
| AFHSB' 11[41]         | 2 | 1 | 2 | 0 | 0 | 1 | 0 | 0 | 2 | 2  | 0  | 2  | 12/36       | 33.3             |
| Druyan et al'12[12]   | 3 | 3 | 3 | 1 | 0 | 2 | 0 | 3 | 3 | 2  | 2  | 1  | 23/36       | 63.9             |
| AFHSB' 12[42]         | 2 | 1 | 2 | 0 | 0 | 1 | 0 | 0 | 2 | 2  | 0  | 2  | 12/36       | 33.3             |
| AFHSB' 13[43]         | 2 | 2 | 2 | 0 | 0 | 2 | 0 | 0 | 2 | 2  | 0  | 2  | 14/36       | 38.9             |
| AMSA' 14[44]          | 2 | 2 | 2 | 0 | 0 | 2 | 0 | 0 | 2 | 3  | 0  | 2  | 15/36       | 41.7             |
| Lisman et al,'14 [27] | 3 | 3 | 3 | 2 | 2 | 3 | 2 | 3 | 3 | 3  | 3  | 3  | 33/36       | 91.7             |
| AFHSB' 15[45]         | 3 | 2 | 2 | 0 | 0 | 2 | 0 | 0 | 2 | 3  | 0  | 2  | 16/36       | 44.4             |
| Bedno et al, 2015[35] | 3 | 3 | 3 | 2 | 2 | 3 | 3 | 3 | 3 | 3  | 3  | 3  | 34/36       | 94.4             |
| Kazman et al' 15[28]  | 3 | 3 | 3 | 2 | 2 | 3 | 2 | 3 | 3 | 3  | 3  | 3  | 33/36       | 91.7             |
| AFHSB' 16[46]         | 3 | 2 | 2 | 0 | 0 | 2 | 0 | 0 | 2 | 3  | 0  | 2  | 16/36       | 44.4             |
| AFHSB' 17[47]         | 3 | 2 | 2 | 0 | 0 | 2 | 0 | 0 | 2 | 3  | 0  | 2  | 16/36       | 44.4             |
| AFHSB' 18[48]         | 3 | 2 | 2 | 0 | 0 | 2 | 0 | 0 | 2 | 3  | 0  | 2  | 16/36       | 44.4             |

**QATSDD Criteria**

- (1) Theoretical framework; (6) Procedure for data collection (11) Good justification for analytical method selected  
 (2) Aims/objectives; (7) Rationale for choice of data collection tool(s) (12) Strengths and limitations.  
 (3) Description of research setting (8) Detailed recruitment data  
 (4) Sample size; (9) Fit between research question and method of data collection (Quantitative only)  
 (5) Representative sample of target group (10) Fit between research question and method of analysis (Quantitative only)  
 QATSDD rating scale: 0=not at all; 1=very slightly; 2=moderately; 3=complete; AMSA = Army Medical Surveillance Activity



# PRISMA 2009 Checklist

| Section/topic                      | #  | Checklist item                                                                                                                                                                                                                                                                                              | Reported on page #      |
|------------------------------------|----|-------------------------------------------------------------------------------------------------------------------------------------------------------------------------------------------------------------------------------------------------------------------------------------------------------------|-------------------------|
| <b>TITLE</b>                       |    |                                                                                                                                                                                                                                                                                                             |                         |
| Title                              | 1  | Identify the report as a systematic review, meta-analysis, or both.                                                                                                                                                                                                                                         | 1                       |
| <b>ABSTRACT</b>                    |    |                                                                                                                                                                                                                                                                                                             |                         |
| Structured summary                 | 2  | Provide a structured summary including, as applicable: background; objectives; data sources; study eligibility criteria, participants, and interventions; study appraisal and synthesis methods; results; limitations; conclusions and implications of key findings; systematic review registration number. | 2                       |
| <b>INTRODUCTION</b>                |    |                                                                                                                                                                                                                                                                                                             |                         |
| Rationale                          | 3  | Describe the rationale for the review in the context of what is already known.                                                                                                                                                                                                                              | 4,5,6                   |
| Objectives                         | 4  | Provide an explicit statement of questions being addressed with reference to participants, interventions, comparisons, outcomes, and study design (PICOS).                                                                                                                                                  | 7                       |
| <b>METHODS</b>                     |    |                                                                                                                                                                                                                                                                                                             |                         |
| Protocol and registration          | 5  | Indicate if a review protocol exists, if and where it can be accessed (e.g., Web address), and, if available, provide registration information including registration number.                                                                                                                               | 7                       |
| Eligibility criteria               | 6  | Specify study characteristics (e.g., PICOS, length of follow-up) and report characteristics (e.g., years considered, language, publication status) used as criteria for eligibility, giving rationale.                                                                                                      | 7                       |
| Information sources                | 7  | Describe all information sources (e.g., databases with dates of coverage, contact with study authors to identify additional studies) in the search and date last searched.                                                                                                                                  | 7                       |
| Search                             | 8  | Present full electronic search strategy for at least one database, including any limits used, such that it could be repeated.                                                                                                                                                                               | 7, supplemental table 1 |
| Study selection                    | 9  | State the process for selecting studies (i.e., screening, eligibility, included in systematic review, and, if applicable, included in the meta-analysis).                                                                                                                                                   | Figure 1                |
| Data collection process            | 10 | Describe method of data extraction from reports (e.g., piloted forms, independently, in duplicate) and any processes for obtaining and confirming data from investigators.                                                                                                                                  | 8                       |
| Data items                         | 11 | List and define all variables for which data were sought (e.g., PICOS, funding sources) and any assumptions and simplifications made.                                                                                                                                                                       | 8                       |
| Risk of bias in individual studies | 12 | Describe methods used for assessing risk of bias of individual studies (including specification of whether this was done at the study or outcome level), and how this information is to be used in any data synthesis.                                                                                      | 8, 9                    |
| Summary measures                   | 13 | State the principal summary measures (e.g., risk ratio, difference in means).                                                                                                                                                                                                                               | 9                       |
| Synthesis of results               | 14 | Describe the methods of handling data and combining results of studies, if done, including measures of consistency (e.g., I <sup>2</sup> ) for each meta-analysis. <a href="http://bmjopen.bmj.com/site/about/guidelines.xhtml">http://bmjopen.bmj.com/site/about/guidelines.xhtml</a>                      | 9                       |



# PRISMA 2009 Checklist

Page 1 of 2

| Section/topic                 | #  | Checklist item                                                                                                                                                                                           | Reported on page #                        |
|-------------------------------|----|----------------------------------------------------------------------------------------------------------------------------------------------------------------------------------------------------------|-------------------------------------------|
| Risk of bias across studies   | 15 | Specify any assessment of risk of bias that may affect the cumulative evidence (e.g., publication bias, selective reporting within studies).                                                             | 8                                         |
| Additional analyses           | 16 | Describe methods of additional analyses (e.g., sensitivity or subgroup analyses, meta-regression), if done, indicating which were pre-specified.                                                         | N/A                                       |
| <b>RESULTS</b>                |    |                                                                                                                                                                                                          |                                           |
| Study selection               | 17 | Give numbers of studies screened, assessed for eligibility, and included in the review, with reasons for exclusions at each stage, ideally with a flow diagram.                                          | 10, Figure 1                              |
| Study characteristics         | 18 | For each study, present characteristics for which data were extracted (e.g., study size, PICOS, follow-up period) and provide the citations.                                                             | 10, Supplemental table 2                  |
| Risk of bias within studies   | 19 | Present data on risk of bias of each study and, if available, any outcome level assessment (see item 12).                                                                                                | 15                                        |
| Results of individual studies | 20 | For all outcomes considered (benefits or harms), present, for each study: (a) simple summary data for each intervention group (b) effect estimates and confidence intervals, ideally with a forest plot. | 10, 11, 12, 13, 14, Figure 1 and Figure 2 |
| Synthesis of results          | 21 | Present results of each meta-analysis done, including confidence intervals and measures of consistency.                                                                                                  | NA                                        |
| Risk of bias across studies   | 22 | Present results of any assessment of risk of bias across studies (see Item 15).                                                                                                                          | 15                                        |
| Additional analysis           | 23 | Give results of additional analyses, if done (e.g., sensitivity or subgroup analyses, meta-regression [see Item 16]).                                                                                    | N/A                                       |
| <b>DISCUSSION</b>             |    |                                                                                                                                                                                                          |                                           |
| Summary of evidence           | 24 | Summarize the main findings including the strength of evidence for each main outcome; consider their relevance to key groups (e.g., healthcare providers, users, and policy makers).                     | 15                                        |
| Limitations                   | 25 | Discuss limitations at study and outcome level (e.g., risk of bias), and at review-level (e.g., incomplete retrieval of identified research, reporting bias).                                            | 18, 19                                    |
| Conclusions                   | 26 | Provide a general interpretation of the results in the context of other evidence, and implications for future research.                                                                                  | 15, 16, 17, 18                            |
| <b>FUNDING</b>                |    |                                                                                                                                                                                                          |                                           |
| Funding                       | 27 | Describe sources of funding for the systematic review and other support (e.g., supply of data); role of funders for the systematic review.                                                               | 20                                        |

From: Moher D, Liberati A, Tetzlaff J, Altman DG, The PRISMA Group (2009). Preferred Reporting Items for Systematic Reviews and Meta-Analyses: The PRISMA Statement. PLoS Med 6(6): e1000097. doi:10.1371/journal.pmed1000097

For more information, visit: [www.prisma-statement.org](http://www.prisma-statement.org). Page 2 of 2

For peer review only - <http://bmjopen.bmj.com/site/about/guidelines.xhtml>
