# Supplementary material for: Systematic review of gender differences in the epidemiology and risk factors of exertional heat illness and heat tolerance in the armed forces
Source: PubMed Central journal article supplement — BMJ Open. 2020 Apr 6;10(4):e031825. doi: 10.1136/bmjopen-2019-031825 (PMC7245403; doi:10.1136/bmjopen-2019-031825), 2020-04-06
Supplement: bmjopen-2019-031825supp001.pdf [file bmjopen-2019-031825supp001.pdf]

**Supplemental Table 1**

|     | <b>Medline search strategy</b>                                                                                                                                                                           |
|-----|----------------------------------------------------------------------------------------------------------------------------------------------------------------------------------------------------------|
| 1.  | Women (MeSH)                                                                                                                                                                                             |
| 2.  | Gender expression                                                                                                                                                                                        |
| 3.  | Gender identity (MeSH)                                                                                                                                                                                   |
| 4.  | Gender                                                                                                                                                                                                   |
| 5.  | Wom\$                                                                                                                                                                                                    |
| 6.  | Sex                                                                                                                                                                                                      |
| 7.  | Heat strok*                                                                                                                                                                                              |
| 8.  | Heatstrok*                                                                                                                                                                                               |
| 9.  | Heat collapse                                                                                                                                                                                            |
| 10. | Heat exhaustion                                                                                                                                                                                          |
| 11. | Heat prostration                                                                                                                                                                                         |
| 12. | Heat cramp                                                                                                                                                                                               |
| 13. | Heat cramps                                                                                                                                                                                              |
| 14. | Heat stress disorder                                                                                                                                                                                     |
| 15. | Heat stress disorders (MeSH)                                                                                                                                                                             |
| 16. | Thermal stress                                                                                                                                                                                           |
| 17. | Heat illness                                                                                                                                                                                             |
| 18. | Heat illnesses                                                                                                                                                                                           |
| 19. | Heat injury                                                                                                                                                                                              |
| 20. | Heat injuries                                                                                                                                                                                            |
| 21. | Heat related diseases                                                                                                                                                                                    |
| 22. | Heat disorder                                                                                                                                                                                            |
| 23. | Heat disorders                                                                                                                                                                                           |
| 24. | Heat related disorder                                                                                                                                                                                    |
| 25. | Heat related disorders                                                                                                                                                                                   |
| 26. | Heat related illness                                                                                                                                                                                     |
| 27. | Heat related illnesses                                                                                                                                                                                   |
| 28. | Heat related injuries                                                                                                                                                                                    |
| 29. | Heat related injury                                                                                                                                                                                      |
| 30. | Environmental heat illness                                                                                                                                                                               |
| 31. | Heat stress                                                                                                                                                                                              |
| 32. | Heat adaptation                                                                                                                                                                                          |
| 33. | Heat tolerance                                                                                                                                                                                           |
| 34. | Heat tolerances                                                                                                                                                                                          |
| 35. | Heat resistance                                                                                                                                                                                          |
| 36. | Thermal resistance                                                                                                                                                                                       |
| 37. | Thermoresistance                                                                                                                                                                                         |
| 38. | Thermotolerance (MeSH)                                                                                                                                                                                   |
| 39. | Heat endurance                                                                                                                                                                                           |
| 40. | 1 OR 2 OR 3 OR 4 OR 5 OR 6                                                                                                                                                                               |
| 41. | 7 OR 8 OR 9 OR 10 OR 11 OR 12 OR 13 OR 14 OR 15 OR 16 OR<br>17 OR 18 OR 19 OR 20 OR 21 OR 22 OR 23 OR 24 OR 25 OR 26<br>OR 27 OR 28 OR 29 OR 30 OR 31 OR 32 OR 33 OR 34 OR 35 OR<br>36 OR 37 OR 38 OR 39 |
| 42. | 40 AND 41                                                                                                                                                                                                |
