# Supplementary material for: Systematic review of gender differences in the epidemiology and risk factors of exertional heat illness and heat tolerance in the armed forces
Source: PubMed Central journal article supplement — BMJ Open. 2020 Apr 6;10(4):e031825. doi: 10.1136/bmjopen-2019-031825 (PMC7245403; doi:10.1136/bmjopen-2019-031825), 2020-04-06
Supplement: bmjopen-2019-031825supp002.pdf [file bmjopen-2019-031825supp002.pdf]

**Supplemental Table 2**  
**Summary of all included studies**

| Reference, year                              | Country | Study design and duration             | Population                                                                     | Study findings <sup>§</sup>                                                                                                                                    |
|----------------------------------------------|---------|---------------------------------------|--------------------------------------------------------------------------------|----------------------------------------------------------------------------------------------------------------------------------------------------------------|
| Dickson. G, 1994[29]                         | UK      | Descriptive epidemiology; 1981-1991   | Royal Airforce, Royal Navy and Army; 1448 all heat injuries cases <sup>†</sup> | <b>Women</b><br>All heat injuries: 11.43 <sup>#</sup><br><b>Men</b><br>All heat injuries: 41.87 <sup>#</sup>                                                   |
| Army Medical Surveillance Activity, 1998[30] | USA     | Descriptive epidemiology; 1997 - 1998 | US Army; 1433 all heat injuries cases (1997-1998) <sup>†</sup><br>1997         | <b>Women</b><br>All heat injuries: 12.8 <sup>†</sup><br><b>Men</b><br>All heat injuries: 8.6 <sup>†</sup>                                                      |
|                                              |         |                                       | 1998                                                                           | <b>Women</b><br>All heat injuries: 15.8 <sup>†</sup><br><b>Men</b><br>All heat injuries: 12.0 <sup>†</sup>                                                     |
| Army Medical Surveillance Activity, 2000[33] | USA     | Descriptive epidemiology; 1997 - 1999 | US Army and Marine Corps; 3386 all heat injuries cases <sup>†</sup>            | <b>Women</b><br>All heat injuries: 2.0 <sup>†</sup>                                                                                                            |
|                                              |         |                                       | Army (1896 cases)                                                              | <b>Men</b><br>All heat injuries: 1.5 <sup>†</sup><br><b>Women</b><br>All heat injuries: 4.4 <sup>†</sup>                                                       |
|                                              |         |                                       | Marine Corps (1104 cases)                                                      | <b>Men</b><br>All heat injuries: 2.0 <sup>†</sup>                                                                                                              |
| Army Medical Surveillance Activity, 2002[31] | USA     | Descriptive epidemiology; 1990 - 1997 | US Army; 2290 all heat injuries cases <sup>†</sup>                             | <b>Women</b><br>All heat injuries: 14.0%<br><b>Men</b><br>All heat injuries: 86.0%                                                                             |
|                                              |         |                                       | Case – control<br>1998 - 2001                                                  | US Army; 5021 cases and 10,042 controls (all heat injuries) <sup>†</sup><br><b>Women</b><br>All heat injuries: 20.7%<br><b>Men</b><br>All heat injuries: 79.3% |

|                                                   |     |                                |                                                                                  |                                                                                                                                                                                                                             |
|---------------------------------------------------|-----|--------------------------------|----------------------------------------------------------------------------------|-----------------------------------------------------------------------------------------------------------------------------------------------------------------------------------------------------------------------------|
|                                                   |     |                                |                                                                                  | <b>Risk factors</b><br>Female: OR; 1.5 (1.4 - 1.7)                                                                                                                                                                          |
| Army Medical Surveillance Activity, 2003[32]      | USA | Descriptive epidemiology; 2002 | US Army; 1816 all heat injuries cases <sup>a</sup>                               | <b>Women</b><br>All heat injuries: 3.5 <sup>†</sup>                                                                                                                                                                         |
|                                                   |     |                                |                                                                                  | <b>Men</b><br>All heat injuries: 5.1 <sup>†</sup>                                                                                                                                                                           |
| Carter et al, 2005[34]                            | USA | Cross-sectional 1980 - 2002    | US Army; 5246 all heat injuries cases <sup>a</sup><br>4521 males and 725 females | <b>Women</b><br>All heat injuries: 13.7%<br><b>Men</b><br>All heat injuries: 86.3%<br><b>Risk factors</b><br>Female: IDR: 1.21 (1.09 – 1.40)                                                                                |
| Army Medical Surveillance Activity, 2006[36]      | USA | Descriptive epidemiology; 2005 | US Armed Forces; 204 heat stroke cases<br>958 heat exhaustion cases              | <b>Women</b><br>Heat stroke: 0.26 <sup>†</sup><br>Heat exhaustion: 2.89 <sup>†</sup><br><b>Men</b><br>Heat stroke: 0.48 <sup>†</sup><br>Heat exhaustion: 1.98 <sup>†</sup>                                                  |
| Wallace et al, 2005[49]                           | USA | Case-control 1988 - 1996       | US Army; 5246 cases of heat illness;<br>4521 males and 725 females               | <b>Risk factors</b><br><b>Females</b><br>Run time ≥ 6.9 minutes:<br>OR; 5.30 (1.59 – 17.64)<br><b>Males</b><br>Run time ≥ 12.9 minutes:<br>OR; 5.61 (3.73 – 8.45)<br>BMI ≥ 26 kg/m <sup>2</sup> :<br>OR; 2.10 (1.59 – 2.78) |
| Armed Forces Health Surveillance Branch, 2007[37] | USA | Descriptive epidemiology; 2006 | US Armed Forces; 259 heat stroke cases<br>1854 heat exhaustion cases             | <b>Women</b><br>Heat stroke: 0.14 <sup>†</sup><br>Heat exhaustion: 1.49 <sup>†</sup><br><b>Men</b><br>Heat stroke: 0.22 <sup>†</sup><br>Heat exhaustion: 1.34 <sup>†</sup>                                                  |
| Armed Forces Health Surveillance Branch, 2008[38] | USA | Descriptive epidemiology; 2007 | US Armed Forces; 329 heat stroke cases<br>1853 heat exhaustion cases             | <b>Women</b><br>Heat stroke: 0.14 <sup>†</sup><br>Heat exhaustion: 1.62 <sup>†</sup><br><b>Men</b>                                                                                                                          |

|                                                   |        |                                              |                                                                           |                                                                                                                                     |
|---------------------------------------------------|--------|----------------------------------------------|---------------------------------------------------------------------------|-------------------------------------------------------------------------------------------------------------------------------------|
|                                                   |        |                                              |                                                                           | Heat stroke: 0.26†<br>Heat exhaustion: 1.34†                                                                                        |
| Armed Forces Health Surveillance Branch, 2009[39] | USA    | Descriptive epidemiology; 2008               | US Armed Forces; 299 heat stroke cases<br>1467 heat exhaustion cases      | <b>Women</b><br>Heat stroke: 0.16†<br>Heat exhaustion: 1.35†<br><b>Men</b><br>Heat stroke: 0.22†<br>Heat exhaustion: 1.78†          |
| Armed Forces Health Surveillance Branch, 2010[40] | USA    | Descriptive epidemiology; 2009               | US Armed Forces; 323 heat stroke cases<br>2038 other heat injuries cases* | <b>Women</b><br>Heat stroke: 0.15†<br>Other heat injuries: 1.78†<br><b>Men</b><br>Heat stroke: 0.24†<br>Other heat injuries: 1.35†  |
| Armed Forces Health Surveillance Branch, 2011[41] | USA    | Descriptive epidemiology; 2010               | US Armed Forces; 311 heat stroke cases<br>2576 other heat injuries cases* | <b>Women</b><br>Heat stroke: 0.12†<br>Other heat injuries: 2.32†<br><b>Men</b><br>Heat stroke: 0.23†<br>Other heat injuries: 1.67†  |
| Armed Forces Health Surveillance Branch, 2012[42] | USA    | Descriptive epidemiology; 2011               | US Armed Forces; 362 heat stroke cases<br>2652 other heat injuries cases* | <b>Women</b><br>Heat stroke: 0.10†<br>Other heat injuries: 2.63†<br><b>Men</b><br>Heat stroke: 0.27†<br>Other heat injuries: 1.68†  |
| Druyan et al, 2012[12]                            | Israel | Retrospective cross-sectional<br>2008 – 2010 | Israeli Defence Forces;<br>170 males and 9 females                        | <b>Heat tolerance parameters</b><br><b>Women</b><br>Heat intolerance rate: 66.6%<br><br><b>Men</b><br>Heat intolerance rate: 25.79% |
| Armed Forces Health Surveillance Branch, 2013[43] | USA    | Descriptive epidemiology; 2012               | US Armed Forces; 365 heat stroke cases<br>2257 other heat injuries cases* | <b>Women</b><br>Heat stroke: 0.15†<br>Other heat injuries: 2.35†<br><b>Men</b><br>Heat stroke: 0.27†<br>Other heat injuries: 1.44†  |

|                                                   |     |                                |                                                                           |                                                                                                                                    |
|---------------------------------------------------|-----|--------------------------------|---------------------------------------------------------------------------|------------------------------------------------------------------------------------------------------------------------------------|
| Armed Forces Health Surveillance Branch, 2014[44] | USA | Descriptive epidemiology; 2013 | US Armed Forces; 324 heat stroke cases<br>1701 other heat injuries cases* | <b>Women</b><br>Heat stroke: 0.15†<br>Other heat injuries: 1.30†<br><b>Men</b><br>Heat stroke: 0.24†<br>Other heat injuries: 1.19† |
| Bedno et al, 2014[35]                             | USA | Analytical cross-sectional     | US Armed Forces;<br>80 exertional heat illness cases                      | <b>Women</b><br>Heat illness: 0.680%<br><b>Men</b><br>Heat illness: 0.71%                                                          |
| Lisman et al, 2014[27]                            | USA | Analytical cross-sectional     | Military and university community members;<br><br>34 males and 12 females | <b>Heat tolerance parameters</b><br><b>Women</b><br>Heat intolerance rate: 42%<br><b>Men</b><br>Heat intolerance rate: 27%         |
| Armed Forces Health Surveillance Branch, 2015[45] | USA | Descriptive epidemiology; 2014 | US Armed Forces; 314 heat stroke cases<br>1410 other heat injuries cases* | <b>Women</b><br>Heat stroke: 0.14†<br>Other heat injuries: 1.31†<br><b>Men</b><br>Heat stroke: 0.27†<br>Other heat injuries: 1.21† |
| Kazman et al, 2015[28]                            | USA | Analytical cross-sectional     | Military and university community members;<br>55 males and 20 females     | <b>Heat tolerance parameters</b><br><b>Women</b><br>Heat intolerance rate: 45%<br><br><b>Men</b><br>Heat intolerance rate: 18%     |
| Armed Forces Health Surveillance Branch, 2016[46] | USA | Descriptive epidemiology; 2015 | US Armed Forces; 417 heat stroke cases<br>1625 other heat injuries cases* | <b>Women</b><br>Heat stroke: 0.16†<br>Other heat injuries: 1.54†<br><b>Men</b><br>Heat stroke: 0.35†<br>Other heat injuries: 1.48† |
| Armed Forces Health Surveillance Branch, 2017[47] | USA | Descriptive epidemiology; 2016 | US Armed Forces; 401 heat stroke cases<br>2135 other heat injuries cases* | <b>Women</b><br>Heat stroke: 0.19†<br>Other heat injuries: 1.90†<br><b>Men</b><br>Heat stroke: 0.33†                               |

|                                                         |     |                                   |                                                                         |                                                                                                                                                                  |
|---------------------------------------------------------|-----|-----------------------------------|-------------------------------------------------------------------------|------------------------------------------------------------------------------------------------------------------------------------------------------------------|
| Armed Forces Health<br>Surveillance Branch,<br>2018[48] | USA | Descriptive epidemiology;<br>2017 | US Armed Forces;<br>464 heat stroke cases<br>1699 heat exhaustion cases | Other heat injuries: 1.61†<br><b>Women</b><br>Heat stroke: 0.25†<br>Other heat injuries: 1.38†<br><b>Men</b><br>Heat stroke: 0.41†<br>Other heat injuries: 1.41† |
|---------------------------------------------------------|-----|-----------------------------------|-------------------------------------------------------------------------|------------------------------------------------------------------------------------------------------------------------------------------------------------------|

§ Proportions and incidences reported are of the total cases reported in the articles

# Incidence rate reported per 100,000 person-years.

‡ Incidence rate per 100,000 person- months.

† Incidence rate reported per 1000 person-years.

\* Other heat injuries include “heat exhaustion” and “unspecified effects of heat”.

¶ heat injuries include heat stroke and other heat injuries.

UK = United Kingdom; USA = United States of America
