# Supplementary material for: Systematic review of gender differences in the epidemiology and risk factors of exertional heat illness and heat tolerance in the armed forces
Source: PubMed Central journal article supplement — BMJ Open. 2020 Apr 6;10(4):e031825. doi: 10.1136/bmjopen-2019-031825 (PMC7245403; doi:10.1136/bmjopen-2019-031825), 2020-04-06
Supplement: bmjopen-2019-031825supp003.pdf [file bmjopen-2019-031825supp003.pdf]

**Supplemental Table 3: Quality assessment of included studies using the quality assessment tool for studies with diverse designs (QATSDD)**

| <b>QATSDD Criteria</b> | <b>1</b> | <b>2</b> | <b>3</b> | <b>4</b> | <b>5</b> | <b>6</b> | <b>7</b> | <b>8</b> | <b>9</b> | <b>10</b> | <b>11</b> | <b>12</b> | <b>Total score</b> | <b>% of total score</b> |
|------------------------|----------|----------|----------|----------|----------|----------|----------|----------|----------|-----------|-----------|-----------|--------------------|-------------------------|
| Dickinson' 94[29]      | 0        | 1        | 2        | 0        | 1        | 3        | 0        | 0        | 3        | 2         | 0         | 2         | 14/36              | 38.9                    |
| AMSA'98[30]            | 2        | 1        | 1        | 0        | 0        | 0        | 0        | 0        | 2        | 2         | 0         | 0         | 8/36               | 22.2                    |
| AMSA'00[33]            | 2        | 1        | 2        | 0        | 0        | 1        | 0        | 0        | 2        | 3         | 0         | 0         | 11/36              | 30.6                    |
| AMSA'02[31]            | 3        | 0        | 2        | 0        | 1        | 1        | 0        | 0        | 2        | 0         | 2         | 0         | 11/36              | 30.6                    |
| AMSA'03[32]            | 2        | 1        | 1        | 0        | 1        | 1        | 0        | 0        | 2        | 2         | 0         | 0         | 10/36              | 27.8                    |
| Carter et al' 05[34]   | 3        | 3        | 3        | 2        | 2        | 3        | 1        | 2        | 3        | 3         | 2         | 0         | 27/36              | 75                      |
| AMSA'06[36]            | 2        | 1        | 1        | 0        | 1        | 1        | 0        | 0        | 2        | 2         | 0         | 0         | 10/36              | 27.8                    |
| Wallace et al' 06[49]  | 3        | 3        | 3        | 2        | 2        | 3        | 1        | 2        | 3        | 3         | 2         | 2         | 29/36              | 80.6                    |
| AFHSB'07[37]           | 1        | 1        | 1        | 0        | 0        | 1        | 0        | 0        | 2        | 2         | 0         | 0         | 8/36               | 22.2                    |
| AFHSB' 08[38]          | 1        | 1        | 1        | 0        | 0        | 1        | 0        | 0        | 2        | 2         | 0         | 0         | 8/36               | 22.2                    |
| AFHSB' 09[39]          | 1        | 1        | 1        | 0        | 0        | 1        | 0        | 0        | 2        | 2         | 0         | 0         | 8/36               | 22.2                    |
| AFHSB' 10[40]          | 1        | 1        | 2        | 0        | 0        | 1        | 0        | 0        | 2        | 2         | 0         | 2         | 11/36              | 30.6                    |
| AFHSB' 11[41]          | 2        | 1        | 2        | 0        | 0        | 1        | 0        | 0        | 2        | 2         | 0         | 2         | 12/36              | 33.3                    |
| Druyan et al'12[12]    | 3        | 3        | 3        | 1        | 0        | 2        | 0        | 3        | 3        | 2         | 2         | 1         | 23/36              | 63.9                    |
| AFHSB' 12[42]          | 2        | 1        | 2        | 0        | 0        | 1        | 0        | 0        | 2        | 2         | 0         | 2         | 12/36              | 33.3                    |
| AFHSB' 13[43]          | 2        | 2        | 2        | 0        | 0        | 2        | 0        | 0        | 2        | 2         | 0         | 2         | 14/36              | 38.9                    |
| AMSA' 14[44]           | 2        | 2        | 2        | 0        | 0        | 2        | 0        | 0        | 2        | 3         | 0         | 2         | 15/36              | 41.7                    |
| Lisman et al,'14 [27]  | 3        | 3        | 3        | 2        | 2        | 3        | 2        | 3        | 3        | 3         | 3         | 3         | 33/36              | 91.7                    |
| AFHSB' 15[45]          | 3        | 2        | 2        | 0        | 0        | 2        | 0        | 0        | 2        | 3         | 0         | 2         | 16/36              | 44.4                    |
| Bedno et al, 2015[35]  | 3        | 3        | 3        | 2        | 2        | 3        | 3        | 3        | 3        | 3         | 3         | 3         | 34/36              | 94.4                    |
| Kazman et al' 15[28]   | 3        | 3        | 3        | 2        | 2        | 3        | 2        | 3        | 3        | 3         | 3         | 3         | 33/36              | 91.7                    |
| AFHSB' 16[46]          | 3        | 2        | 2        | 0        | 0        | 2        | 0        | 0        | 2        | 3         | 0         | 2         | 16/36              | 44.4                    |
| AFHSB' 17[47]          | 3        | 2        | 2        | 0        | 0        | 2        | 0        | 0        | 2        | 3         | 0         | 2         | 16/36              | 44.4                    |
| AFHSB' 18[48]          | 3        | 2        | 2        | 0        | 0        | 2        | 0        | 0        | 2        | 3         | 0         | 2         | 16/36              | 44.4                    |

**QATSDD Criteria**

(1) Theoretical framework;

(2) Aims/objectives;

(3) Description of research setting

(4) Sample size;

(5) Representative sample of target group

*QATSDD rating scale: 0=not at all; 1=very slightly; 2=moderately; 3=complete; AMSA = Army Medical Surveillance Activity*

(6) Procedure for data collection

(7) Rationale for choice of data collection tool(s)

(8) Detailed recruitment data

(9) Fit between research question and method of data collection (Quantitative only)

(10) Fit between research question and method of analysis (Quantitative only)

(11) Good justification for analytical method selected

(12) Strengths and limitations.
